# Supplementary material
Source: publisher site journal article supplement (https://journals.iucr.org/services/coeditors/meetings/jmb/2024/AppendixE.pdf)
Supplement: Supplementary file 1 [file AppendixE.pdf]

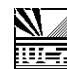

## Publication statistics for 2023

---

Enclosed are:

1. Notes on the statistics.
2. Manuscripts received by Co-editors in 2023.
3. Manuscripts accepted for publication by Editors and Co-editors in 2023.
4. Lengths of papers and publication times in IUCr journals.
5. Survey of the contents of IUCr journals (Executive Committee Report Format).
6. Distribution of papers and authors, by country.
7. Manuscripts rejected and withdrawn in 2023.
8. Citation statistics.
9. Download statistics.
10. Number of open-access articles.
11. Category statistics.

Peter Strickland, Gillian Holmes, Mike Hoyland  
January 2024

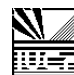

# 1. Notes on the statistics

---

## 1. Manuscripts received by Co-editors

The number of manuscripts submitted to *Acta* in 2023 was 7% lower than in 2022. There were increases in submissions to *Sections A* (up from 81 to 98) and *E* (up from 269 to 302), and falls in submissions to *Sections B* (down from 115 to 100), *C* (down from 171 to 132), *D* (down from 153 to 113) and *Section F* (down from 70 to 54).

In total, 799 *Acta* manuscripts were submitted, compared with 859 in 2022 and 1022 in 2021.

The number of manuscripts submitted to *IUCrData* was 141, compared with 106 in 2022 and 108 in 2021.

A total of 110 manuscripts were submitted to *IUCrJ*, compared with 105 in 2022 and 117 in 2021.

The number of manuscripts submitted to *JAC* was 317, compared with 275 in 2022 and 282 in 2021.

A total of 182 manuscripts were submitted to *JSR*, compared with 178 in 2022 and 273 in 2021.

## 2. Papers accepted for publication

The number of *Acta* papers accepted for publication by Co-editors in 2023 was 543, a 14% decrease on 2022 when 633 were accepted. There were increases in the number of papers accepted for publication for *Sections A* and *E* of 11% and 5%, respectively, and decreases in the number of papers accepted for publication for *Sections B*, *C*, *D* and *F* of 45%, 37%, 18% and 28%, respectively.

The number of papers accepted for *IUCrData* was 122, compared with 96 in 2022 and 92 in 2021.

A total of 68 papers were accepted for *IUCrJ*, compared with 60 in 2022 and 94 in 2021.

The number of papers accepted for *JAC* was 177, compared with 187 in 2022 and 175 in 2021.

A total of 115 papers were accepted for *JSR*, compared with 154 in 2022 and 198 in 2021.

## 3. Papers published

Overall, 4329 *Acta* pages were published in 2023, compared with 5353 in 2022 and 5942 in 2021. 601 pages were published in *Section A* (519 in 2022), 546 in *Section B* (892 in 2022), 529 in *Section C* (759 in 2022), 1119 in *Section D* (1473 in 2022), 1227 in *Section E* (1288 in 2022) and 307 in *Section F* (422 in 2022).

The average lengths of Full Articles increased to 11.3 pages in *Section A*, 8.4 pages in *Section C*, 11.7 pages in *Section D* and 5.1 pages in *Section E*. The average lengths of Full Articles decreased to 10.0 pages in *Section B* and 7.7 pages in *Section F*. Average publication times decreased to 4.6 months for *Sections B* and 4.8 months for *Section D*, increased for *Sections A* (6.1 months), *C* (2.9 months) and *F* (3.3 months), and remained the same for *Section E* (1.6 months).

The number of Full Articles published in *IUCrData* in 2023 was 123 compared with 94 in 2022. The number of pages was 375 (291 in 2022). The average length of an article was 3.0 pages and the average publication time decreased to 1 month.

The number of Full Articles published in *IUCrJ* in 2023 was 63 compared with 65 in 2022. The number of pages was 771 (791 in 2022). The average publication time remained the same at 4.9 months. The average length of a Full Article increased to 11.2 pages.

The number of Full Articles published in *JAC* in 2023 was 154, up from 142 in 2022. The number of pages increased from 1706 in 2022 to 1884 in 2023. The average publication time decreased to 6.0 months. The average length of a Full Article remained the same at 10.2 pages.

The number of Full Articles published in *JSR* in 2023 was 117 compared with 149 in 2022. The number of pages decreased to 1183 (1503 in 2022). The average publication time remained the same at 5.3 months. The average length of a Full Article increased to 9.6 pages.

#### 4. Distribution of papers and authors by country

For *Section A*, there were increases in the proportion of papers from Germany, Switzerland and the UK, and decreases in the proportion of papers from Australia and Denmark. The top countries for *Section A* were the USA (23%), Germany (13%) and Switzerland (7%). *Section B* saw an increase in the proportion of papers from India, Poland, Russia and Germany, and a decrease in the proportion from France, Switzerland and the USA. The top three countries for *Section B* were Russia (20%), Poland (16%) and Germany (11%). For *Section C*, there were increases in the proportion of papers from Poland and the UK, and decreases for China, India and Japan. The top three countries for *Section C* were USA (21%), Poland (14%) and China (12%). *Section D* saw a decrease in the proportion of papers from Italy, South Korea and Spain, and increases for Germany and the USA. The top three countries for *Section D* were the USA (23%), Germany (13%) and the UK (13%). There were increases in the proportion of papers from Germany and India in *Section E* while the proportion of papers from China decreased. The top three countries for *Section E* were the USA (17%), Germany (15%) and India (12%). There were increases in the proportion of papers from Belgium, France and Japan in *Section F*, and decreases in the proportion of papers from Canada, India and Italy. The top three countries for *Section F* were the USA (31%), Japan (19%) and Germany (8%).

The highest proportion of articles in *IUCrData* came from the USA (35%) followed by Germany (14%) and China (10%). There were increases in the proportion of papers from the Germany, Morocco, Slovenia and the USA, and decreases in the proportion of papers from Algeria, China, India and Japan.

For *IUCrJ*, there were increases in the proportion of papers from China, South Korea, Switzerland and the UK, and decreases in the proportion of papers from the France, Germany, Japan and Poland. The top three countries for *IUCrJ* were the USA (17%), China (13%) and the UK (12%).

For *JAC*, there were increases in the proportion of papers from France, Poland and the USA, and decreases in the proportion of papers from Japan and Germany. The top three countries for *JAC* were the USA (18%), Germany (15%) and France (12%).

For *JSR*, there were increases in the proportion of papers from Australia, China, Germany and Switzerland, and decreases in the proportion of papers from Russia, the UK and the USA. The top three countries for *JSR* were the USA (16%), Germany (16%) and France (14%).

#### 5. Manuscripts rejected and withdrawn

The overall rejection and withdrawal rate was 31% compared to 24% in 2022. There were increases in the rejection and withdrawal rates for *Section A* (42%), *B* (42%) *C* (51%), *E* (13%), *F* (32%), *JAC* (37%) and *JSR* (31%) and decreases in the rejection and withdrawal rates for *Section D* (22%) and *IUCrJ* (31%), while the rate remained the same for *IUCrData* (9%). The rejection and withdrawal rate was highest for *Section C* (51%), and lowest for *IUCrData* (9%).

#### 6. Citation statistics

*JAC* was the top ranking crystallography journal with an impact factor of 6.1. *IUCrJ* received an impact factor of 3.9. *Section E* received an impact factor of 0.9, its first since 2011.

#### 7. Download statistics

The number of downloads of IUCr journal articles from the journals website was over 13.6 million in 2023, a slight decrease on the preceeding year (14.1 million). *Section E* had the largest number of downloads (5.5 million), with a large growth in *JSR* downloads to over 1.8 million.

#### 8. Open-access articles

The number of open-access articles published in IUCr Journals in 2023 was 846, compared with 888 in 2022. The proportion of open-access articles published in our hybrid journals in 2023 was 51% (compared with 45% in 2022).

#### 9. Summary

The total number of articles published in 2023 was 1103, which compares with 1220 in 2022 and 1373 in 2021. The total number of pages published in 2023 was 8542 (9644 in 2022 and 11145 in 2021).

The number of manuscripts submitted was 1549 (compared with 1523 in 2022 and 1802 in 2021). The total number of accepted papers was 1025 (compared with 1130 in 2022 and 1291 in 2021).

*Section C* published a special issue on Halogen, Chalcogen, Pnictogen and Tetrel Bonds: Structural Chemistry and Beyond. *Section D* published papers arising from the CCP4 and CCP-EM meetings. *Section E* published a special issue on Modern Approaches and Tools for Teaching Crystallography. *JAC* published special issues on Small-Angle Scattering and on Magnetic Small-Angle Neutron Scattering – From Nanoscale Magnetism to Long-Range Magnetic Structures.

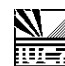

## 2. Manuscripts received by Co-editors in 2023

These figures include both accepted and rejected papers.

### 2.1. Summary

| 2022<br>Total |             | 2023<br>Total | Month |     |     |     |     |     |     |     |     |     |     |     |
|---------------|-------------|---------------|-------|-----|-----|-----|-----|-----|-----|-----|-----|-----|-----|-----|
|               |             |               | Jan   | Feb | Mar | Apr | May | Jun | Jul | Aug | Sep | Oct | Nov | Dec |
| 81            | Section A   | 98            | 8     | 9   | 5   | 11  | 6   | 8   | 10  | 8   | 7   | 9   | 13  | 4   |
| 115           | Section B   | 100           | 9     | 11  | 11  | 2   | 7   | 11  | 11  | 7   | 6   | 6   | 11  | 8   |
| 171           | Section C   | 132           | 15    | 14  | 14  | 11  | 17  | 5   | 9   | 10  | 13  | 6   | 8   | 10  |
| 153           | Section D   | 113           | 9     | 12  | 15  | 8   | 12  | 7   | 7   | 5   | 10  | 12  | 8   | 8   |
| 269           | Section E   | 302           | 26    | 25  | 25  | 22  | 21  | 15  | 33  | 22  | 24  | 32  | 35  | 22  |
| 70            | Section F   | 54            | 2     | 6   | 6   | 4   | 6   | 3   | 6   | 6   | 2   | 5   | 3   | 5   |
| 859           | Acta Cryst. | 799           | 69    | 77  | 76  | 58  | 69  | 49  | 76  | 58  | 62  | 70  | 78  | 57  |
| 275           | JAC         | 317           | 17    | 38  | 27  | 15  | 28  | 26  | 26  | 21  | 25  | 29  | 29  | 36  |
| 178           | JSR         | 182           | 7     | 10  | 23  | 15  | 14  | 12  | 19  | 14  | 13  | 18  | 18  | 19  |
| 105           | IUCrJ       | 110           | 3     | 9   | 11  | 5   | 12  | 13  | 4   | 10  | 7   | 11  | 6   | 19  |
| 106           | IUCrData    | 141           | 13    | 8   | 15  | 13  | 13  | 12  | 15  | 19  | 12  | 8   | 7   | 6   |
| 1523          | TOTALS      | 1549          | 109   | 142 | 152 | 106 | 136 | 112 | 140 | 122 | 119 | 136 | 138 | 137 |

### 2.2. Acta Crystallographica Section A

| Co-editor    | 2023  | Month |     |     |     |     |     |     |     |     |     |     |     |
|--------------|-------|-------|-----|-----|-----|-----|-----|-----|-----|-----|-----|-----|-----|
|              | Total | Jan   | Feb | Mar | Apr | May | Jun | Jul | Aug | Sep | Oct | Nov | Dec |
| Altomare     | 16    | 0     | 2   | 1   | 2   | 0   | 2   | 3   | 2   | 0   | 1   | 2   | 1   |
| Aroyo        | 7     | 0     | 0   | 1   | 1   | 1   | 1   | 0   | 0   | 0   | 1   | 2   | 0   |
| Billinge     | 9     | 1     | 1   | 0   | 0   | 0   | 1   | 1   | 1   | 0   | 0   | 2   | 2   |
| De Las Penas | 9     | 2     | 1   | 0   | 0   | 0   | 0   | 3   | 0   | 1   | 0   | 2   | 0   |
| Dominiak     | 12    | 0     | 2   | 1   | 0   | 0   | 0   | 1   | 3   | 2   | 2   | 0   | 1   |
| Gorelik      | 4     | 1     | 0   | 0   | 0   | 0   | 0   | 0   | 2   | 0   | 0   | 1   | 0   |
| Keen         | 2     | 0     | 1   | 0   | 0   | 0   | 0   | 0   | 0   | 0   | 0   | 1   | 0   |
| Kurlin       | 4     | 0     | 0   | 1   | 2   | 0   | 1   | 0   | 0   | 0   | 0   | 0   | 0   |
| Margiolaki   | 2     | 0     | 0   | 0   | 0   | 0   | 0   | 1   | 0   | 0   | 1   | 0   | 0   |
| Nespolo      | 2     | 1     | 0   | 0   | 0   | 0   | 1   | 0   | 0   | 0   | 0   | 0   | 0   |
| Palatinus    | 11    | 1     | 2   | 0   | 2   | 2   | 1   | 0   | 0   | 1   | 1   | 1   | 0   |
| Singer       | 1     | 0     | 0   | 0   | 0   | 1   | 0   | 0   | 0   | 0   | 0   | 0   | 0   |
| Vartanians   | 6     | 1     | 0   | 0   | 2   | 1   | 0   | 0   | 0   | 1   | 1   | 0   | 0   |
| Willmott     | 6     | 0     | 0   | 1   | 0   | 0   | 1   | 1   | 0   | 0   | 2   | 1   | 0   |
| Totals       | 98    | 8     | 9   | 5   | 11  | 6   | 8   | 10  | 8   | 7   | 9   | 13  | 4   |

### 2.3. Acta Crystallographica Section B

| Co-editor   | 2023  | Month |     |     |     |     |     |     |     |     |     |     |     |
|-------------|-------|-------|-----|-----|-----|-----|-----|-----|-----|-----|-----|-----|-----|
|             | Total | Jan   | Feb | Mar | Apr | May | Jun | Jul | Aug | Sep | Oct | Nov | Dec |
| Bekker      | 5     | 0     | 0   | 0   | 0   | 1   | 0   | 2   | 0   | 0   | 0   | 2   | 0   |
| Blake       | 2     | 1     | 1   | 0   | 0   | 0   | 0   | 0   | 0   | 0   | 0   | 0   | 0   |
| Cerny       | 13    | 3     | 1   | 2   | 0   | 0   | 2   | 2   | 1   | 0   | 1   | 0   | 1   |
| Dawe        | 1     | 0     | 0   | 0   | 0   | 0   | 0   | 0   | 0   | 1   | 0   | 0   | 0   |
| Du          | 2     | 0     | 0   | 0   | 0   | 0   | 1   | 0   | 0   | 0   | 0   | 1   | 0   |
| Dusek       | 10    | 0     | 1   | 1   | 0   | 1   | 0   | 1   | 2   | 1   | 1   | 1   | 1   |
| Hadermann   | 3     | 1     | 0   | 0   | 0   | 0   | 1   | 0   | 0   | 0   | 1   | 0   | 0   |
| Katrusiak   | 7     | 0     | 1   | 0   | 0   | 1   | 2   | 1   | 0   | 1   | 0   | 1   | 0   |
| Knope       | 7     | 1     | 1   | 0   | 0   | 1   | 1   | 0   | 0   | 1   | 0   | 1   | 1   |
| Lipkowski   | 10    | 0     | 1   | 1   | 0   | 1   | 1   | 1   | 1   | 1   | 1   | 1   | 1   |
| Macchi      | 5     | 0     | 0   | 0   | 0   | 1   | 1   | 0   | 0   | 0   | 0   | 1   | 2   |
| Nangia      | 7     | 0     | 1   | 1   | 1   | 0   | 0   | 0   | 0   | 1   | 1   | 1   | 1   |
| Neder       | 3     | 0     | 1   | 0   | 0   | 0   | 1   | 1   | 0   | 0   | 0   | 0   | 0   |
| Nespolo     | 1     | 0     | 1   | 0   | 0   | 0   | 0   | 0   | 0   | 0   | 0   | 0   | 0   |
| Reddy       | 7     | 0     | 1   | 2   | 0   | 1   | 1   | 1   | 1   | 0   | 0   | 0   | 0   |
| Yakubovich  | 6     | 1     | 0   | 1   | 1   | 0   | 0   | 0   | 0   | 0   | 1   | 1   | 1   |
| de Boissieu | 2     | 0     | 1   | 0   | 0   | 0   | 0   | 0   | 1   | 0   | 0   | 0   | 0   |
| Totals      | 100   | 9     | 11  | 11  | 2   | 7   | 11  | 11  | 7   | 6   | 6   | 11  | 8   |

### 2.4. Acta Crystallographica Section C

| Co-editor   | 2023  | Month |     |     |     |     |     |     |     |     |     |     |     |
|-------------|-------|-------|-----|-----|-----|-----|-----|-----|-----|-----|-----|-----|-----|
|             | Total | Jan   | Feb | Mar | Apr | May | Jun | Jul | Aug | Sep | Oct | Nov | Dec |
| Almeida Paz | 4     | 1     | 0   | 1   | 1   | 1   | 0   | 0   | 0   | 0   | 0   | 0   | 0   |
| Brammer     | 1     | 0     | 0   | 0   | 1   | 0   | 0   | 0   | 0   | 0   | 0   | 0   | 0   |
| Cheung      | 1     | 1     | 0   | 0   | 0   | 0   | 0   | 0   | 0   | 0   | 0   | 0   | 0   |
| Cooper      | 6     | 1     | 1   | 0   | 0   | 2   | 1   | 0   | 0   | 1   | 0   | 0   | 0   |
| Dawe        | 3     | 0     | 0   | 1   | 1   | 1   | 0   | 0   | 0   | 0   | 0   | 0   | 0   |
| Diniz       | 13    | 1     | 1   | 1   | 1   | 1   | 1   | 1   | 2   | 1   | 1   | 1   | 1   |
| Falvello    | 1     | 0     | 1   | 0   | 0   | 0   | 0   | 0   | 0   | 0   | 0   | 0   | 0   |
| Ferrara     | 1     | 0     | 0   | 0   | 0   | 0   | 0   | 0   | 0   | 0   | 0   | 0   | 1   |
| Gardiner    | 9     | 1     | 1   | 1   | 1   | 1   | 0   | 0   | 2   | 1   | 0   | 1   | 0   |
| Hua         | 3     | 0     | 0   | 0   | 0   | 0   | 1   | 1   | 0   | 0   | 1   | 0   | 0   |
| Lemmerer    | 11    | 0     | 2   | 1   | 2   | 1   | 0   | 1   | 1   | 2   | 0   | 0   | 1   |
| Lewis       | 1     | 0     | 0   | 1   | 0   | 0   | 0   | 0   | 0   | 0   | 0   | 0   | 0   |
| Lu          | 1     | 0     | 1   | 0   | 0   | 0   | 0   | 0   | 0   | 0   | 0   | 0   | 0   |
| Moggach     | 3     | 0     | 1   | 0   | 0   | 0   | 1   | 0   | 1   | 0   | 0   | 0   | 0   |
| Ohhara      | 8     | 1     | 1   | 1   | 0   | 1   | 0   | 0   | 0   | 1   | 1   | 1   | 1   |
| Oliver      | 5     | 3     | 1   | 0   | 0   | 0   | 0   | 0   | 0   | 0   | 0   | 0   | 1   |
| Oswald      | 6     | 0     | 0   | 1   | 1   | 1   | 0   | 1   | 0   | 0   | 0   | 0   | 2   |
| Raithby     | 2     | 1     | 0   | 0   | 0   | 0   | 0   | 1   | 0   | 0   | 0   | 0   | 0   |
| Reinheimer  | 9     | 1     | 0   | 0   | 0   | 2   | 1   | 0   | 1   | 2   | 1   | 1   | 0   |
| Rosales-Hoz | 13    | 2     | 1   | 1   | 0   | 2   | 0   | 0   | 2   | 2   | 1   | 2   | 0   |
| Turner      | 5     | 1     | 1   | 1   | 0   | 1   | 0   | 0   | 0   | 0   | 0   | 0   | 1   |
| Wang        | 3     | 0     | 0   | 0   | 0   | 1   | 0   | 0   | 1   | 1   | 0   | 0   | 0   |
| White       | 2     | 0     | 0   | 0   | 1   | 0   | 0   | 1   | 0   | 0   | 0   | 0   | 0   |
| Williams    | 4     | 0     | 0   | 2   | 0   | 0   | 0   | 2   | 0   | 0   | 0   | 0   | 0   |
| Yap         | 4     | 0     | 1   | 0   | 1   | 1   | 0   | 0   | 0   | 0   | 0   | 0   | 1   |
| Yousufuddin | 7     | 0     | 0   | 1   | 1   | 1   | 0   | 1   | 0   | 1   | 1   | 1   | 0   |
| Totals      | 132   | 15    | 14  | 14  | 11  | 17  | 5   | 9   | 10  | 13  | 6   | 8   | 10  |

### 2.5. Acta Crystallographica Section D

| Co-editor         | 2023  | Month |     |     |     |     |     |     |     |     |     |     |     |
|-------------------|-------|-------|-----|-----|-----|-----|-----|-----|-----|-----|-----|-----|-----|
|                   | Total | Jan   | Feb | Mar | Apr | May | Jun | Jul | Aug | Sep | Oct | Nov | Dec |
| Antonyuk*         | 1     | 0     | 0   | 1   | 0   | 0   | 0   | 0   | 0   | 0   | 0   | 0   | 0   |
| Berghuis          | 6     | 0     | 0   | 1   | 1   | 0   | 1   | 0   | 0   | 1   | 1   | 0   | 1   |
| Burnley*          | 2     | 0     | 0   | 0   | 0   | 0   | 0   | 0   | 0   | 0   | 1   | 1   | 0   |
| Cingolani         | 2     | 0     | 1   | 1   | 0   | 0   | 0   | 0   | 0   | 0   | 0   | 0   | 0   |
| Czjzek            | 7     | 0     | 1   | 2   | 1   | 1   | 1   | 0   | 0   | 0   | 1   | 0   | 0   |
| Derewenda         | 4     | 0     | 1   | 1   | 0   | 1   | 0   | 0   | 0   | 1   | 0   | 0   | 0   |
| Diederichs        | 4     | 1     | 1   | 0   | 0   | 0   | 2   | 0   | 0   | 0   | 0   | 0   | 0   |
| Garman            | 10    | 1     | 1   | 1   | 1   | 1   | 0   | 0   | 0   | 3   | 1   | 0   | 1   |
| Garratt           | 2     | 0     | 0   | 0   | 0   | 0   | 0   | 0   | 0   | 0   | 2   | 0   | 0   |
| Gold              | 1     | 0     | 0   | 0   | 0   | 0   | 0   | 0   | 0   | 0   | 1   | 0   | 0   |
| Gonzalez          | 3     | 0     | 0   | 1   | 1   | 0   | 0   | 0   | 0   | 0   | 0   | 0   | 1   |
| Kobe              | 8     | 0     | 2   | 1   | 0   | 1   | 1   | 0   | 0   | 0   | 1   | 1   | 1   |
| Kurusu            | 2     | 0     | 0   | 0   | 1   | 1   | 0   | 0   | 0   | 0   | 0   | 0   | 0   |
| Langan            | 4     | 1     | 0   | 1   | 0   | 0   | 0   | 0   | 0   | 1   | 0   | 1   | 0   |
| Mueller-Dieckmann | 5     | 0     | 0   | 0   | 0   | 0   | 0   | 1   | 1   | 1   | 2   | 0   | 0   |
| Muench*           | 2     | 0     | 0   | 0   | 0   | 0   | 0   | 0   | 0   | 0   | 0   | 2   | 0   |
| Newman            | 5     | 1     | 1   | 0   | 0   | 1   | 0   | 1   | 0   | 0   | 0   | 0   | 1   |
| Nicholls          | 5     | 1     | 1   | 0   | 1   | 1   | 0   | 1   | 0   | 0   | 0   | 0   | 0   |
| Read              | 8     | 1     | 2   | 0   | 0   | 1   | 0   | 1   | 0   | 0   | 1   | 2   | 0   |
| Rudolph           | 6     | 0     | 0   | 2   | 0   | 1   | 0   | 0   | 1   | 0   | 1   | 1   | 0   |
| Schiltz           | 3     | 0     | 0   | 1   | 0   | 0   | 0   | 1   | 0   | 1   | 0   | 0   | 0   |
| Vinothkumar       | 2     | 0     | 0   | 0   | 2   | 0   | 0   | 0   | 0   | 0   | 0   | 0   | 0   |
| Vollmar           | 1     | 0     | 0   | 0   | 0   | 0   | 0   | 0   | 1   | 0   | 0   | 0   | 0   |
| Wakatsuki         | 4     | 0     | 1   | 0   | 0   | 0   | 1   | 0   | 0   | 1   | 0   | 0   | 1   |
| Waterman          | 6     | 1     | 0   | 0   | 0   | 1   | 0   | 2   | 0   | 1   | 0   | 0   | 1   |
| Totals            | 113   | 9     | 12  | 15  | 8   | 12  | 7   | 7   | 5   | 10  | 12  | 8   | 8   |

## 2.6. Acta Crystallographica Section E

| Co-editor        | 2023  | Month |     |     |     |     |     |     |     |     |     |     |     |
|------------------|-------|-------|-----|-----|-----|-----|-----|-----|-----|-----|-----|-----|-----|
|                  | Total | Jan   | Feb | Mar | Apr | May | Jun | Jul | Aug | Sep | Oct | Nov | Dec |
| Akitsu           | 1     | 0     | 0   | 0   | 0   | 0   | 0   | 0   | 0   | 0   | 1   | 0   | 0   |
| Alvarez Failache | 2     | 0     | 0   | 0   | 0   | 0   | 0   | 0   | 0   | 1   | 0   | 1   | 0   |
| Batsanov         | 9     | 1     | 0   | 1   | 1   | 0   | 2   | 1   | 0   | 0   | 0   | 3   | 0   |
| Briceno          | 11    | 1     | 1   | 1   | 1   | 2   | 0   | 1   | 0   | 2   | 1   | 1   | 0   |
| Chopra           | 8     | 1     | 0   | 0   | 2   | 1   | 0   | 1   | 0   | 1   | 1   | 1   | 0   |
| Delgado          | 3     | 0     | 0   | 0   | 0   | 0   | 0   | 0   | 0   | 0   | 1   | 2   | 0   |
| Di Salvo         | 3     | 0     | 0   | 0   | 0   | 0   | 0   | 0   | 0   | 0   | 2   | 1   | 0   |
| Diaz de Delgado  | 14    | 1     | 1   | 0   | 2   | 0   | 2   | 3   | 3   | 0   | 1   | 0   | 1   |
| Domasevitch      | 2     | 0     | 0   | 0   | 0   | 0   | 0   | 0   | 0   | 0   | 1   | 0   | 1   |
| Ellena           | 13    | 2     | 1   | 1   | 1   | 2   | 0   | 1   | 1   | 1   | 2   | 1   | 0   |
| Ferrence         | 2     | 0     | 0   | 0   | 0   | 0   | 0   | 0   | 0   | 0   | 1   | 0   | 1   |
| Furlan Ferreira  | 3     | 0     | 0   | 0   | 0   | 0   | 0   | 0   | 0   | 0   | 2   | 0   | 1   |
| Hao              | 3     | 0     | 0   | 0   | 0   | 0   | 0   | 0   | 0   | 0   | 1   | 1   | 1   |
| Harrison         | 43    | 6     | 5   | 3   | 5   | 3   | 2   | 2   | 3   | 3   | 3   | 5   | 3   |
| Jancik           | 9     | 2     | 0   | 2   | 1   | 0   | 0   | 3   | 0   | 0   | 0   | 1   | 0   |
| Kelley           | 4     | 0     | 0   | 0   | 0   | 0   | 0   | 0   | 0   | 0   | 1   | 2   | 1   |
| Mague            | 4     | 0     | 1   | 0   | 0   | 1   | 0   | 1   | 0   | 0   | 1   | 0   | 0   |
| Manke*           | 1     | 0     | 0   | 0   | 0   | 0   | 0   | 0   | 0   | 0   | 1   | 0   | 0   |
| Massera          | 2     | 1     | 0   | 0   | 0   | 0   | 0   | 0   | 0   | 0   | 0   | 1   | 0   |
| Ozawa            | 2     | 0     | 0   | 0   | 0   | 0   | 0   | 0   | 0   | 0   | 1   | 0   | 1   |
| Parkin           | 27    | 1     | 5   | 3   | 1   | 1   | 3   | 4   | 0   | 4   | 0   | 0   | 5   |
| Reibenspies      | 18    | 2     | 2   | 0   | 1   | 1   | 1   | 2   | 2   | 1   | 1   | 3   | 2   |
| Schulzke         | 21    | 1     | 2   | 3   | 0   | 2   | 2   | 3   | 2   | 0   | 1   | 3   | 2   |
| Suescun          | 2     | 0     | 0   | 0   | 0   | 0   | 0   | 0   | 0   | 0   | 1   | 1   | 0   |
| Therrien         | 18    | 1     | 1   | 3   | 1   | 2   | 1   | 2   | 1   | 3   | 2   | 1   | 0   |
| Van Meervelt     | 18    | 1     | 1   | 2   | 2   | 2   | 1   | 2   | 3   | 0   | 1   | 2   | 1   |
| Weil             | 39    | 5     | 3   | 3   | 4   | 2   | 0   | 4   | 5   | 5   | 3   | 4   | 1   |
| Zeller           | 13    | 0     | 2   | 3   | 0   | 1   | 1   | 2   | 1   | 1   | 2   | 0   | 0   |
| Zema             | 2     | 0     | 0   | 0   | 0   | 0   | 0   | 0   | 1   | 1   | 0   | 0   | 0   |
| Zheng            | 3     | 0     | 0   | 0   | 0   | 0   | 0   | 0   | 0   | 1   | 0   | 1   | 1   |
| Totals           | 302   | 26    | 25  | 25  | 22  | 21  | 15  | 33  | 22  | 24  | 32  | 35  | 22  |

## 2.7. Acta Crystallographica Section F

| Co-editor        | 2023  | Month |     |     |     |     |     |     |     |     |     |     |     |
|------------------|-------|-------|-----|-----|-----|-----|-----|-----|-----|-----|-----|-----|-----|
|                  | Total | Jan   | Feb | Mar | Apr | May | Jun | Jul | Aug | Sep | Oct | Nov | Dec |
| Bowler           | 3     | 0     | 1   | 0   | 0   | 0   | 1   | 0   | 0   | 0   | 1   | 0   | 0   |
| Chen             | 1     | 0     | 0   | 0   | 0   | 0   | 0   | 0   | 0   | 0   | 0   | 0   | 1   |
| Czjzek           | 1     | 1     | 0   | 0   | 0   | 0   | 0   | 0   | 0   | 0   | 0   | 0   | 0   |
| Diederichs       | 1     | 0     | 1   | 0   | 0   | 0   | 0   | 0   | 0   | 0   | 0   | 0   | 0   |
| Duntun           | 1     | 0     | 0   | 0   | 0   | 0   | 0   | 1   | 0   | 0   | 0   | 0   | 0   |
| Hough            | 2     | 0     | 0   | 0   | 1   | 0   | 0   | 0   | 1   | 0   | 0   | 0   | 0   |
| Kim              | 5     | 0     | 1   | 1   | 0   | 0   | 0   | 1   | 1   | 0   | 0   | 0   | 1   |
| Kurisu           | 1     | 0     | 1   | 0   | 0   | 0   | 0   | 0   | 0   | 0   | 0   | 0   | 0   |
| Nakagawa         | 3     | 0     | 1   | 0   | 0   | 0   | 0   | 1   | 1   | 0   | 0   | 0   | 0   |
| Newman           | 4     | 1     | 0   | 0   | 0   | 0   | 1   | 1   | 0   | 0   | 0   | 1   | 0   |
| Privé            | 2     | 0     | 0   | 0   | 0   | 1   | 0   | 0   | 0   | 0   | 0   | 1   | 0   |
| Romao            | 3     | 0     | 0   | 1   | 1   | 0   | 0   | 0   | 0   | 1   | 0   | 0   | 0   |
| Sankaranarayanan | 6     | 0     | 1   | 0   | 1   | 3   | 0   | 0   | 0   | 0   | 1   | 0   | 0   |
| Shimon           | 1     | 0     | 0   | 0   | 0   | 0   | 0   | 0   | 0   | 0   | 0   | 0   | 1   |
| Smith            | 1     | 0     | 0   | 0   | 0   | 0   | 0   | 0   | 0   | 1   | 0   | 0   | 0   |
| Stanfield        | 1     | 0     | 0   | 1   | 0   | 0   | 0   | 0   | 0   | 0   | 0   | 0   | 0   |
| Strater          | 6     | 0     | 0   | 2   | 1   | 1   | 0   | 0   | 2   | 0   | 0   | 0   | 0   |
| van Raaij        | 7     | 0     | 0   | 0   | 0   | 1   | 0   | 2   | 1   | 0   | 1   | 1   | 1   |
| Totals           | 54    | 2     | 6   | 6   | 4   | 6   | 3   | 6   | 6   | 2   | 5   | 3   | 5   |

## 2.8. Acta Crystallographica

| 2022<br>Total | Co-editor        | 2023<br>Total | Month |     |     |     |     |     |     |     |     |     |     |     |
|---------------|------------------|---------------|-------|-----|-----|-----|-----|-----|-----|-----|-----|-----|-----|-----|
|               |                  |               | Jan   | Feb | Mar | Apr | May | Jun | Jul | Aug | Sep | Oct | Nov | Dec |
| 0             | Akitsu           | 1             | 0     | 0   | 0   | 0   | 0   | 0   | 0   | 0   | 0   | 1   | 0   | 0   |
| 2             | Almeida Paz      | 4             | 1     | 0   | 1   | 1   | 1   | 0   | 0   | 0   | 0   | 0   | 0   | 0   |
| 14            | Altomare         | 16            | 0     | 2   | 1   | 2   | 0   | 2   | 3   | 2   | 0   | 1   | 2   | 1   |
| 0             | Alvarez Failache | 2             | 0     | 0   | 0   | 0   | 0   | 0   | 0   | 0   | 1   | 0   | 1   | 0   |
| –             | Antonyuk*        | 1             | 0     | 0   | 1   | 0   | 0   | 0   | 0   | 0   | 0   | 0   | 0   | 0   |
| 8             | Aroyo            | 7             | 0     | 0   | 1   | 1   | 1   | 1   | 0   | 0   | 0   | 1   | 2   | 0   |
| 12            | Batsanov         | 9             | 1     | 0   | 1   | 1   | 0   | 2   | 1   | 0   | 0   | 0   | 3   | 0   |
| 9             | Bekker           | 5             | 0     | 0   | 0   | 0   | 1   | 0   | 2   | 0   | 0   | 0   | 2   | 0   |
| 0             | Berghuis         | 6             | 0     | 0   | 1   | 1   | 0   | 1   | 0   | 0   | 1   | 1   | 0   | 1   |
| 6             | Billinge         | 9             | 1     | 1   | 0   | 0   | 0   | 1   | 1   | 1   | 0   | 0   | 2   | 2   |
| 4             | Blake            | 2             | 1     | 1   | 0   | 0   | 0   | 0   | 0   | 0   | 0   | 0   | 0   | 0   |
| 4             | Bowler           | 3             | 0     | 1   | 0   | 0   | 0   | 1   | 0   | 0   | 0   | 1   | 0   | 0   |
| 7             | Brammer          | 1             | 0     | 0   | 0   | 1   | 0   | 0   | 0   | 0   | 0   | 0   | 0   | 0   |
| 9             | Briceno          | 11            | 1     | 1   | 1   | 1   | 2   | 0   | 1   | 0   | 2   | 1   | 1   | 0   |
| –             | Burnley*         | 2             | 0     | 0   | 0   | 0   | 0   | 0   | 0   | 0   | 0   | 1   | 1   | 0   |
| 16            | Cerny            | 13            | 3     | 1   | 2   | 0   | 0   | 2   | 2   | 1   | 0   | 1   | 0   | 1   |
| 1             | Chen             | 1             | 0     | 0   | 0   | 0   | 0   | 0   | 0   | 0   | 0   | 0   | 0   | 1   |
| 4             | Cheung           | 1             | 1     | 0   | 0   | 0   | 0   | 0   | 0   | 0   | 0   | 0   | 0   | 0   |
| 8             | Chopra           | 8             | 1     | 0   | 0   | 2   | 1   | 0   | 1   | 0   | 1   | 1   | 1   | 0   |
| 8             | Cingolani        | 2             | 0     | 1   | 1   | 0   | 0   | 0   | 0   | 0   | 0   | 0   | 0   | 0   |
| 8             | Cooper           | 6             | 1     | 1   | 0   | 0   | 2   | 1   | 0   | 0   | 1   | 0   | 0   | 0   |
| 8             | Czjzek           | 8             | 1     | 1   | 2   | 1   | 1   | 1   | 0   | 0   | 0   | 1   | 0   | 0   |
| 6             | Dawe             | 4             | 0     | 0   | 1   | 1   | 1   | 0   | 0   | 0   | 1   | 0   | 0   | 0   |
| 5             | De Las Penas     | 9             | 2     | 1   | 0   | 0   | 0   | 0   | 3   | 0   | 1   | 0   | 2   | 0   |
| 0             | Delgado          | 3             | 0     | 0   | 0   | 0   | 0   | 0   | 0   | 0   | 0   | 1   | 2   | 0   |
| 7             | Derewenda        | 4             | 0     | 1   | 1   | 0   | 1   | 0   | 0   | 0   | 1   | 0   | 0   | 0   |
| 0             | Di Salvo         | 3             | 0     | 0   | 0   | 0   | 0   | 0   | 0   | 0   | 0   | 2   | 1   | 0   |
| 21            | Diaz de Delgado  | 14            | 1     | 1   | 0   | 2   | 0   | 2   | 3   | 3   | 0   | 1   | 0   | 1   |
| 9             | Diederichs       | 5             | 1     | 2   | 0   | 0   | 0   | 2   | 0   | 0   | 0   | 0   | 0   | 0   |
| 11            | Diniz            | 13            | 1     | 1   | 1   | 1   | 1   | 1   | 1   | 2   | 1   | 1   | 1   | 1   |
| 0             | Domasevitch      | 2             | 0     | 0   | 0   | 0   | 0   | 0   | 0   | 0   | 0   | 1   | 0   | 1   |
| 8             | Dominiak         | 12            | 0     | 2   | 1   | 0   | 0   | 0   | 1   | 3   | 2   | 2   | 0   | 1   |
| 3             | Du               | 2             | 0     | 0   | 0   | 0   | 0   | 1   | 0   | 0   | 0   | 0   | 1   | 0   |
| 3             | Dunten           | 1             | 0     | 0   | 0   | 0   | 0   | 0   | 1   | 0   | 0   | 0   | 0   | 0   |
| 3             | Dusek            | 10            | 0     | 1   | 1   | 0   | 1   | 0   | 1   | 2   | 1   | 1   | 1   | 1   |
| 14            | Ellena           | 13            | 2     | 1   | 1   | 1   | 2   | 0   | 1   | 1   | 1   | 2   | 1   | 0   |
| 0             | Falvello         | 1             | 0     | 1   | 0   | 0   | 0   | 0   | 0   | 0   | 0   | 0   | 0   | 0   |
| 0             | Ferrara          | 1             | 0     | 0   | 0   | 0   | 0   | 0   | 0   | 0   | 0   | 0   | 0   | 1   |
| 0             | Ferrence         | 2             | 0     | 0   | 0   | 0   | 0   | 0   | 0   | 0   | 0   | 1   | 0   | 1   |
| 0             | Furlan Ferreira  | 3             | 0     | 0   | 0   | 0   | 0   | 0   | 0   | 0   | 0   | 2   | 0   | 1   |
| 9             | Gardiner         | 9             | 1     | 1   | 1   | 1   | 1   | 0   | 0   | 2   | 1   | 0   | 1   | 0   |
| 2             | Garman           | 10            | 1     | 1   | 1   | 1   | 1   | 0   | 0   | 0   | 3   | 1   | 0   | 1   |
| 5             | Garratt          | 2             | 0     | 0   | 0   | 0   | 0   | 0   | 0   | 0   | 0   | 2   | 0   | 0   |
| 0             | Gold             | 1             | 0     | 0   | 0   | 0   | 0   | 0   | 0   | 0   | 0   | 1   | 0   | 0   |
| 6             | Gonzalez         | 3             | 0     | 0   | 1   | 1   | 0   | 0   | 0   | 0   | 0   | 0   | 0   | 1   |
| 4             | Gorelik          | 4             | 1     | 0   | 0   | 0   | 0   | 0   | 0   | 2   | 0   | 0   | 1   | 0   |
| 5             | Hadermann        | 3             | 1     | 0   | 0   | 0   | 0   | 1   | 0   | 0   | 0   | 1   | 0   | 0   |
| 0             | Hao              | 3             | 0     | 0   | 0   | 0   | 0   | 0   | 0   | 0   | 0   | 1   | 1   | 1   |
| 38            | Harrison         | 43            | 6     | 5   | 3   | 5   | 3   | 2   | 2   | 3   | 3   | 3   | 5   | 3   |
| 4             | Hough            | 2             | 0     | 0   | 0   | 1   | 0   | 0   | 0   | 1   | 0   | 0   | 0   | 0   |
| 0             | Hua              | 3             | 0     | 0   | 0   | 0   | 0   | 1   | 1   | 0   | 0   | 1   | 0   | 0   |
| 11            | Jancik           | 9             | 2     | 0   | 2   | 1   | 0   | 0   | 3   | 0   | 0   | 0   | 1   | 0   |
| 7             | Katrusiak        | 7             | 0     | 1   | 0   | 0   | 1   | 2   | 1   | 0   | 1   | 0   | 1   | 0   |
| 1             | Keen             | 2             | 0     | 1   | 0   | 0   | 0   | 0   | 0   | 0   | 0   | 0   | 1   | 0   |
| 0             | Kelley           | 4             | 0     | 0   | 0   | 0   | 0   | 0   | 0   | 0   | 0   | 1   | 2   | 1   |
| 4             | Kim              | 5             | 0     | 1   | 1   | 0   | 0   | 0   | 1   | 1   | 0   | 0   | 0   | 1   |
| 6             | Knope            | 7             | 1     | 1   | 0   | 0   | 1   | 1   | 0   | 0   | 1   | 0   | 1   | 1   |
| 13            | Kobe             | 8             | 0     | 2   | 1   | 0   | 1   | 1   | 0   | 0   | 0   | 1   | 1   | 1   |

## 2.8. Acta Crystallographica

| 2022<br>Total | Co-editor         | 2023<br>Total | Month |     |     |     |     |     |     |     |     |     |     |     |
|---------------|-------------------|---------------|-------|-----|-----|-----|-----|-----|-----|-----|-----|-----|-----|-----|
|               |                   |               | Jan   | Feb | Mar | Apr | May | Jun | Jul | Aug | Sep | Oct | Nov | Dec |
| 3             | Kurisu            | 3             | 0     | 1   | 0   | 1   | 1   | 0   | 0   | 0   | 0   | 0   | 0   | 0   |
| 3             | Kurlin            | 4             | 0     | 0   | 1   | 2   | 0   | 1   | 0   | 0   | 0   | 0   | 0   | 0   |
| 9             | Langan            | 4             | 1     | 0   | 1   | 0   | 0   | 0   | 0   | 0   | 1   | 0   | 1   | 0   |
| 15            | Lemmerer          | 11            | 0     | 2   | 1   | 2   | 1   | 0   | 1   | 1   | 2   | 0   | 0   | 1   |
| 3             | Lewis             | 1             | 0     | 0   | 1   | 0   | 0   | 0   | 0   | 0   | 0   | 0   | 0   | 0   |
| 5             | Lipkowski         | 10            | 0     | 1   | 1   | 0   | 1   | 1   | 1   | 1   | 1   | 1   | 1   | 1   |
| 5             | Lu                | 1             | 0     | 1   | 0   | 0   | 0   | 0   | 0   | 0   | 0   | 0   | 0   | 0   |
| 8             | Macchi            | 5             | 0     | 0   | 0   | 0   | 1   | 1   | 0   | 0   | 0   | 0   | 1   | 2   |
| 11            | Mague             | 4             | 0     | 1   | 0   | 0   | 1   | 0   | 1   | 0   | 0   | 1   | 0   | 0   |
| –             | Manke*            | 1             | 0     | 0   | 0   | 0   | 0   | 0   | 0   | 0   | 0   | 1   | 0   | 0   |
| 6             | Margiolaki        | 2             | 0     | 0   | 0   | 0   | 0   | 0   | 1   | 0   | 0   | 1   | 0   | 0   |
| 0             | Massera           | 2             | 1     | 0   | 0   | 0   | 0   | 0   | 0   | 0   | 0   | 0   | 1   | 0   |
| 5             | Moggach           | 3             | 0     | 1   | 0   | 0   | 0   | 1   | 0   | 1   | 0   | 0   | 0   | 0   |
| 0             | Mueller-Dieckmann | 5             | 0     | 0   | 0   | 0   | 0   | 0   | 1   | 1   | 1   | 2   | 0   | 0   |
| –             | Muench*           | 2             | 0     | 0   | 0   | 0   | 0   | 0   | 0   | 0   | 0   | 0   | 2   | 0   |
| 9             | Nakagawa          | 3             | 0     | 1   | 0   | 0   | 0   | 0   | 1   | 1   | 0   | 0   | 0   | 0   |
| 12            | Nangia            | 7             | 0     | 1   | 1   | 1   | 0   | 0   | 0   | 0   | 1   | 1   | 1   | 1   |
| 2             | Neder             | 3             | 0     | 1   | 0   | 0   | 0   | 1   | 1   | 0   | 0   | 0   | 0   | 0   |
| 5             | Nespolo           | 3             | 1     | 1   | 0   | 0   | 0   | 1   | 0   | 0   | 0   | 0   | 0   | 0   |
| 2             | Newman            | 9             | 2     | 1   | 0   | 0   | 1   | 1   | 2   | 0   | 0   | 0   | 1   | 1   |
| 2             | Nicholls          | 5             | 1     | 1   | 0   | 1   | 1   | 0   | 1   | 0   | 0   | 0   | 0   | 0   |
| 7             | Ohhara            | 8             | 1     | 1   | 1   | 0   | 1   | 0   | 0   | 0   | 1   | 1   | 1   | 1   |
| 9             | Oliver            | 5             | 3     | 1   | 0   | 0   | 0   | 0   | 0   | 0   | 0   | 0   | 0   | 1   |
| 4             | Oswald            | 6             | 0     | 0   | 1   | 1   | 1   | 0   | 1   | 0   | 0   | 0   | 0   | 2   |
| 0             | Ozawa             | 2             | 0     | 0   | 0   | 0   | 0   | 0   | 0   | 0   | 0   | 1   | 0   | 1   |
| 6             | Palatinus         | 11            | 1     | 2   | 0   | 2   | 2   | 1   | 0   | 0   | 1   | 1   | 1   | 0   |
| 16            | Parkin            | 27            | 1     | 5   | 3   | 1   | 1   | 3   | 4   | 0   | 4   | 0   | 0   | 5   |
| 2             | Privé             | 2             | 0     | 0   | 0   | 0   | 1   | 0   | 0   | 0   | 0   | 0   | 1   | 0   |
| 2             | Raithby           | 2             | 1     | 0   | 0   | 0   | 0   | 0   | 1   | 0   | 0   | 0   | 0   | 0   |
| 9             | Read              | 8             | 1     | 2   | 0   | 0   | 1   | 0   | 1   | 0   | 0   | 1   | 2   | 0   |
| 10            | Reddy             | 7             | 0     | 1   | 2   | 0   | 1   | 1   | 1   | 1   | 0   | 0   | 0   | 0   |
| 10            | Reibenspies       | 18            | 2     | 2   | 0   | 1   | 1   | 1   | 2   | 2   | 1   | 1   | 3   | 2   |
| 2             | Reinheimer        | 9             | 1     | 0   | 0   | 0   | 2   | 1   | 0   | 1   | 2   | 1   | 1   | 0   |
| 3             | Romao             | 3             | 0     | 0   | 1   | 1   | 0   | 0   | 0   | 0   | 1   | 0   | 0   | 0   |
| 13            | Rosales-Hoz       | 13            | 2     | 1   | 1   | 0   | 2   | 0   | 0   | 2   | 2   | 1   | 2   | 0   |
| 11            | Rudolph           | 6             | 0     | 0   | 2   | 0   | 1   | 0   | 0   | 1   | 0   | 1   | 1   | 0   |
| 4             | Sankaranarayanan  | 6             | 0     | 1   | 0   | 1   | 3   | 0   | 0   | 0   | 0   | 1   | 0   | 0   |
| 1             | Schiltz           | 3             | 0     | 0   | 1   | 0   | 0   | 0   | 1   | 0   | 1   | 0   | 0   | 0   |
| 12            | Schulzke          | 21            | 1     | 2   | 3   | 0   | 2   | 2   | 3   | 2   | 0   | 1   | 3   | 2   |
| 0             | Shimon            | 1             | 0     | 0   | 0   | 0   | 0   | 0   | 0   | 0   | 0   | 0   | 0   | 1   |
| 2             | Singer            | 1             | 0     | 0   | 0   | 0   | 1   | 0   | 0   | 0   | 0   | 0   | 0   | 0   |
| 0             | Smith             | 1             | 0     | 0   | 0   | 0   | 0   | 0   | 0   | 0   | 1   | 0   | 0   | 0   |
| 0             | Stanfield         | 1             | 0     | 0   | 1   | 0   | 0   | 0   | 0   | 0   | 0   | 0   | 0   | 0   |
| 9             | Strater           | 6             | 0     | 0   | 2   | 1   | 1   | 0   | 0   | 2   | 0   | 0   | 0   | 0   |
| 0             | Suescun           | 2             | 0     | 0   | 0   | 0   | 0   | 0   | 0   | 0   | 0   | 1   | 1   | 0   |
| 15            | Therrien          | 18            | 1     | 1   | 3   | 1   | 2   | 1   | 2   | 1   | 3   | 2   | 1   | 0   |
| 6             | Turner            | 5             | 1     | 1   | 1   | 0   | 1   | 0   | 0   | 0   | 0   | 0   | 0   | 1   |
| 18            | Van Meervelt      | 18            | 1     | 1   | 2   | 2   | 2   | 1   | 2   | 3   | 0   | 1   | 2   | 1   |
| 8             | Vartaniants       | 6             | 1     | 0   | 0   | 2   | 1   | 0   | 0   | 0   | 1   | 1   | 0   | 0   |
| 5             | Vinothkumar       | 2             | 0     | 0   | 0   | 2   | 0   | 0   | 0   | 0   | 0   | 0   | 0   | 0   |
| 4             | Vollmar           | 1             | 0     | 0   | 0   | 0   | 0   | 0   | 0   | 1   | 0   | 0   | 0   | 0   |
| 7             | Wakatsuki         | 4             | 0     | 1   | 0   | 0   | 0   | 1   | 0   | 0   | 1   | 0   | 0   | 1   |
| 0             | Wang              | 3             | 0     | 0   | 0   | 0   | 1   | 0   | 0   | 1   | 1   | 0   | 0   | 0   |
| 0             | Waterman          | 6             | 1     | 0   | 0   | 0   | 1   | 0   | 2   | 0   | 1   | 0   | 0   | 1   |
| 36            | Weil              | 39            | 5     | 3   | 3   | 4   | 2   | 0   | 4   | 5   | 5   | 3   | 4   | 1   |
| 0             | White             | 2             | 0     | 0   | 0   | 1   | 0   | 0   | 1   | 0   | 0   | 0   | 0   | 0   |
| 5             | Williams          | 4             | 0     | 0   | 2   | 0   | 0   | 0   | 2   | 0   | 0   | 0   | 0   | 0   |
| 2             | Willmott          | 6             | 0     | 0   | 1   | 0   | 0   | 1   | 1   | 0   | 0   | 2   | 1   | 0   |

## 2.8. Acta Crystallographica

| 2022<br>Total | Co-editor   | 2023<br>Total | Month |     |     |     |     |     |     |     |     |     |     |     |
|---------------|-------------|---------------|-------|-----|-----|-----|-----|-----|-----|-----|-----|-----|-----|-----|
|               |             |               | Jan   | Feb | Mar | Apr | May | Jun | Jul | Aug | Sep | Oct | Nov | Dec |
| 8             | Yakubovich  | 6             | 1     | 0   | 1   | 1   | 0   | 0   | 0   | 0   | 0   | 1   | 1   | 1   |
| 6             | Yap         | 4             | 0     | 1   | 0   | 1   | 1   | 0   | 0   | 0   | 0   | 0   | 0   | 1   |
| 8             | Yousufuddin | 7             | 0     | 0   | 1   | 1   | 1   | 0   | 1   | 0   | 1   | 1   | 1   | 0   |
| 16            | Zeller      | 13            | 0     | 2   | 3   | 0   | 1   | 1   | 2   | 1   | 1   | 2   | 0   | 0   |
| 0             | Zema        | 2             | 0     | 0   | 0   | 0   | 0   | 0   | 0   | 1   | 1   | 0   | 0   | 0   |
| 0             | Zheng       | 3             | 0     | 0   | 0   | 0   | 0   | 0   | 0   | 0   | 1   | 0   | 1   | 1   |
| 3             | de Boissieu | 2             | 0     | 1   | 0   | 0   | 0   | 0   | 0   | 1   | 0   | 0   | 0   | 0   |
| 6             | van Raaij   | 7             | 0     | 0   | 0   | 0   | 1   | 0   | 2   | 1   | 0   | 1   | 1   | 1   |
| 860           | Totals      | 799           | 69    | 77  | 76  | 58  | 69  | 49  | 76  | 58  | 62  | 70  | 78  | 57  |

## 2.9. Journal of Applied Crystallography

| 2022<br>Total | Co-editor   | 2023<br>Total | Month |     |     |     |     |     |     |     |     |     |     |     |
|---------------|-------------|---------------|-------|-----|-----|-----|-----|-----|-----|-----|-----|-----|-----|-----|
|               |             |               | Jan   | Feb | Mar | Apr | May | Jun | Jul | Aug | Sep | Oct | Nov | Dec |
| 18            | Barty       | 23            | 2     | 0   | 2   | 0   | 2   | 2   | 2   | 3   | 2   | 2   | 3   | 3   |
| 26            | Borbely     | 27            | 2     | 1   | 3   | 2   | 3   | 2   | 2   | 1   | 2   | 3   | 2   | 4   |
| 23            | Boutet      | 21            | 0     | 1   | 2   | 0   | 2   | 3   | 2   | 3   | 2   | 2   | 2   | 2   |
| 19            | Brand       | 20            | 1     | 3   | 1   | 1   | 2   | 3   | 2   | 2   | 1   | 3   | 0   | 1   |
| 4             | Dawe        | 3             | 0     | 0   | 0   | 0   | 1   | 0   | 1   | 1   | 0   | 0   | 0   | 0   |
| –             | Disch*      | 3             | 0     | 0   | 0   | 0   | 0   | 0   | 0   | 0   | 0   | 0   | 2   | 1   |
| 0             | Fitch       | 1             | 0     | 0   | 0   | 0   | 0   | 0   | 0   | 0   | 0   | 1   | 0   | 0   |
| 11            | Forsyth     | 7             | 0     | 1   | 1   | 1   | 1   | 1   | 1   | 0   | 0   | 0   | 0   | 1   |
| 16            | Garcia-Ruiz | 14            | 1     | 2   | 2   | 2   | 2   | 2   | 1   | 0   | 2   | 0   | 0   | 0   |
| 14            | Gilbert     | 19            | 2     | 1   | 3   | 3   | 3   | 1   | 0   | 0   | 0   | 3   | 2   | 1   |
| 6             | Hajdu       | 20            | 0     | 2   | 1   | 1   | 2   | 2   | 2   | 2   | 2   | 0   | 2   | 4   |
| 23            | Ilavsky     | 23            | 0     | 10  | 0   | 0   | 0   | 0   | 2   | 2   | 2   | 3   | 2   | 2   |
| 18            | Keckes      | 24            | 2     | 3   | 2   | 1   | 2   | 2   | 2   | 1   | 2   | 2   | 2   | 3   |
| 0             | Lightfoot   | 1             | 0     | 0   | 0   | 0   | 0   | 0   | 0   | 0   | 1   | 0   | 0   | 0   |
| 14            | Liu         | 20            | 1     | 2   | 2   | 0   | 2   | 2   | 2   | 1   | 1   | 2   | 2   | 3   |
| 17            | McIntyre    | 18            | 1     | 2   | 0   | 0   | 1   | 1   | 3   | 1   | 2   | 4   | 0   | 3   |
| 17            | Meilleur    | 16            | 1     | 1   | 0   | 1   | 1   | 1   | 2   | 2   | 2   | 1   | 2   | 2   |
| 0             | Meneau      | 8             | 0     | 7   | 1   | 0   | 0   | 0   | 0   | 0   | 0   | 0   | 0   | 0   |
| 5             | Moggach     | 11            | 1     | 0   | 0   | 1   | 1   | 1   | 1   | 1   | 2   | 1   | 1   | 1   |
| 0             | Munshi      | 6             | 0     | 0   | 0   | 0   | 0   | 0   | 0   | 0   | 0   | 2   | 2   | 2   |
| 3             | Nespolo     | 1             | 0     | 0   | 0   | 1   | 0   | 0   | 0   | 0   | 0   | 0   | 0   | 0   |
| 8             | Pearson     | 2             | 1     | 0   | 1   | 0   | 0   | 0   | 0   | 0   | 0   | 0   | 0   | 0   |
| 17            | Sato        | 16            | 0     | 1   | 1   | 1   | 2   | 2   | 1   | 1   | 1   | 0   | 3   | 3   |
| 0             | Smith       | 1             | 0     | 0   | 1   | 0   | 0   | 0   | 0   | 0   | 0   | 0   | 0   | 0   |
| 0             | Trewhella   | 3             | 0     | 0   | 3   | 0   | 0   | 0   | 0   | 0   | 0   | 0   | 0   | 0   |
| 275           | Totals      | 317           | 17    | 38  | 27  | 15  | 28  | 26  | 26  | 21  | 25  | 29  | 29  | 36  |

2.10. *Journal of Synchrotron Radiation*

| 2022<br>Total | Co-editor     | 2023<br>Total | Month |     |     |     |     |     |     |     |     |     |     |     |
|---------------|---------------|---------------|-------|-----|-----|-----|-----|-----|-----|-----|-----|-----|-----|-----|
|               |               |               | Jan   | Feb | Mar | Apr | May | Jun | Jul | Aug | Sep | Oct | Nov | Dec |
| 21            | Amemiya       | 15            | 0     | 0   | 2   | 1   | 3   | 0   | 3   | 0   | 0   | 2   | 2   | 2   |
| 7             | Aranda        | 13            | 0     | 2   | 2   | 1   | 0   | 2   | 1   | 1   | 1   | 1   | 1   | 1   |
| 10            | Bergamaschi   | 16            | 0     | 1   | 2   | 1   | 1   | 1   | 2   | 1   | 1   | 3   | 2   | 1   |
| 10            | Bhattacharyya | 13            | 1     | 1   | 0   | 2   | 1   | 0   | 2   | 2   | 2   | 2   | 0   | 0   |
| 12            | Favre-Nicolin | 6             | 0     | 1   | 1   | 0   | 0   | 2   | 1   | 1   | 0   | 0   | 0   | 0   |
| 8             | Jeng          | 7             | 0     | 0   | 0   | 1   | 0   | 1   | 2   | 1   | 0   | 1   | 1   | 0   |
| 7             | Kelly         | 16            | 0     | 2   | 2   | 1   | 1   | 1   | 0   | 2   | 2   | 1   | 2   | 2   |
| 19            | Kvashnina     | 22            | 1     | 1   | 5   | 1   | 2   | 3   | 1   | 2   | 1   | 1   | 1   | 3   |
| 15            | Momose        | 12            | 0     | 0   | 1   | 2   | 2   | 0   | 0   | 0   | 2   | 1   | 2   | 2   |
| 8             | Stevenson     | 11            | 0     | 0   | 1   | 1   | 1   | 1   | 1   | 0   | 0   | 2   | 2   | 2   |
| 11            | Strange       | 4             | 1     | 1   | 0   | 1   | 0   | 0   | 0   | 0   | 0   | 0   | 1   | 0   |
| 12            | Svensson      | 7             | 3     | 1   | 1   | 0   | 1   | 0   | 1   | 0   | 0   | 0   | 0   | 0   |
| –             | Tiedtke*      | 1             | 0     | 0   | 0   | 0   | 0   | 0   | 0   | 0   | 0   | 0   | 0   | 1   |
| 4             | Wang          | 10            | 0     | 0   | 3   | 0   | 1   | 0   | 1   | 0   | 3   | 1   | 1   | 0   |
| –             | Weik*         | 1             | 0     | 0   | 0   | 0   | 0   | 0   | 1   | 0   | 0   | 0   | 0   | 0   |
| 16            | Yabashi       | 16            | 1     | 0   | 2   | 2   | 1   | 0   | 0   | 2   | 1   | 2   | 3   | 2   |
| 0             | Yagi          | 2             | 0     | 0   | 0   | 0   | 0   | 0   | 0   | 0   | 0   | 1   | 0   | 1   |
| 13            | Yamamoto      | 7             | 0     | 0   | 1   | 1   | 0   | 0   | 3   | 1   | 0   | 0   | 0   | 1   |
| –             | Zangrando*    | 1             | 0     | 0   | 0   | 0   | 0   | 0   | 0   | 0   | 0   | 0   | 0   | 1   |
| 178           | Totals        | 182           | 7     | 10  | 23  | 15  | 14  | 12  | 19  | 14  | 13  | 18  | 18  | 19  |

\* Guest editors

2.11. *IUCrJ*

| 2022<br>Total | Co-editor    | 2023<br>Total | Month |     |     |     |     |     |     |     |     |     |     |     |
|---------------|--------------|---------------|-------|-----|-----|-----|-----|-----|-----|-----|-----|-----|-----|-----|
|               |              |               | Jan   | Feb | Mar | Apr | May | Jun | Jul | Aug | Sep | Oct | Nov | Dec |
| 1             | Baker        | 3             | 0     | 0   | 0   | 0   | 0   | 1   | 0   | 0   | 0   | 1   | 0   | 1   |
| 2             | Bullitt      | 1             | 0     | 0   | 0   | 0   | 1   | 0   | 0   | 0   | 0   | 0   | 0   | 0   |
| 5             | Cormack      | 1             | 0     | 0   | 1   | 0   | 0   | 0   | 0   | 0   | 0   | 0   | 0   | 0   |
| 3             | Eddaoudi     | 1             | 0     | 0   | 0   | 0   | 0   | 0   | 0   | 0   | 0   | 1   | 0   | 0   |
| 6             | Fitch        | 9             | 0     | 1   | 2   | 0   | 2   | 1   | 0   | 0   | 2   | 0   | 0   | 1   |
| 1             | Forsyth      | 3             | 1     | 0   | 0   | 0   | 0   | 0   | 1   | 1   | 0   | 0   | 0   | 0   |
| 1             | Gemmi        | 3             | 0     | 0   | 0   | 0   | 0   | 0   | 0   | 1   | 0   | 0   | 2   | 0   |
| 2             | Ishikawa     | 5             | 0     | 0   | 0   | 0   | 1   | 1   | 1   | 0   | 1   | 0   | 0   | 1   |
| 11            | Lightfoot    | 7             | 0     | 1   | 0   | 1   | 1   | 1   | 0   | 1   | 0   | 1   | 1   | 0   |
| 8             | Liu          | 8             | 0     | 1   | 0   | 1   | 1   | 0   | 0   | 0   | 1   | 2   | 1   | 1   |
| 6             | MacGillivray | 6             | 0     | 1   | 0   | 0   | 1   | 1   | 1   | 1   | 0   | 0   | 0   | 1   |
| 2             | Maia         | 3             | 0     | 0   | 1   | 0   | 1   | 0   | 0   | 0   | 0   | 0   | 0   | 1   |
| 3             | Meshi        | 2             | 0     | 0   | 0   | 0   | 0   | 0   | 0   | 0   | 0   | 1   | 0   | 1   |
| 2             | Moffat       | 5             | 0     | 1   | 0   | 0   | 2   | 0   | 0   | 0   | 1   | 0   | 0   | 1   |
| 2             | Passmore     | 1             | 0     | 0   | 1   | 0   | 0   | 0   | 0   | 0   | 0   | 0   | 0   | 0   |
| 1             | Peterson     | 4             | 1     | 0   | 0   | 0   | 0   | 2   | 0   | 0   | 1   | 0   | 0   | 0   |
| 1             | Raunser      | 2             | 0     | 0   | 1   | 0   | 0   | 0   | 0   | 0   | 0   | 0   | 0   | 1   |
| 4             | Robinson     | 5             | 0     | 1   | 1   | 0   | 0   | 0   | 1   | 0   | 0   | 0   | 1   | 1   |
| 4             | Smith        | 5             | 0     | 0   | 1   | 0   | 1   | 0   | 0   | 1   | 0   | 0   | 0   | 2   |
| 6             | Su           | 4             | 0     | 0   | 1   | 0   | 0   | 1   | 0   | 0   | 0   | 1   | 0   | 1   |
| 1             | Sun          | 4             | 0     | 0   | 1   | 0   | 0   | 0   | 0   | 1   | 1   | 0   | 0   | 1   |
| 3             | Takata       | 4             | 0     | 0   | 0   | 0   | 0   | 1   | 0   | 0   | 0   | 1   | 1   | 1   |
| 3             | Thorn        | 2             | 1     | 0   | 0   | 0   | 1   | 0   | 0   | 0   | 0   | 0   | 0   | 0   |
| 0             | Williams     | 4             | 0     | 1   | 0   | 0   | 0   | 1   | 0   | 1   | 0   | 1   | 0   | 0   |
| 3             | Zhang        | 2             | 0     | 0   | 0   | 0   | 0   | 0   | 0   | 0   | 0   | 0   | 0   | 2   |
| 1             | Zou          | 1             | 0     | 0   | 0   | 1   | 0   | 0   | 0   | 0   | 0   | 0   | 0   | 0   |
| 105           | Totals       | 110           | 3     | 9   | 11  | 5   | 12  | 13  | 4   | 10  | 7   | 11  | 6   | 19  |

2.12. *IUCrData*

| 2022<br>Total | Co-editor    | 2023<br>Total | Month |     |     |     |     |     |     |     |     |     |     |     |
|---------------|--------------|---------------|-------|-----|-----|-----|-----|-----|-----|-----|-----|-----|-----|-----|
|               |              |               | Jan   | Feb | Mar | Apr | May | Jun | Jul | Aug | Sep | Oct | Nov | Dec |
| 5             | Bernes       | 10            | 1     | 0   | 0   | 2   | 0   | 3   | 1   | 2   | 0   | 1   | 0   | 0   |
| 10            | Bolte        | 16            | 3     | 1   | 3   | 2   | 1   | 0   | 1   | 0   | 0   | 1   | 3   | 1   |
| 3             | Brito        | 2             | 0     | 1   | 0   | 1   | 0   | 0   | 0   | 0   | 0   | 0   | 0   | 0   |
| 2             | Butcher      | 6             | 1     | 0   | 0   | 0   | 1   | 2   | 0   | 1   | 1   | 0   | 0   | 0   |
| 25            | Harrison     | 37            | 0     | 4   | 3   | 1   | 2   | 4   | 6   | 6   | 4   | 5   | 1   | 1   |
| 1             | Imhof        | 6             | 1     | 1   | 0   | 1   | 1   | 0   | 1   | 0   | 0   | 0   | 0   | 1   |
| 2             | Parkin       | 6             | 0     | 1   | 2   | 1   | 0   | 0   | 1   | 0   | 1   | 0   | 0   | 0   |
| 14            | Tiekink      | 12            | 2     | 0   | 2   | 0   | 2   | 1   | 1   | 2   | 1   | 0   | 1   | 0   |
| 6             | Van Meervelt | 7             | 2     | 0   | 2   | 1   | 1   | 0   | 0   | 1   | 0   | 0   | 0   | 0   |
| 21            | Weil         | 23            | 2     | 0   | 2   | 2   | 4   | 1   | 2   | 3   | 3   | 1   | 1   | 2   |
| 2             | Xu           | 5             | 1     | 0   | 0   | 2   | 0   | 0   | 0   | 1   | 0   | 0   | 0   | 1   |
| 4             | Zeller       | 11            | 0     | 0   | 1   | 0   | 1   | 1   | 2   | 3   | 2   | 0   | 1   | 0   |
| 105           | Totals       | 141           | 13    | 8   | 15  | 13  | 13  | 12  | 15  | 19  | 12  | 8   | 7   | 6   |

\* Guest editors



### 3.1. Acta Crystallographica

| 2022<br>Total | Co-editor         | 2023<br>Total | Section A |    |    |    | Section B |    |    |    | Section C |    | Section D |    |    |    | Section E | Section F |
|---------------|-------------------|---------------|-----------|----|----|----|-----------|----|----|----|-----------|----|-----------|----|----|----|-----------|-----------|
|               |                   |               | FA        | SC | LA | BR | FA        | SC | LA | BR | FA        | SC | FA        | SC | LA | BR |           |           |
| 2             | Margiolaki        | 2             | 2         | 0  | 0  | 0  | 0         | 0  | 0  | 0  | 0         | 0  | 0         | 0  | 0  | 0  | 0         | 0         |
| 0             | Massera           | 2             | 0         | 0  | 0  | 0  | 0         | 0  | 0  | 0  | 0         | 0  | 0         | 0  | 0  | 0  | 2         | 0         |
| 0             | Mueller-Dieckmann | 2             | 0         | 0  | 0  | 0  | 0         | 0  | 0  | 0  | 0         | 0  | 2         | 0  | 0  | 0  | 0         | 0         |
| 7             | Nakagawa          | 4             | 0         | 0  | 0  | 0  | 0         | 0  | 0  | 0  | 0         | 0  | 0         | 0  | 0  | 0  | 0         | 4         |
| 9             | Nangia            | 4             | 0         | 0  | 0  | 0  | 4         | 0  | 0  | 0  | 0         | 0  | 0         | 0  | 0  | 0  | 0         | 0         |
| 1             | Neder             | 2             | 0         | 0  | 0  | 0  | 2         | 0  | 0  | 0  | 0         | 0  | 0         | 0  | 0  | 0  | 0         | 0         |
| 5             | Nespolo           | 2             | 0         | 0  | 0  | 1  | 1         | 0  | 0  | 0  | 0         | 0  | 0         | 0  | 0  | 0  | 0         | 0         |
| 1             | Newman            | 5             | 0         | 0  | 0  | 0  | 0         | 0  | 0  | 0  | 0         | 0  | 3         | 0  | 0  | 0  | 0         | 2         |
| 2             | Nicholls          | 5             | 0         | 0  | 0  | 0  | 0         | 0  | 0  | 0  | 0         | 5  | 0         | 0  | 0  | 0  | 0         | 0         |
| 1             | Ohhara            | 1             | 0         | 0  | 0  | 0  | 0         | 0  | 0  | 0  | 1         | 0  | 0         | 0  | 0  | 0  | 0         | 0         |
| 6             | Oliver            | 4             | 0         | 0  | 0  | 0  | 0         | 0  | 0  | 0  | 4         | 0  | 0         | 0  | 0  | 0  | 0         | 0         |
| 5             | Oswald            | 2             | 0         | 0  | 0  | 0  | 0         | 0  | 0  | 0  | 2         | 0  | 0         | 0  | 0  | 0  | 0         | 0         |
| 0             | Ozawa             | 1             | 0         | 0  | 0  | 0  | 0         | 0  | 0  | 0  | 0         | 0  | 0         | 0  | 0  | 0  | 1         | 0         |
| 7             | Palatinus         | 7             | 7         | 0  | 0  | 0  | 0         | 0  | 0  | 0  | 0         | 0  | 0         | 0  | 0  | 0  | 0         | 0         |
| 13            | Parkin            | 23            | 0         | 0  | 0  | 0  | 0         | 0  | 0  | 0  | 0         | 0  | 0         | 0  | 0  | 0  | 23        | 0         |
| 1             | Peuronen          | 2             | 0         | 0  | 0  | 0  | 0         | 0  | 0  | 0  | 2         | 0  | 0         | 0  | 0  | 0  | 0         | 0         |
| 2             | Privé             | 2             | 0         | 0  | 0  | 0  | 0         | 0  | 0  | 0  | 0         | 0  | 0         | 0  | 0  | 0  | 0         | 2         |
| 1             | Raithby           | 1             | 0         | 0  | 0  | 0  | 0         | 0  | 0  | 0  | 0         | 1  | 0         | 0  | 0  | 0  | 0         | 0         |
| 9             | Read              | 8             | 0         | 0  | 0  | 0  | 0         | 0  | 0  | 0  | 0         | 0  | 6         | 2  | 0  | 0  | 0         | 0         |
| 7             | Reddy             | 3             | 0         | 0  | 0  | 0  | 3         | 0  | 0  | 0  | 0         | 0  | 0         | 0  | 0  | 0  | 0         | 0         |
| 12            | Reibenspies       | 15            | 0         | 0  | 0  | 0  | 0         | 0  | 0  | 0  | 0         | 0  | 0         | 0  | 0  | 0  | 15        | 0         |
| 3             | Reinheimer        | 4             | 0         | 0  | 0  | 0  | 0         | 0  | 0  | 0  | 4         | 0  | 0         | 0  | 0  | 0  | 0         | 0         |
| 1             | Romao             | 2             | 0         | 0  | 0  | 0  | 0         | 0  | 0  | 0  | 0         | 0  | 0         | 0  | 0  | 0  | 0         | 2         |
| 8             | Rosales-Hoz       | 6             | 0         | 0  | 0  | 0  | 0         | 0  | 0  | 0  | 6         | 0  | 0         | 0  | 0  | 0  | 0         | 0         |
| 6             | Rudolph           | 2             | 0         | 0  | 0  | 0  | 0         | 0  | 0  | 0  | 0         | 0  | 2         | 0  | 0  | 0  | 0         | 0         |
| 5             | Sankaranarayanan  | 1             | 0         | 0  | 0  | 0  | 0         | 0  | 0  | 0  | 0         | 0  | 0         | 0  | 0  | 0  | 0         | 1         |
| 0             | Schiltz           | 2             | 0         | 0  | 0  | 0  | 0         | 0  | 0  | 0  | 0         | 0  | 2         | 0  | 0  | 0  | 0         | 0         |
| 10            | Schulzke          | 20            | 0         | 0  | 0  | 0  | 0         | 0  | 0  | 0  | 0         | 0  | 0         | 0  | 0  | 0  | 20        | 0         |
| 1             | Sheriff           | 2             | 0         | 0  | 0  | 0  | 0         | 0  | 0  | 0  | 0         | 0  | 0         | 0  | 0  | 0  | 0         | 2         |
| 0             | Smith             | 1             | 0         | 0  | 0  | 0  | 0         | 0  | 0  | 0  | 0         | 0  | 0         | 0  | 0  | 0  | 0         | 1         |
| 0             | Stanfield         | 1             | 0         | 0  | 0  | 0  | 0         | 0  | 0  | 0  | 0         | 0  | 0         | 0  | 0  | 0  | 0         | 1         |
| 4             | Steiner           | 1             | 0         | 0  | 0  | 0  | 0         | 0  | 0  | 0  | 0         | 0  | 1         | 0  | 0  | 0  | 0         | 0         |
| 6             | Strater           | 3             | 0         | 0  | 0  | 0  | 0         | 0  | 0  | 0  | 0         | 0  | 0         | 0  | 0  | 0  | 0         | 3         |
| 0             | Suescun           | 1             | 0         | 0  | 0  | 0  | 0         | 0  | 0  | 0  | 0         | 0  | 0         | 0  | 0  | 0  | 1         | 0         |
| 13            | Therrien          | 17            | 0         | 0  | 0  | 0  | 0         | 0  | 0  | 0  | 0         | 0  | 0         | 0  | 0  | 0  | 17        | 0         |
| 5             | Turner            | 1             | 0         | 0  | 0  | 0  | 0         | 0  | 0  | 0  | 1         | 0  | 0         | 0  | 0  | 0  | 0         | 0         |
| 18            | Van Meervelt      | 17            | 0         | 0  | 0  | 0  | 0         | 0  | 0  | 0  | 0         | 0  | 0         | 0  | 0  | 0  | 17        | 0         |
| 1             | Vinothkumar       | 3             | 0         | 0  | 0  | 0  | 0         | 0  | 0  | 0  | 0         | 0  | 3         | 0  | 0  | 0  | 0         | 0         |
| 1             | Vollmar           | 4             | 0         | 0  | 0  | 0  | 0         | 0  | 0  | 0  | 0         | 0  | 4         | 0  | 0  | 0  | 0         | 0         |
| 4             | Wakatsuki         | 5             | 0         | 0  | 0  | 0  | 0         | 0  | 0  | 0  | 0         | 0  | 5         | 0  | 0  | 0  | 0         | 0         |
| 0             | Wang              | 2             | 0         | 0  | 0  | 0  | 0         | 0  | 0  | 0  | 2         | 0  | 0         | 0  | 0  | 0  | 0         | 0         |
| 0             | Waterman          | 5             | 0         | 0  | 0  | 0  | 0         | 0  | 0  | 0  | 0         | 0  | 4         | 0  | 1  | 0  | 0         | 0         |
| 37            | Weil              | 35            | 0         | 0  | 0  | 0  | 0         | 0  | 0  | 0  | 0         | 0  | 0         | 0  | 0  | 0  | 35        | 0         |
| 0             | White             | 1             | 0         | 0  | 0  | 0  | 0         | 0  | 0  | 0  | 0         | 1  | 0         | 0  | 0  | 0  | 0         | 0         |
| 2             | Williams          | 1             | 0         | 0  | 0  | 0  | 0         | 0  | 0  | 0  | 1         | 0  | 0         | 0  | 0  | 0  | 0         | 0         |
| 3             | Willmott          | 3             | 3         | 0  | 0  | 0  | 0         | 0  | 0  | 0  | 0         | 0  | 0         | 0  | 0  | 0  | 0         | 0         |
| 7             | Yakubovich        | 1             | 0         | 0  | 0  | 0  | 1         | 0  | 0  | 0  | 0         | 0  | 0         | 0  | 0  | 0  | 0         | 0         |
| 4             | Yap               | 3             | 0         | 0  | 0  | 0  | 0         | 0  | 0  | 0  | 3         | 0  | 0         | 0  | 0  | 0  | 0         | 0         |
| 0             | Yousufuddin       | 1             | 0         | 0  | 0  | 0  | 0         | 0  | 0  | 0  | 1         | 0  | 0         | 0  | 0  | 0  | 0         | 0         |
| 8             | Zeller            | 6             | 0         | 0  | 0  | 0  | 0         | 0  | 0  | 0  | 0         | 0  | 0         | 0  | 0  | 0  | 6         | 0         |
| 0             | Zema              | 2             | 0         | 0  | 0  | 0  | 0         | 0  | 0  | 0  | 0         | 0  | 0         | 0  | 0  | 0  | 1         | 0         |
| 0             | Zheng             | 2             | 0         | 0  | 0  | 0  | 0         | 0  | 0  | 0  | 0         | 0  | 0         | 0  | 0  | 0  | 2         | 0         |
| 0             | da Fonseca*       | 1             | 0         | 0  | 0  | 0  | 0         | 0  | 0  | 0  | 0         | 0  | 1         | 0  | 0  | 0  | 0         | 0         |
| 2             | de Boissieu       | 1             | 0         | 0  | 0  | 0  | 1         | 0  | 0  | 0  | 0         | 0  | 0         | 0  | 0  | 0  | 0         | 0         |
| 5             | van Raaij         | 3             | 0         | 0  | 0  | 0  | 0         | 0  | 0  | 0  | 0         | 0  | 0         | 0  | 0  | 0  | 0         | 3         |

#### Totals

| Year   | Total | Section A |    |    |    | Section B |    |    |    | Section C |    | Section D |    |    |    | Section E | Section F |
|--------|-------|-----------|----|----|----|-----------|----|----|----|-----------|----|-----------|----|----|----|-----------|-----------|
|        |       | FA        | SC | LA | BR | FA        | SC | LA | BR | FA        | SC | FA        | SC | LA | BR |           |           |
| (2023) | 543   | 51        | 4  | 1  | 1  | 49        | 0  | 0  | 0  | 56        | 2  | 87        | 4  | 1  | 0  | 250       | 36        |
| (2022) | 633   | 47        | 2  | 0  | 2  | 78        | 7  | 2  | 2  | 91        | 1  | 109       | 1  | 1  | 1  | 239       | 50        |
| (2021) | 732   | 43        | 3  | 1  | 6  | 96        | 4  | 0  | 2  | 98        | 3  | 134       | 3  | 3  | 0  | 271       | 65        |
| (2020) | 884   | 53        | 8  | 2  | 5  | 109       | 3  | 0  | 4  | 130       | 2  | 130       | 3  | 0  | 2  | 352       | 81        |
| (2019) | 981   | 62        | 4  | 0  | 9  | 125       | 1  | 2  | 7  | 203       | 2  | 91        | 1  | 1  | 2  | 385       | 86        |

| Year   | Section A | Section B | Section C | Section D | Section E | Section F |
|--------|-----------|-----------|-----------|-----------|-----------|-----------|
| (2023) | 57        | 49        | 58*       | 92        | 251       | 36        |
| (2022) | 51        | 89        | 92        | 112       | 239       | 50        |
| (2021) | 53        | 102       | 101       | 140       | 271       | 65        |
| (2020) | 68        | 116       | 132       | 135       | 352       | 81        |
| (2019) | 75        | 135       | 205       | 95        | 385       | 86        |

\* Guest editors.

### 3.2. *Journal of Applied Crystallography*

| 2022<br>Total | Co-editor   | 2023<br>Total | FA  | SC | BR | TE | AD | LN | CP |
|---------------|-------------|---------------|-----|----|----|----|----|----|----|
| 16            | Barty       | 3             | 0   | 0  | 0  | 0  | 0  | 0  | 3  |
| 17            | Borbely     | 19            | 16  | 0  | 0  | 0  | 0  | 0  | 3  |
| 17            | Boutet      | 16            | 13  | 0  | 0  | 0  | 0  | 2  | 1  |
| 12            | Brand       | 13            | 9   | 0  | 0  | 0  | 1  | 1  | 2  |
| 2             | Dawe        | 3             | 0   | 0  | 0  | 3  | 0  | 0  | 0  |
| 0             | Fitch       | 1             | 1   | 0  | 0  | 0  | 0  | 0  | 0  |
| 5             | Forsyth     | 7             | 6   | 0  | 0  | 0  | 0  | 0  | 1  |
| 3             | Garcia-Ruiz | 6             | 5   | 0  | 0  | 1  | 0  | 0  | 0  |
| 10            | Gilbert     | 8             | 8   | 0  | 0  | 0  | 0  | 0  | 0  |
| 4             | Hajdu       | 5             | 3   | 2  | 0  | 0  | 0  | 0  | 0  |
| 17            | Ilavsky     | 17            | 8   | 0  | 0  | 0  | 0  | 1  | 8  |
| 7             | Keckes      | 15            | 15  | 0  | 0  | 0  | 0  | 0  | 0  |
| 9             | Liu         | 12            | 8   | 0  | 0  | 0  | 0  | 0  | 4  |
| 13            | McIntyre    | 10            | 10  | 0  | 0  | 0  | 0  | 0  | 0  |
| 10            | Meilleur    | 10            | 9   | 0  | 0  | 0  | 0  | 0  | 1  |
| 0             | Meneau      | 7             | 7   | 0  | 0  | 0  | 0  | 0  | 0  |
| 3             | Moggach     | 6             | 5   | 0  | 0  | 0  | 0  | 0  | 1  |
| 3             | Nespolo     | 2             | 0   | 0  | 2  | 0  | 0  | 0  | 0  |
| 5             | Pearson     | 3             | 2   | 1  | 0  | 0  | 0  | 0  | 0  |
| 10            | Sato        | 10            | 9   | 0  | 0  | 0  | 0  | 0  | 1  |
| 0             | Smith       | 1             | 1   | 0  | 0  | 0  | 0  | 0  | 0  |
| 0             | Trewhella   | 3             | 3   | 0  | 0  | 0  | 0  | 0  | 0  |
|               |             |               |     |    |    |    |    |    |    |
| (2023)        |             | 177           | 138 | 3  | 2  | 4  | 1  | 4  | 25 |
| (2022)        |             | 187           | 145 | 5  | 1  | 3  | 0  | 1  | 24 |
| (2021)        |             | 175           | 127 | 6  | 5  | 9  | 3  | 3  | 20 |
| (2020)        |             | 188           | 144 | 5  | 6  | 4  | 1  | 6  | 20 |
| (2019)        |             | 182           | 128 | 4  | 11 | 5  | 1  | 3  | 22 |

### 3.3. Journal of Synchrotron Radiation

| 2022  |               | 2023  |    |    |    |    |    |    |
|-------|---------------|-------|----|----|----|----|----|----|
| Total | Co-editor     | Total | FA | SC | AD | BL | FE | CP |
| 15    | Amemiya       | 11    | 4  | 0  | 0  | 7  | 0  | 0  |
| 5     | Aranda        | 9     | 7  | 1  | 0  | 0  | 0  | 1  |
| 11    | Bergamaschi   | 9     | 8  | 0  | 1  | 0  | 0  | 0  |
| 10    | Bhattacharyya | 7     | 6  | 0  | 1  | 0  | 0  | 0  |
| 11    | Favre-Nicolin | 6     | 6  | 0  | 0  | 0  | 0  | 0  |
| 9     | Jeng          | 3     | 3  | 0  | 0  | 0  | 0  | 0  |
| 2     | Kelly         | 8     | 3  | 0  | 0  | 4  | 0  | 1  |
| 14    | Kvashnina     | 16    | 8  | 0  | 0  | 7  | 1  | 0  |
| 11    | Momose        | 9     | 9  | 0  | 0  | 0  | 0  | 0  |
| 11    | Stevenson     | 7     | 6  | 0  | 0  | 0  | 0  | 1  |
| 13    | Strange       | 5     | 3  | 0  | 0  | 1  | 0  | 1  |
| 14    | Svensson      | 7     | 7  | 0  | 0  | 0  | 0  | 0  |
| 1     | Wang          | 3     | 2  | 0  | 0  | 0  | 0  | 1  |
| 15    | Yabashi       | 8     | 5  | 2  | 0  | 1  | 0  | 0  |
| 0     | Yagi          | 1     | 1  | 0  | 0  | 0  | 0  | 0  |
| 5     | Yamamoto      | 6     | 6  | 0  | 0  | 0  | 0  | 0  |

|        |     |     |    |   |    |   |   |
|--------|-----|-----|----|---|----|---|---|
| (2023) | 115 | 84  | 3  | 2 | 20 | 1 | 5 |
| (2022) | 154 | 115 | 5  | 5 | 23 | 0 | 5 |
| (2021) | 198 | 146 | 7  | 1 | 34 | 0 | 8 |
| (2020) | 212 | 169 | 14 | 2 | 21 | 0 | 5 |
| (2019) | 249 | 202 | 10 | 4 | 27 | 0 | 3 |

\* Guest editors.

### 3.4. IUCrJ

| 2022  |              | 2023  |    |    |    |    |    |    |    |
|-------|--------------|-------|----|----|----|----|----|----|----|
| Total | Co-editor    | Total | FA | LA | AD | SS | TR | RL | FE |
| 1     | Baker        | 1     | 0  | 1  | 0  | 0  | 0  | 0  | 0  |
| 2     | Bullitt      | 1     | 1  | 0  | 0  | 0  | 0  | 0  | 0  |
| 0     | Catlow       | 1     | 1  | 0  | 0  | 0  | 0  | 0  | 0  |
| 2     | Cormack      | 3     | 3  | 0  | 0  | 0  | 0  | 0  | 0  |
| 3     | Eddaoudi     | 2     | 2  | 0  | 0  | 0  | 0  | 0  | 0  |
| 6     | Fitch        | 4     | 4  | 0  | 0  | 0  | 0  | 0  | 0  |
| 0     | Forsyth      | 3     | 3  | 0  | 0  | 0  | 0  | 0  | 0  |
| 0     | Gemmi        | 1     | 1  | 0  | 0  | 0  | 0  | 0  | 0  |
| 2     | Ishikawa     | 3     | 2  | 0  | 0  | 0  | 1  | 0  | 0  |
| 6     | Lightfoot    | 7     | 5  | 0  | 0  | 0  | 0  | 0  | 2  |
| 6     | Liu          | 5     | 4  | 0  | 0  | 0  | 0  | 1  | 0  |
| 6     | MacGillivray | 5     | 4  | 0  | 0  | 1  | 0  | 0  | 0  |
| 1     | Maia         | 3     | 3  | 0  | 0  | 0  | 0  | 0  | 0  |
| 3     | Meshi        | 1     | 1  | 0  | 0  | 0  | 0  | 0  | 0  |
| 4     | Moffat       | 2     | 2  | 0  | 0  | 0  | 0  | 0  | 0  |
| 0     | Peterson     | 2     | 1  | 0  | 0  | 0  | 1  | 0  | 0  |
| 1     | Rauser       | 1     | 1  | 0  | 0  | 0  | 0  | 0  | 0  |
| 0     | Robinson     | 5     | 4  | 0  | 1  | 0  | 0  | 0  | 0  |
| 1     | Rodriguez    | 1     | 1  | 0  | 0  | 0  | 0  | 0  | 0  |
| 2     | Smith        | 5     | 4  | 0  | 0  | 0  | 1  | 0  | 0  |
| 2     | Su           | 5     | 5  | 0  | 0  | 0  | 0  | 0  | 0  |
| 1     | Sun          | 2     | 1  | 0  | 0  | 0  | 0  | 1  | 0  |
| 2     | Takata       | 3     | 3  | 0  | 0  | 0  | 0  | 0  | 0  |
| 0     | Williams     | 2     | 2  | 0  | 0  | 0  | 0  | 0  | 0  |

|        |     |    |   |   |   |   |    |   |
|--------|-----|----|---|---|---|---|----|---|
| (2023) | 68  | 58 | 1 | 1 | 1 | 3 | 2  | 2 |
| (2022) | 60  | 51 | 0 | 1 | 0 | 2 | 6  | 0 |
| (2021) | 94  | 83 | 1 | 0 | 0 | 3 | 5  | 2 |
| (2020) | 105 | 94 | 1 | 0 | 0 | 2 | 6  | 1 |
| (2019) | 111 | 94 | 0 | 2 | 0 | 4 | 10 | 1 |

### 3.5. IUCrData

| 2022  |                 | 2023  |    |    |    |    |
|-------|-----------------|-------|----|----|----|----|
| Total | Co-editor       | Total | HM | HI | RD | HO |
| 5     | Bernes          | 11    | 6  | 1  | 0  | 4  |
| 9     | Bolte           | 15    | 3  | 0  | 0  | 12 |
| 3     | Brito           | 2     | 0  | 0  | 0  | 2  |
| 1     | Butcher         | 5     | 2  | 0  | 0  | 3  |
| 23    | Harrison        | 34    | 3  | 1  | 0  | 30 |
| 2     | Imhof           | 5     | 2  | 0  | 0  | 3  |
| 0     | Kroon-Batenburg | 1     | 0  | 0  | 1  | 0  |
| 1     | Parkin          | 3     | 2  | 0  | 0  | 1  |
| 13    | Tiekink         | 9     | 4  | 0  | 0  | 5  |
| 7     | Van Meervelt    | 7     | 1  | 0  | 0  | 6  |
| 19    | Weil            | 20    | 12 | 5  | 0  | 3  |
| 1     | Xu              | 4     | 1  | 0  | 0  | 3  |
| 3     | Zeller          | 6     | 4  | 0  | 0  | 2  |

|        |     |    |   |   |     |
|--------|-----|----|---|---|-----|
| (2023) | 122 | 40 | 7 | 1 | 74  |
| (2022) | 96  | 35 | 3 | 2 | 56  |
| (2021) | 92  | 35 | 6 | 0 | 51  |
| (2020) | 139 | 36 | 6 | 0 | 94  |
| (2019) | 163 | 55 | 3 | 0 | 102 |

The columns are headed as follows: FA, Regular Contributed Papers (Regular Structural Papers, Section C); SC, Short Communications (Electronic Papers, Addenda & Errata, Section C); LA, Lead and Feature Articles; BR, Book Reviews (including Books Received); CP, Computer Programs; LN, Laboratory Notes; LE, Letters to the Editor; MR, Meeting Reports; CN, Cryocrystallography Notes; NP, New Commercial Products; CA, CIF Applications.

The Section A/B/C/D/E/F classification may not be entirely correct for those papers still in press. Items that are missing are items that are not processed via the submission system and include: IUCr Notices, Obituaries, Crystallographers and Notes and News items. The totals are:

| Section A | Section B | Section C | Section D | Section E | Section F | JAC | JSR | IUCrJ |
|-----------|-----------|-----------|-----------|-----------|-----------|-----|-----|-------|
| 7         | 9         | 7         | 10        | 2         | 5         | 10  | 2   | 15    |

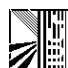

## 4. Lengths of papers and publication times in IUCr journals

### 4.1. *Acta Crystallographica*

|                  | Size (pages) | Full Articles*  |                        |                              |                               |                                   | Short Communications** |                        |                              |                               |                                   |     |     |
|------------------|--------------|-----------------|------------------------|------------------------------|-------------------------------|-----------------------------------|------------------------|------------------------|------------------------------|-------------------------------|-----------------------------------|-----|-----|
|                  |              | Number of pages | Average length (pages) | Average review time (months) | Average editing time (months) | Average publication time (months) | Number of pages        | Average length (pages) | Average review time (months) | Average editing time (months) | Average publication time (months) |     |     |
| <b>Section A</b> |              |                 |                        |                              |                               |                                   |                        |                        |                              |                               |                                   |     |     |
| 2023             | 601          | 46              | 518                    | 11.3                         | 4.5                           | 1.6                               | 6.1                    | 9                      | 83                           | 9.2                           | 6.8                               | 1.3 | 8.0 |
| 2022             | 519          | 43              | 448                    | 10.4                         | 4.4                           | 1.5                               | 6.0                    | 14                     | 71                           | 5.1                           | 1.7                               | 1.1 | 2.8 |
| 2021             | 638          | 51              | 600                    | 11.8                         | 4.1                           | 1.8                               | 5.9                    | 14                     | 38                           | 2.7                           | 4.5                               | 1.3 | 5.8 |
| 2020             | 783          | 56              | 639                    | 11.4                         | 4.4                           | 1.8                               | 6.2                    | 23                     | 144                          | 6.3                           | 2.9                               | 1.5 | 4.5 |
| 2019             | 918          | 75              | 851                    | 11.3                         | 4.1                           | 2.1                               | 6.1                    | 13                     | 67                           | 5.2                           | 4.4                               | 2.4 | 6.8 |
| <b>Section B</b> |              |                 |                        |                              |                               |                                   |                        |                        |                              |                               |                                   |     |     |
| 2023             | 546          | 53              | 528                    | 10.0                         | 3.6                           | 1.0                               | 4.6                    | 10                     | 18                           | 1.8                           | 0.2                               | 0.5 | 0.7 |
| 2022             | 892          | 83              | 856                    | 10.3                         | 3.3                           | 1.4                               | 4.7                    | 12                     | 36                           | 3.0                           | 2.4                               | 1.2 | 3.7 |
| 2021             | 1054         | 102             | 1023                   | 10.0                         | 2.9                           | 1.6                               | 4.5                    | 10                     | 31                           | 3.1                           | 1.5                               | 0.6 | 2.1 |
| 2020             | 1147         | 107             | 1124                   | 10.5                         | 3.2                           | 1.4                               | 4.6                    | 10                     | 23                           | 2.3                           | 2.4                               | 0.5 | 2.9 |
| 2019             | 1227         | 124             | 1197                   | 9.7                          | 3.3                           | 1.9                               | 5.2                    | 12                     | 19                           | 1.6                           | 5.1                               | 0.5 | 5.6 |
| <b>Section C</b> |              |                 |                        |                              |                               |                                   |                        |                        |                              |                               |                                   |     |     |
| 2023             | 529          | 62              | 521                    | 8.4                          | 2.4                           | 0.5                               | 2.9                    | 5                      | 8                            | 1.6                           | 0.1                               | 0.5 | 0.6 |
| 2022             | 759          | 93              | 753                    | 8.1                          | 2.3                           | 0.4                               | 2.7                    | 3                      | 6                            | 2.0                           | 0.0                               | 0.3 | 0.3 |
| 2021             | 815          | 98              | 791                    | 8.1                          | 2.3                           | 0.4                               | 2.8                    | 7                      | 24                           | 3.4                           | 0.7                               | 0.3 | 1.0 |
| 2020             | 1107         | 137             | 1098                   | 8.0                          | 2.4                           | 0.4                               | 2.9                    | 6                      | 9                            | 1.5                           | 0.8                               | 0.1 | 0.9 |
| 2019             | 1697         | 190             | 1555                   | 8.2                          | 2.2                           | 0.6                               | 2.8                    | 7                      | 13                           | 1.9                           | 0.5                               | 0.2 | 0.7 |
| <b>Section D</b> |              |                 |                        |                              |                               |                                   |                        |                        |                              |                               |                                   |     |     |
| 2023             | 1119         | 92              | 1078                   | 11.7                         | 3.7                           | 1.1                               | 4.8                    | 13                     | 41                           | 3.2                           | 0.8                               | 0.6 | 1.4 |
| 2022             | 1473         | 126             | 1457                   | 11.6                         | 3.7                           | 1.2                               | 4.9                    | 3                      | 16                           | 5.3                           | 4.0                               | 0.7 | 4.7 |
| 2021             | 1623         | 136             | 1597                   | 11.7                         | 4.0                           | 1.4                               | 5.4                    | 10                     | 26                           | 2.6                           | 0.7                               | 0.3 | 1.1 |
| 2020             | 1279         | 119             | 1251                   | 10.5                         | 3.6                           | 1.1                               | 4.7                    | 10                     | 28                           | 2.8                           | 1.3                               | 0.3 | 1.6 |
| 2019             | 1147         | 103             | 1120                   | 10.9                         | 3.7                           | 1.2                               | 4.9                    | 9                      | 27                           | 3.0                           | 1.1                               | 0.5 | 1.6 |

#### 4.1. Acta Crystallographica

| Size (pages)     | Full Articles*  |                        |                              |                               |                                   | Short Communications** |                 |                        |                              |                               |                                   |     |     |
|------------------|-----------------|------------------------|------------------------------|-------------------------------|-----------------------------------|------------------------|-----------------|------------------------|------------------------------|-------------------------------|-----------------------------------|-----|-----|
|                  | Number of pages | Average length (pages) | Average review time (months) | Average editing time (months) | Average publication time (months) | Number                 | Number of pages | Average length (pages) | Average review time (months) | Average editing time (months) | Average publication time (months) |     |     |
| <b>Section E</b> |                 |                        |                              |                               |                                   |                        |                 |                        |                              |                               |                                   |     |     |
| 2023             | 1227            | 240                    | 1223                         | 5.1                           | 1.3                               | 0.3                    | 1.6             | 2                      | 4                            | 2.0                           | 0.1                               | 0.0 | 0.1 |
| 2022             | 1288            | 254                    | 1280                         | 5.0                           | 1.2                               | 0.3                    | 1.6             | 7                      | 8                            | 1.1                           | 0.1                               | 0.2 | 0.3 |
| 2021             | 1329            | 262                    | 1327                         | 5.1                           | 1.0                               | 0.3                    | 1.3             | 1                      | 2                            | 2.0                           | 0.0                               | 1.1 | 1.1 |
| 2020             | 1875            | 363                    | 1862                         | 5.1                           | 0.9                               | 0.3                    | 1.1             | 2                      | 2                            | 1.0                           | 0.2                               | 1.7 | 1.9 |
| 2019             | 1952            | 391                    | 1940                         | 5.0                           | 1.0                               | 0.3                    | 1.3             | 1                      | 1                            | 1.0                           | 0.0                               | 0.8 | 0.8 |
| <b>Section F</b> |                 |                        |                              |                               |                                   |                        |                 |                        |                              |                               |                                   |     |     |
| 2023             | 307             | 37                     | 286                          | 7.7                           | 2.7                               | 0.7                    | 3.3             | 4                      | 8                            | 2.0                           | 0.0                               | 0.2 | 0.2 |
| 2022             | 422             | 53                     | 420                          | 7.9                           | 2.0                               | 0.6                    | 2.7             | 2                      | 2                            | 1.0                           | 0.1                               | 0.3 | 0.4 |
| 2021             | 483             | 61                     | 478                          | 7.8                           | 2.3                               | 0.6                    | 2.8             | 3                      | 5                            | 1.7                           | 0.0                               | 0.1 | 0.1 |
| 2020             | 623             | 75                     | 566                          | 7.5                           | 2.2                               | 0.6                    | 2.8             | 10                     | 49                           | 4.9                           | 1.0                               | 0.6 | 1.6 |
| 2019             | 757             | 98                     | 725                          | 7.4                           | 2.9                               | 1.0                    | 3.9             | 7                      | 26                           | 3.7                           | 0.9                               | 0.4 | 1.3 |

\* Including Lead and Feature Articles for Sections A, B and D.

\*\* Including Addenda & Errata, Letters to the Editor, IUCr Notices, Notes and News, Books Reviewed, Books Received, Obituaries, Scientific Comments, Current Events and Editorials.

| Size (pages) | Full Articles* |                 |                        |                              | Short Communications**        |                                   |        |                 | Short Items†           |        |                 |                        |                              |                               |
|--------------|----------------|-----------------|------------------------|------------------------------|-------------------------------|-----------------------------------|--------|-----------------|------------------------|--------|-----------------|------------------------|------------------------------|-------------------------------|
|              | Number         | Number of pages | Average length (pages) | Average review time (months) | Average editing time (months) | Average publication time (months) | Number | Number of pages | Average length (pages) | Number | Number of pages | Average length (pages) | Average review time (months) | Average editing time (months) |

#### 4.2. Journal of Applied Crystallography

|      |      |     |      |      |     |     |     |    |     |     |    |    |     |     |     |
|------|------|-----|------|------|-----|-----|-----|----|-----|-----|----|----|-----|-----|-----|
| 2023 | 1884 | 154 | 1574 | 10.2 | 4.8 | 1.2 | 6.0 | 30 | 274 | 9.1 | 14 | 36 | 2.6 | 1.8 | 2.8 |
| 2022 | 1706 | 142 | 1447 | 10.2 | 4.4 | 1.7 | 6.1 | 28 | 239 | 8.5 | 5  | 20 | 4.0 | 2.3 | 3.2 |
| 2021 | 1902 | 152 | 1599 | 10.5 | 4.1 | 1.7 | 5.8 | 35 | 251 | 7.2 | 15 | 52 | 3.5 | 3.5 | 4.6 |
| 2020 | 1631 | 135 | 1323 | 9.8  | 4.3 | 1.4 | 5.7 | 32 | 248 | 7.8 | 21 | 60 | 2.9 | 2.0 | 3.2 |
| 2019 | 1468 | 106 | 1031 | 9.7  | 4.2 | 1.4 | 5.6 | 24 | 165 | 6.9 | 16 | 53 | 3.3 | 2.3 | 3.2 |

#### 4.3. Journal of Synchrotron Radiation

|      |      |     |      |     |     |     |     |    |     |     |   |    |     |     |     |
|------|------|-----|------|-----|-----|-----|-----|----|-----|-----|---|----|-----|-----|-----|
| 2023 | 1183 | 117 | 1129 | 9.6 | 4.0 | 1.3 | 5.3 | 9  | 42  | 4.7 | 3 | 12 | 4.0 | 1.0 | 2.1 |
| 2022 | 1503 | 149 | 1396 | 9.4 | 4.2 | 1.1 | 5.3 | 18 | 103 | 5.7 | 2 | 4  | 2.0 | 0.0 | 0.6 |
| 2021 | 2002 | 191 | 1896 | 9.9 | 4.0 | 1.3 | 5.3 | 20 | 93  | 4.7 | 4 | 13 | 3.2 | 0.5 | 1.0 |
| 2020 | 1754 | 181 | 1621 | 9.0 | 3.9 | 1.4 | 5.3 | 21 | 119 | 5.7 | 7 | 14 | 2.0 | 0.4 | 1.2 |
| 2019 | 2096 | 232 | 2007 | 8.7 | 4.0 | 1.8 | 5.7 | 16 | 84  | 5.2 | 1 | 5  | 5.0 | 0.0 | 0.0 |

#### 4.4. IUCrJ

|      |      |     |      |      |     |     |     |    |    |     |   |    |     |     |     |
|------|------|-----|------|------|-----|-----|-----|----|----|-----|---|----|-----|-----|-----|
| 2023 | 771  | 63  | 707  | 11.2 | 4.1 | 0.8 | 4.9 | 12 | 44 | 3.7 | 5 | 20 | 4.0 | 0.0 | 0.6 |
| 2022 | 791  | 65  | 714  | 11.0 | 3.9 | 1.0 | 4.9 | 18 | 66 | 3.7 | 6 | 11 | 1.8 | 0.0 | 0.3 |
| 2021 | 1034 | 85  | 956  | 11.2 | 3.3 | 1.2 | 4.5 | 18 | 66 | 3.7 | 3 | 6  | 2.0 | 0.1 | 0.6 |
| 2020 | 1215 | 104 | 1125 | 10.8 | 3.3 | 1.0 | 4.3 | 20 | 81 | 4.0 | 5 | 9  | 1.8 | 0.0 | 0.4 |
| 2019 | 1133 | 97  | 1039 | 10.7 | 3.1 | 1.2 | 4.3 | 17 | 79 | 4.6 | 6 | 15 | 2.5 | 0.0 | 0.2 |

#### 4.5. IUCrData

|      |     |     |     |     |     |     |     |   |   |     |   |   |     |     |     |
|------|-----|-----|-----|-----|-----|-----|-----|---|---|-----|---|---|-----|-----|-----|
| 2023 | 375 | 123 | 375 | 3.0 | 0.8 | 0.3 | 1.0 | 0 | 0 | 0.0 | 0 | 0 | 0.0 | 0.0 | 0.0 |
| 2022 | 291 | 94  | 291 | 3.1 | 1.0 | 0.3 | 1.2 | 0 | 0 | 0.0 | 0 | 0 | 0.0 | 0.0 | 0.0 |
| 2021 | 265 | 94  | 263 | 2.8 | 0.7 | 0.3 | 0.9 | 2 | 2 | 1.0 | 0 | 0 | 0.0 | 0.0 | 0.0 |
| 2020 | 405 | 137 | 403 | 2.9 | 0.7 | 0.3 | 0.9 | 2 | 2 | 1.0 | 0 | 0 | 0.0 | 0.0 | 0.0 |
| 2019 | 459 | 165 | 459 | 2.8 | 0.7 | 0.3 | 0.9 | 0 | 0 | 0.0 | 0 | 0 | 0.0 | 0.0 | 0.0 |

\* Including Lead and Feature Articles and Teaching & Education.

\*\* Including Addenda & Errata, Computer Programs and CIF Applications.

† Including Letters to the Editor, Laboratory Notes, Meeting Report, Cryocrystallography Papers, IUCr Notices, Notes and News, Books Reviewed, Books Received, Obituaries, Crystallographers/Commission Reports, New Products, Abstracts, Current Events and Editorials.

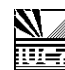

## 5. Survey of the contents of IUCr journals

### 5.1. *Acta Crystallographica*

| Vol. | Year | Number of pages | Number of papers | Full Articles* |                | Short Communications** |                |
|------|------|-----------------|------------------|----------------|----------------|------------------------|----------------|
|      |      |                 |                  | Number         | Average length | Number                 | Average length |
| A75  | 2019 | 918             | 88               | 75             | 11.3           | 13                     | 5.2            |
| B75  |      | 1227            | 136              | 124            | 9.7            | 12                     | 1.6            |
| C75  |      | 1697            | 197              | 190            | 8.2            | 7                      | 1.9            |
| D75  |      | 1147            | 112              | 103            | 10.9           | 9                      | 3.0            |
| E75  |      | 1952            | 392              | 391            | 5.0            | 1                      | 1.0            |
| F75  |      | 757             | 105              | 98             | 7.4            | 7                      | 3.7            |
| A76  | 2020 | 783             | 79               | 56             | 11.4           | 23                     | 6.3            |
| B76  |      | 1147            | 117              | 107            | 10.5           | 10                     | 2.3            |
| C76  |      | 1107            | 143              | 137            | 8.0            | 6                      | 1.5            |
| D76  |      | 1279            | 129              | 119            | 10.5           | 10                     | 2.8            |
| E76  |      | 1875            | 365              | 363            | 5.1            | 2                      | 1.0            |
| F76  |      | 623             | 85               | 75             | 7.5            | 10                     | 4.9            |
| A77  | 2021 | 638             | 65               | 51             | 11.8           | 14                     | 2.7            |
| B77  |      | 1054            | 112              | 102            | 10.0           | 10                     | 3.1            |
| C77  |      | 815             | 105              | 98             | 8.1            | 7                      | 3.4            |
| D77  |      | 1623            | 146              | 136            | 11.7           | 10                     | 2.6            |
| E77  |      | 1329            | 263              | 262            | 5.1            | 1                      | 2.0            |
| F77  |      | 483             | 64               | 61             | 7.8            | 3                      | 1.7            |
| A78  | 2022 | 519             | 57               | 43             | 10.4           | 14                     | 5.1            |
| B78  |      | 892             | 95               | 83             | 10.3           | 12                     | 3.0            |
| C78  |      | 759             | 96               | 93             | 8.1            | 3                      | 2.0            |
| D78  |      | 1473            | 129              | 126            | 11.6           | 3                      | 5.3            |
| E78  |      | 1288            | 261              | 254            | 5.0            | 7                      | 1.1            |
| F78  |      | 422             | 55               | 53             | 7.9            | 2                      | 1.0            |
| A79  | 2023 | 601             | 55               | 46             | 11.3           | 9                      | 9.2            |
| B79  |      | 546             | 63               | 53             | 10.0           | 10                     | 1.8            |
| C79  |      | 529             | 67               | 62             | 8.4            | 5                      | 1.6            |
| D79  |      | 1119            | 105              | 92             | 11.7           | 13                     | 3.2            |
| E79  |      | 1227            | 242              | 240            | 5.1            | 2                      | 2.0            |
| F79  |      | 307             | 41               | 37             | 7.7            | 4                      | 2.0            |

\* Including Lead and Feature Articles for Sections A, B and D.

\*\* Including Addenda & Errata, Letters to the Editor, IUCr Notices, Notes and News, Books Reviewed, Books Received, Obituaries, Scientific Comments, Current Events and Editorials.

+ Numbered pages excluding contents pages.

Volume A60 includes, in addition, 308 pages of abstracts communicated to the 22nd European Crystallography Meeting.

Volume A61 includes, in addition, 498 pages of abstracts communicated to the Florence Congress.

Volume A62 includes, in addition, 311 pages of abstracts communicated to the 23rd European Crystallography Meeting.

Volume A63 includes, in addition, 293 pages of abstracts communicated to the 24th European Crystallography Meeting.

| Vol. | Year | Number<br>of pages+ | Number<br>of papers | Full<br>Articles* |                   | Short<br>Communications** |                   | Short<br>Items† |                   |
|------|------|---------------------|---------------------|-------------------|-------------------|---------------------------|-------------------|-----------------|-------------------|
|      |      |                     |                     | Number            | Average<br>length | Number                    | Average<br>length | Number          | Average<br>length |

### 5.2. *Journal of Applied Crystallography*

|    |      |      |     |     |      |    |     |    |     |
|----|------|------|-----|-----|------|----|-----|----|-----|
| 52 | 2019 | 1468 | 146 | 106 | 9.7  | 24 | 6.9 | 16 | 3.3 |
| 53 | 2020 | 1631 | 188 | 135 | 9.8  | 32 | 7.8 | 21 | 2.9 |
| 54 | 2021 | 1902 | 202 | 152 | 10.5 | 35 | 7.2 | 15 | 3.5 |
| 55 | 2022 | 1706 | 175 | 142 | 10.2 | 28 | 8.5 | 5  | 4.0 |
| 56 | 2023 | 1884 | 198 | 154 | 10.2 | 30 | 9.1 | 14 | 2.6 |

### 5.3. *Journal of Synchrotron Radiation*

|    |      |      |     |     |     |    |     |   |     |
|----|------|------|-----|-----|-----|----|-----|---|-----|
| 26 | 2019 | 2096 | 249 | 232 | 8.7 | 16 | 5.2 | 1 | 5.0 |
| 27 | 2020 | 1754 | 209 | 181 | 9.0 | 21 | 5.7 | 7 | 2.0 |
| 28 | 2021 | 2002 | 215 | 191 | 9.9 | 20 | 4.7 | 4 | 3.2 |
| 29 | 2022 | 1503 | 169 | 149 | 9.4 | 18 | 5.7 | 2 | 2.0 |
| 30 | 2023 | 1183 | 129 | 117 | 9.6 | 9  | 4.7 | 3 | 4.0 |

### 5.4. *IUCrJ*

|    |      |      |     |     |      |    |     |   |     |
|----|------|------|-----|-----|------|----|-----|---|-----|
| 6  | 2019 | 1133 | 120 | 97  | 10.7 | 17 | 4.6 | 6 | 2.5 |
| 7  | 2020 | 1215 | 129 | 104 | 10.8 | 20 | 4.0 | 5 | 1.8 |
| 8  | 2021 | 1034 | 106 | 85  | 11.2 | 18 | 3.7 | 3 | 2.0 |
| 9  | 2022 | 791  | 89  | 65  | 11.0 | 18 | 3.7 | 6 | 1.8 |
| 10 | 2023 | 771  | 80  | 63  | 11.2 | 12 | 3.7 | 5 | 4.0 |

### 5.5. *IUCrData*

|   |      |     |     |     |     |   |     |   |   |
|---|------|-----|-----|-----|-----|---|-----|---|---|
| 4 | 2019 | 459 | 165 | 162 | 2.8 | 3 | 1.0 | - | - |
| 5 | 2020 | 405 | 139 | 137 | 2.9 | 2 | 1.0 | - | - |
| 6 | 2021 | 265 | 95  | 94  | 2.8 | 1 | 1.0 | - | - |
| 7 | 2022 | 291 | 94  | 94  | 3.1 | - | -   | - | - |
| 8 | 2023 | 375 | 123 | 123 | 3.0 | - | -   | - | - |

\* Including Lead and Feature Articles and Teaching & Education.

\*\* Including Addenda & Errata, Computer Programs and CIF Applications.

† Including Letters to the Editor, Laboratory Notes, Meeting Reports, Cryocrystallography Papers, IUCr Notices, Notes and News, Books Reviewed, Books Received, Obituaries, Crystallographers/Commission Reports, New Products, Current Events and Editorials.

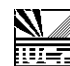

## 6. Distribution of papers and authors, by country

Adhering bodies are marked with asterisks.

### 6.1. Acta Crystallographica Section A

| Country               | Co-editors |        | 2022    |        |            |         | 2023    |        |            |         |
|-----------------------|------------|--------|---------|--------|------------|---------|---------|--------|------------|---------|
|                       | No.        | Papers | Authors | Papers | % of total | Ranking | Authors | Papers | % of total | Ranking |
| Armenia               | 0          | 0      | 1.0     | 1.0    | 2.123      | 16      | 3.0     | 2.0    | 4.000      | 9       |
| Australia*            | 0          | 0      | 3.0     | 1.7    | 3.609      | 9       | 1.0     | 0.2    | 0.500      | 22      |
| Austria*              | 0          | 0      | 6.0     | 0.8    | 1.699      | 21      | 0       | 0      | 0          | –       |
| Brazil*               | 0          | 0      | 4.0     | 1.5    | 3.185      | 11      | 7.0     | 1.7    | 3.429      | 12      |
| Canada*               | 0          | 0      | 3.0     | 1.5    | 3.185      | 11      | 2.0     | 0.7    | 1.333      | 18      |
| China, People's Rep.* | 0          | 0      | 2.0     | 0.4    | 0.849      | 25      | 1.0     | 0.3    | 0.667      | 20      |
| Czechia*              | 1          | 8      | 2.0     | 2.0    | 4.246      | 7       | 7.0     | 2.8    | 5.600      | 5       |
| Denmark*              | 0          | 0      | 13.0    | 3.3    | 7.006      | 2       | 4.0     | 0.8    | 1.600      | 17      |
| France*               | 0          | 0      | 6.5     | 2.4    | 5.096      | 5       | 5.0     | 2.3    | 4.667      | 6       |
| Germany*              | 2          | 3      | 11.0    | 1.9    | 4.034      | 8       | 18.7    | 6.4    | 12.733     | 2       |
| Greece*               | 1          | 3      | 0       | 0      | 0          | –       | 0       | 0      | 0          | –       |
| Hungary*              | 0          | 0      | 0       | 0      | 0          | –       | 1.5     | 0.3    | 0.600      | 21      |
| India*                | 0          | 0      | 1.0     | 1.0    | 2.123      | 16      | 0       | 0      | 0          | –       |
| Israel*               | 0          | 0      | 4.0     | 1.4    | 2.972      | 13      | 0       | 0      | 0          | –       |
| Italy*                | 1          | 9      | 0       | 0      | 0          | –       | 8.0     | 1.6    | 3.214      | 13      |
| Japan*                | 0          | 0      | 4.0     | 3.0    | 6.369      | 3       | 5.0     | 2.2    | 4.400      | 8       |
| Korea, S.*            | 0          | 0      | 1.0     | 1.0    | 2.123      | 16      | 0       | 0      | 0          | –       |
| Netherlands*          | 0          | 0      | 1.5     | 0.5    | 1.062      | 22      | 0       | 0      | 0          | –       |
| New Zealand*          | 0          | 0      | 2.0     | 1.0    | 2.123      | 16      | 0       | 0      | 0          | –       |
| Norway*               | 0          | 0      | 0       | 0      | 0          | –       | 1.0     | 1.0    | 2.000      | 15      |
| Oman                  | 0          | 0      | 2.0     | 0.5    | 1.062      | 22      | 0       | 0      | 0          | –       |
| Philippines           | 1          | 4      | 4.0     | 1.7    | 3.609      | 9       | 3.0     | 2.0    | 4.000      | 9       |
| Poland*               | 1          | 7      | 5.0     | 3.0    | 6.369      | 3       | 4.3     | 2.3    | 4.667      | 6       |
| Russia*               | 0          | 0      | 7.0     | 2.3    | 4.883      | 6       | 5.0     | 2.0    | 4.000      | 9       |
| Serbia*               | 0          | 0      | 7.0     | 1.0    | 2.123      | 16      | 0       | 0      | 0          | –       |
| Slovak Rep.*          | 0          | 0      | 0       | 0      | 0          | –       | 1.0     | 1.0    | 2.000      | 15      |
| South Africa*         | 0          | 0      | 1.0     | 0.1    | 0.212      | 27      | 0       | 0      | 0          | –       |
| Spain*                | 1          | 8      | 3.0     | 1.2    | 2.548      | 15      | 0       | 0      | 0          | –       |
| Sweden*               | 0          | 0      | 0       | 0      | 0          | –       | 4.3     | 1.6    | 3.167      | 14      |
| Switzerland*          | 1          | 1      | 2.0     | 1.3    | 2.760      | 14      | 10.7    | 3.6    | 7.119      | 3       |
| Türkiye               | 0          | 0      | 2.0     | 0.5    | 1.062      | 22      | 2.5     | 0.5    | 1.000      | 19      |
| United Kingdom*       | 3          | 2      | 4.0     | 0.4    | 0.849      | 25      | 13.0    | 3.2    | 6.400      | 4       |
| USA*                  | 2          | 5      | 34.0    | 10.7   | 22.718     | 1       | 31.0    | 11.5   | 22.905     | 1       |

### 6.2. Acta Crystallographica Section B

| Country                 | Co-editors |        | 2022    |        |            |         | 2023    |        |            |         |
|-------------------------|------------|--------|---------|--------|------------|---------|---------|--------|------------|---------|
|                         | No.        | Papers | Authors | Papers | % of total | Ranking | Authors | Papers | % of total | Ranking |
| Argentina*              | 0          | 0      | 6.0     | 1.5    | 1.685      | 17      | 7.0     | 1.5    | 2.830      | 11      |
| Australia*              | 0          | 0      | 10.3    | 3.2    | 3.596      | 9       | 4.0     | 1.0    | 1.887      | 14      |
| Austria*                | 0          | 0      | 8.0     | 1.1    | 1.236      | 18      | 4.5     | 1.7    | 3.263      | 9       |
| Belarus                 | 0          | 0      | 0       | 0      | 0          | –       | 1.0     | 0.1    | 0.270      | 25      |
| Belgium*                | 1          | 3      | 2.0     | 0.1    | 0.112      | 32      | 0       | 0      | 0          | –       |
| Brazil*                 | 0          | 0      | 0       | 0      | 0          | –       | 3.0     | 1.0    | 1.887      | 14      |
| Canada*                 | 1          | 0      | 5.0     | 1.0    | 1.124      | 19      | 0       | 0      | 0          | –       |
| China, People's Rep.*   | 1          | 0      | 25.5    | 4.7    | 5.281      | 8       | 34.0    | 3.0    | 5.660      | 6       |
| Colombia                | 0          | 0      | 2.0     | 0.5    | 0.562      | 27      | 4.0     | 0.8    | 1.415      | 18      |
| Cyprus                  | 0          | 0      | 2.0     | 0.3    | 0.337      | 29      | 0       | 0      | 0          | –       |
| Czechia*                | 1          | 4      | 9.0     | 2.0    | 2.247      | 14      | 2.0     | 0.3    | 0.479      | 23      |
| Denmark*                | 0          | 0      | 9.0     | 2.9    | 3.258      | 10      | 9.0     | 1.8    | 3.459      | 7       |
| Egypt*                  | 0          | 0      | 0       | 0      | 0          | –       | 2.0     | 0.3    | 0.629      | 22      |
| France*                 | 3          | 1      | 50.5    | 11.5   | 12.921     | 1       | 21.0    | 4.1    | 7.655      | 4       |
| Germany*                | 1          | 3      | 21.2    | 7.1    | 7.978      | 5       | 37.5    | 5.9    | 11.094     | 3       |
| Greece*                 | 0          | 0      | 4.0     | 1.0    | 1.124      | 19      | 0       | 0      | 0          | –       |
| India*                  | 2          | 6      | 3.0     | 1.0    | 1.124      | 19      | 16.5    | 3.8    | 7.075      | 5       |
| Iran                    | 0          | 0      | 1.0     | 0.1    | 0.112      | 32      | 4.0     | 1.1    | 2.044      | 13      |
| Italy*                  | 1          | 0      | 6.5     | 2.2    | 2.472      | 12      | 6.0     | 0.9    | 1.617      | 17      |
| Japan*                  | 0          | 0      | 17.5    | 4.9    | 5.506      | 7       | 9.5     | 1.6    | 3.027      | 10      |
| Malaysia*               | 0          | 0      | 1.5     | 0.3    | 0.337      | 29      | 0       | 0      | 0          | –       |
| Mexico*                 | 0          | 0      | 0       | 0      | 0          | –       | 3.0     | 1.0    | 1.887      | 14      |
| Netherlands*            | 0          | 0      | 1.0     | 0.1    | 0.112      | 32      | 0       | 0      | 0          | –       |
| New Zealand*            | 0          | 0      | 0.5     | 0.1    | 0.112      | 32      | 0       | 0      | 0          | –       |
| Norway*                 | 0          | 0      | 2.0     | 0.5    | 0.562      | 27      | 1.0     | 0.1    | 0.145      | 27      |
| Pakistan*               | 0          | 0      | 3.0     | 0.8    | 0.899      | 24      | 0       | 0      | 0          | –       |
| Palestinian Territories | 0          | 0      | 0       | 0      | 0          | –       | 1.0     | 0.1    | 0.145      | 27      |
| Poland*                 | 2          | 8      | 29.5    | 7.7    | 8.652      | 3       | 30.0    | 8.2    | 15.521     | 2       |
| Portugal*               | 0          | 0      | 0       | 0      | 0          | –       | 0.7     | 0.1    | 0.252      | 26      |
| Russia*                 | 3          | 4      | 74.5    | 9.5    | 10.674     | 2       | 57.0    | 10.4   | 19.542     | 1       |
| Serbia*                 | 0          | 0      | 7.0     | 1.0    | 1.124      | 19      | 0       | 0      | 0          | –       |
| Slovenia*               | 0          | 0      | 3.0     | 0.6    | 0.674      | 26      | 0       | 0      | 0          | –       |
| South Africa*           | 0          | 0      | 2.0     | 1.0    | 1.124      | 19      | 0       | 0      | 0          | –       |
| Spain*                  | 0          | 0      | 8.5     | 1.6    | 1.798      | 16      | 0       | 0      | 0          | –       |
| Sweden*                 | 0          | 0      | 0       | 0      | 0          | –       | 1.0     | 0.2    | 0.314      | 24      |
| Switzerland*            | 3          | 16     | 16.5    | 5.8    | 6.517      | 6       | 3.0     | 0.4    | 0.749      | 20      |
| Thailand*               | 0          | 0      | 6.0     | 2.2    | 2.472      | 12      | 0       | 0      | 0          | –       |
| Ukraine                 | 0          | 0      | 11.0    | 2.0    | 2.247      | 14      | 3.0     | 0.4    | 0.809      | 19      |
| United Arab Emirates    | 0          | 0      | 1.0     | 0.2    | 0.225      | 31      | 0       | 0      | 0          | –       |
| United Kingdom*         | 2          | 3      | 14.0    | 2.5    | 2.809      | 11      | 7.8     | 1.8    | 3.365      | 8       |

### 6.2. Acta Crystallographica Section B

| Country    | Co-editors |        | 2022    |        |            |         | 2023    |        |            |         |
|------------|------------|--------|---------|--------|------------|---------|---------|--------|------------|---------|
|            | No.        | Papers | Authors | Papers | % of total | Ranking | Authors | Papers | % of total | Ranking |
| USA*       | 1          | 5      | 41.0    | 7.3    | 8.202      | 4       | 3.5     | 1.2    | 2.274      | 12      |
| Venezuela* | 0          | 0      | 0       | 0      | 0          | –       | 3.0     | 0.4    | 0.708      | 21      |
| Vietnam*   | 0          | 0      | 3.5     | 0.7    | 0.787      | 25      | 0       | 0      | 0          | –       |

### 6.3. Acta Crystallographica Section C

| Country               | Co-editors |        | 2022    |        |            |         | 2023    |        |            |         |
|-----------------------|------------|--------|---------|--------|------------|---------|---------|--------|------------|---------|
|                       | No.        | Papers | Authors | Papers | % of total | Ranking | Authors | Papers | % of total | Ranking |
| Algeria*              | 0          | 0      | 9.0     | 1.4    | 1.496      | 15      | 14.0    | 1.6    | 2.643      | 11      |
| Australia*            | 6          | 7      | 22.0    | 1.7    | 1.816      | 13      | 3.0     | 1.0    | 1.613      | 13      |
| Austria*              | 0          | 0      | 9.5     | 2.8    | 2.991      | 9       | 0       | 0      | 0          | –       |
| Brazil*               | 1          | 10     | 5.0     | 2.0    | 2.137      | 11      | 0       | 0      | 0          | –       |
| Cameroon              | 0          | 0      | 3.0     | 0.4    | 0.427      | 26      | 0       | 0      | 0          | –       |
| Canada*               | 1          | 4      | 3.0     | 1.0    | 1.068      | 20      | 4.0     | 1.0    | 1.613      | 13      |
| China, People's Rep.* | 1          | 1      | 67.0    | 15.0   | 16.026     | 2       | 28.5    | 6.9    | 11.089     | 3       |
| Colombia              | 0          | 0      | 6.0     | 1.1    | 1.175      | 19      | 12.5    | 2.5    | 3.992      | 6       |
| Czechia*              | 0          | 0      | 0       | 0      | 0          | –       | 1.0     | 0.1    | 0.230      | 25      |
| Denmark*              | 0          | 0      | 1.0     | 0.2    | 0.214      | 31      | 0       | 0      | 0          | –       |
| Finland*              | 0          | 0      | 0       | 0      | 0          | –       | 0.5     | 0.2    | 0.269      | 24      |
| France*               | 0          | 0      | 0       | 0      | 0          | –       | 1.0     | 0.2    | 0.403      | 22      |
| Germany*              | 0          | 0      | 25.0    | 6.7    | 7.158      | 5       | 9.0     | 2.9    | 4.704      | 5       |
| Greece*               | 0          | 0      | 0       | 0      | 0          | –       | 3.0     | 0.8    | 1.210      | 21      |
| Hong Kong             | 1          | 1      | 0       | 0      | 0          | –       | 0       | 0      | 0          | –       |
| India*                | 0          | 0      | 34.0    | 7.0    | 7.479      | 4       | 7.0     | 2.0    | 3.226      | 9       |
| Iraq                  | 0          | 0      | 1.0     | 0.3    | 0.321      | 27      | 0       | 0      | 0          | –       |
| Italy*                | 0          | 0      | 5.0     | 1.0    | 1.068      | 20      | 0       | 0      | 0          | –       |
| Japan*                | 1          | 1      | 20.5    | 4.8    | 5.128      | 6       | 3.0     | 1.0    | 1.613      | 13      |
| Kazakhstan            | 0          | 0      | 5.0     | 0.8    | 0.855      | 22      | 0       | 0      | 0          | –       |
| Korea, S.*            | 0          | 0      | 5.0     | 1.3    | 1.389      | 17      | 0       | 0      | 0          | –       |
| Malaysia*             | 0          | 0      | 2.0     | 0.3    | 0.321      | 27      | 0       | 0      | 0          | –       |
| Mexico*               | 1          | 5      | 7.0     | 1.2    | 1.282      | 18      | 11.0    | 2.0    | 3.226      | 9       |
| Netherlands*          | 1          | 0      | 1.0     | 0.2    | 0.214      | 31      | 0.5     | 0.1    | 0.202      | 26      |
| Nigeria               | 0          | 0      | 4.5     | 0.6    | 0.641      | 24      | 0       | 0      | 0          | –       |
| Norway*               | 0          | 0      | 1.0     | 0.3    | 0.321      | 27      | 0       | 0      | 0          | –       |
| Pakistan*             | 0          | 0      | 6.5     | 1.6    | 1.709      | 14      | 4.5     | 0.9    | 1.452      | 19      |
| Poland*               | 0          | 0      | 42.0    | 9.2    | 9.829      | 3       | 52.5    | 9.7    | 15.697     | 2       |
| Portugal*             | 1          | 1      | 0       | 0      | 0          | –       | 0       | 0      | 0          | –       |
| Romania               | 0          | 0      | 10.0    | 2.0    | 2.137      | 11      | 0       | 0      | 0          | –       |
| Russia*               | 0          | 0      | 8.0     | 2.2    | 2.350      | 10      | 4.0     | 1.0    | 1.613      | 13      |
| Saudi Arabia          | 0          | 0      | 0.5     | 0.1    | 0.107      | 34      | 0.5     | 0.1    | 0.161      | 27      |
| Slovak Rep.*          | 0          | 0      | 0       | 0      | 0          | –       | 6.0     | 0.9    | 1.382      | 20      |
| South Africa*         | 1          | 5      | 5.5     | 1.4    | 1.496      | 15      | 2.0     | 1.0    | 1.613      | 13      |
| Spain*                | 1          | 1      | 3.0     | 0.5    | 0.534      | 25      | 9.5     | 2.2    | 3.616      | 7       |
| Sri Lanka             | 0          | 0      | 1.0     | 0.2    | 0.214      | 31      | 1.0     | 0.2    | 0.403      | 22      |
| Switzerland*          | 0          | 0      | 0       | 0      | 0          | –       | 8.0     | 1.4    | 2.195      | 12      |
| Türkiye               | 0          | 0      | 16.0    | 3.0    | 3.205      | 8       | 6.0     | 1.0    | 1.613      | 13      |
| Taiwan*               | 0          | 0      | 5.0     | 0.8    | 0.855      | 22      | 0       | 0      | 0          | –       |
| Ukraine               | 0          | 0      | 2.0     | 0.3    | 0.321      | 27      | 8.5     | 2.0    | 3.255      | 8       |
| United Kingdom*       | 8          | 11     | 14.0    | 3.3    | 3.526      | 7       | 21.5    | 4.4    | 7.136      | 4       |
| USA*                  | 8          | 15     | 82.0    | 18.9   | 20.192     | 1       | 58.0    | 14.8   | 23.832     | 1       |

### 6.4. Acta Crystallographica Section D

| Country               | Co-editors |        | 2022    |        |            |         | 2023    |        |            |         |
|-----------------------|------------|--------|---------|--------|------------|---------|---------|--------|------------|---------|
|                       | No.        | Papers | Authors | Papers | % of total | Ranking | Authors | Papers | % of total | Ranking |
| Argentina*            | 0          | 0      | 4.0     | 0.8    | 0.634      | 23      | 0       | 0      | 0          | –       |
| Australia*            | 3          | 13     | 48.0    | 6.0    | 4.754      | 8       | 6.0     | 2.3    | 2.431      | 10      |
| Austria*              | 0          | 0      | 2.0     | 0.7    | 0.555      | 24      | 0       | 0      | 0          | –       |
| Belarus               | 0          | 0      | 0       | 0      | 0          | –       | 2.5     | 0.2    | 0.163      | 32      |
| Belgium*              | 0          | 0      | 7.0     | 1.2    | 0.951      | 18      | 6.0     | 0.9    | 0.893      | 25      |
| Brazil*               | 1          | 2      | 11.5    | 1.1    | 0.872      | 19      | 8.5     | 1.3    | 1.383      | 18      |
| Canada*               | 1          | 4      | 6.0     | 1.0    | 0.792      | 20      | 2.0     | 0.5    | 0.521      | 28      |
| Chile*                | 0          | 0      | 0.5     | 0.1    | 0.079      | 32      | 0       | 0      | 0          | –       |
| China, People's Rep.* | 0          | 0      | 54.0    | 8.4    | 6.656      | 5       | 28.3    | 5.3    | 5.534      | 4       |
| Czechia*              | 0          | 0      | 21.5    | 3.0    | 2.377      | 13      | 22.7    | 3.0    | 3.143      | 7       |
| Denmark*              | 0          | 0      | 10.5    | 1.9    | 1.506      | 14      | 27.0    | 2.4    | 2.519      | 9       |
| Egypt*                | 0          | 0      | 0.5     | 0.1    | 0.079      | 32      | 0       | 0      | 0          | –       |
| France*               | 3          | 8      | 53.0    | 8.6    | 6.815      | 4       | 36.5    | 4.6    | 4.767      | 6       |
| Germany*              | 1          | 6      | 71.0    | 11.7   | 9.271      | 3       | 66.0    | 12.9   | 13.437     | 2       |
| Greece*               | 0          | 0      | 0       | 0      | 0          | –       | 14.0    | 1.8    | 1.843      | 15      |
| Hong Kong             | 1          | 1      | 0       | 0      | 0          | –       | 0       | 0      | 0          | –       |
| Hungary*              | 0          | 0      | 2.0     | 0.3    | 0.238      | 28      | 0       | 0      | 0          | –       |
| Iceland               | 0          | 0      | 6.0     | 0.4    | 0.317      | 27      | 0       | 0      | 0          | –       |
| India*                | 1          | 3      | 8.0     | 1.7    | 1.347      | 15      | 11.0    | 2.0    | 2.083      | 11      |
| Ireland*              | 0          | 0      | 0       | 0      | 0          | –       | 3.0     | 1.0    | 1.042      | 20      |
| Israel*               | 0          | 0      | 1.0     | 0.2    | 0.158      | 30      | 10.0    | 1.0    | 1.042      | 20      |
| Italy*                | 0          | 0      | 30.5    | 4.5    | 3.566      | 10      | 2.0     | 0.4    | 0.440      | 29      |
| Japan*                | 3          | 4      | 55.0    | 6.8    | 5.388      | 6       | 44.0    | 5.3    | 5.498      | 5       |
| Korea, S.*            | 0          | 0      | 37.0    | 6.2    | 4.913      | 7       | 12.0    | 1.8    | 1.875      | 14      |
| Luxembourg            | 1          | 2      | 0       | 0      | 0          | –       | 0       | 0      | 0          | –       |
| Netherlands*          | 2          | 0      | 3.5     | 0.5    | 0.396      | 25      | 9.0     | 1.3    | 1.395      | 17      |
| New Zealand*          | 0          | 0      | 0       | 0      | 0          | –       | 7.0     | 1.0    | 1.042      | 20      |
| Norway*               | 0          | 0      | 4.0     | 0.3    | 0.238      | 28      | 0       | 0      | 0          | –       |
| Poland*               | 0          | 0      | 25.0    | 3.3    | 2.615      | 12      | 14.0    | 2.0    | 2.083      | 11      |
| Romania               | 0          | 0      | 0.5     | 0.5    | 0.396      | 25      | 0       | 0      | 0          | –       |
| Russia*               | 0          | 0      | 7.8     | 1.4    | 1.109      | 17      | 10.2    | 0.6    | 0.662      | 27      |

#### 6.4. Acta Crystallographica Section D

| Country         | Co-editors |        | 2022    |        |            |         | 2023    |        |            |         |
|-----------------|------------|--------|---------|--------|------------|---------|---------|--------|------------|---------|
|                 | No.        | Papers | Authors | Papers | % of total | Ranking | Authors | Papers | % of total | Ranking |
| Saudi Arabia    | 0          | 0      | 1.3     | 0.1    | 0.079      | 32      | 0.5     | 0.2    | 0.174      | 31      |
| Singapore*      | 0          | 0      | 1.0     | 0.2    | 0.158      | 30      | 0       | 0      | 0          | –       |
| Slovenia*       | 0          | 0      | 0       | 0      | 0          | –       | 2.0     | 1.1    | 1.190      | 19      |
| Spain*          | 0          | 0      | 54.5    | 6.0    | 4.754      | 8       | 22.0    | 1.9    | 2.027      | 13      |
| Sweden*         | 2          | 5      | 35.0    | 1.6    | 1.268      | 16      | 12.0    | 1.5    | 1.527      | 16      |
| Switzerland*    | 1          | 3      | 42.0    | 3.9    | 3.090      | 11      | 13.0    | 2.5    | 2.563      | 8       |
| Türkiye         | 0          | 0      | 9.0     | 1.0    | 0.792      | 20      | 3.2     | 0.8    | 0.825      | 26      |
| Taiwan*         | 0          | 0      | 4.0     | 1.0    | 0.792      | 20      | 8.0     | 0.9    | 0.926      | 24      |
| Thailand*       | 0          | 0      | 0       | 0      | 0          | –       | 8.0     | 1.0    | 1.042      | 20      |
| United Kingdom* | 20         | 29     | 102.7   | 16.9   | 13.391     | 2       | 142.3   | 12.2   | 12.680     | 3       |
| USA*            | 5          | 16     | 147.7   | 24.8   | 19.651     | 1       | 127.3   | 22.0   | 22.942     | 1       |
| Vietnam*        | 0          | 0      | 0       | 0      | 0          | –       | 3.0     | 0.3    | 0.313      | 30      |

#### 6.5. Acta Crystallographica Section E

| Country               | Co-editors |        | 2022    |        |            |         | 2023    |        |            |         |
|-----------------------|------------|--------|---------|--------|------------|---------|---------|--------|------------|---------|
|                       | No.        | Papers | Authors | Papers | % of total | Ranking | Authors | Papers | % of total | Ranking |
| Afghanistan           | 0          | 0      | 0       | 0      | 0          | –       | 1.0     | 0.1    | 0.046      | 52      |
| Algeria*              | 0          | 0      | 24.0    | 4.7    | 1.850      | 15      | 8.0     | 1.6    | 0.655      | 27      |
| Argentina*            | 1          | 0      | 0       | 0      | 0          | –       | 0       | 0      | 0          | –       |
| Australia*            | 0          | 0      | 11.0    | 2.3    | 0.906      | 21      | 8.0     | 2.2    | 0.903      | 20      |
| Austria*              | 1          | 34     | 13.0    | 5.3    | 2.087      | 13      | 20.0    | 5.5    | 2.292      | 13      |
| Azerbaijan            | 0          | 0      | 49.0    | 7.1    | 2.795      | 10      | 68.0    | 9.5    | 3.939      | 6       |
| Bangladesh*           | 0          | 0      | 4.0     | 0.8    | 0.315      | 34      | 12.0    | 2.2    | 0.917      | 19      |
| Belarus               | 0          | 0      | 4.0     | 0.6    | 0.236      | 39      | 0       | 0      | 0          | –       |
| Belgium*              | 1          | 18     | 13.0    | 3.0    | 1.181      | 18      | 3.0     | 0.9    | 0.361      | 39      |
| Brazil*               | 2          | 15     | 8.0     | 1.1    | 0.433      | 28      | 15.0    | 3.0    | 1.250      | 16      |
| Bulgaria*             | 0          | 0      | 0       | 0      | 0          | –       | 2.0     | 0.5    | 0.208      | 43      |
| Canada*               | 0          | 0      | 3.0     | 1.0    | 0.394      | 31      | 7.0     | 2.0    | 0.833      | 23      |
| Chile*                | 0          | 0      | 0       | 0      | 0          | –       | 3.0     | 0.4    | 0.179      | 44      |
| China, People's Rep.* | 1          | 2      | 31.5    | 7.1    | 2.795      | 10      | 4.0     | 1.3    | 0.556      | 30      |
| Colombia              | 0          | 0      | 6.0     | 1.7    | 0.669      | 24      | 0       | 0      | 0          | –       |
| Congo                 | 0          | 0      | 1.0     | 0.1    | 0.039      | 54      | 0       | 0      | 0          | –       |
| Czechia*              | 0          | 0      | 1.0     | 0.2    | 0.079      | 51      | 4.0     | 0.6    | 0.258      | 42      |
| Denmark*              | 0          | 0      | 0       | 0      | 0          | –       | 2.0     | 1.0    | 0.417      | 32      |
| Egypt*                | 0          | 0      | 23.5    | 4.3    | 1.693      | 16      | 22.0    | 5.8    | 2.403      | 11      |
| Ethiopia              | 0          | 0      | 0       | 0      | 0          | –       | 1.0     | 0.2    | 0.083      | 49      |
| France*               | 0          | 0      | 19.0    | 3.9    | 1.535      | 17      | 14.0    | 2.1    | 0.875      | 22      |
| Gabon                 | 0          | 0      | 2.5     | 0.3    | 0.118      | 48      | 0.5     | 0.1    | 0.030      | 54      |
| Germany*              | 1          | 17     | 111.5   | 33.3   | 13.110     | 2       | 105.5   | 36.2   | 15.063     | 2       |
| Hungary*              | 0          | 0      | 5.0     | 1.0    | 0.394      | 31      | 1.0     | 0.1    | 0.060      | 50      |
| India*                | 1          | 4      | 113.0   | 20.4   | 8.031      | 3       | 138.0   | 27.6   | 11.520     | 3       |
| Indonesia*            | 0          | 0      | 1.0     | 0.3    | 0.118      | 48      | 3.0     | 0.8    | 0.312      | 40      |
| Iran                  | 0          | 0      | 0       | 0      | 0          | –       | 4.0     | 0.7    | 0.278      | 41      |
| Iraq                  | 0          | 0      | 1.0     | 0.1    | 0.039      | 54      | 1.0     | 1.0    | 0.417      | 32      |
| Ireland*              | 0          | 0      | 0       | 0      | 0          | –       | 8.5     | 2.8    | 1.181      | 18      |
| Italy*                | 1          | 2      | 2.0     | 0.4    | 0.157      | 46      | 6.0     | 1.4    | 0.597      | 28      |
| Japan*                | 2          | 1      | 59.0    | 14.5   | 5.709      | 5       | 59.0    | 12.9   | 5.361      | 5       |
| Jordan                | 0          | 0      | 0       | 0      | 0          | –       | 1.0     | 0.3    | 0.139      | 46      |
| Kazakhstan            | 0          | 0      | 4.5     | 1.1    | 0.433      | 28      | 0       | 0      | 0          | –       |
| Korea, S.*            | 0          | 0      | 6.0     | 2.0    | 0.787      | 23      | 3.0     | 2.0    | 0.833      | 23      |
| Kuwait                | 0          | 0      | 0       | 0      | 0          | –       | 3.0     | 1.0    | 0.417      | 32      |
| Kyrgyzstan            | 0          | 0      | 0       | 0      | 0          | –       | 0.5     | 0.1    | 0.042      | 53      |
| Malaysia*             | 0          | 0      | 4.0     | 0.7    | 0.276      | 38      | 3.5     | 0.9    | 0.365      | 38      |
| Mauritania            | 0          | 0      | 6.0     | 0.8    | 0.315      | 34      | 0       | 0      | 0          | –       |
| Mexico*               | 1          | 11     | 7.0     | 1.4    | 0.551      | 26      | 5.0     | 1.1    | 0.469      | 31      |
| Moldova               | 0          | 0      | 1.0     | 0.2    | 0.079      | 51      | 0       | 0      | 0          | –       |
| Morocco               | 0          | 0      | 68.5    | 9.2    | 3.622      | 8       | 46.5    | 6.3    | 2.605      | 10      |
| Nepal                 | 0          | 0      | 15.0    | 2.2    | 0.866      | 22      | 28.0    | 4.2    | 1.734      | 14      |
| New Zealand*          | 0          | 0      | 4.0     | 1.4    | 0.551      | 26      | 6.5     | 2.1    | 0.885      | 21      |
| Nigeria               | 0          | 0      | 3.0     | 0.6    | 0.236      | 39      | 0       | 0      | 0          | –       |
| Pakistan*             | 0          | 0      | 3.0     | 0.6    | 0.236      | 39      | 0       | 0      | 0          | –       |
| Poland*               | 0          | 0      | 2.0     | 0.6    | 0.236      | 39      | 2.0     | 0.3    | 0.119      | 47      |
| Portugal*             | 0          | 0      | 0       | 0      | 0          | –       | 2.0     | 0.4    | 0.153      | 45      |
| Romania               | 0          | 0      | 13.0    | 2.7    | 1.063      | 19      | 7.0     | 1.4    | 0.577      | 29      |
| Russia*               | 0          | 0      | 52.0    | 8.7    | 3.425      | 9       | 52.5    | 7.8    | 3.255      | 9       |
| Saudi Arabia          | 0          | 0      | 3.0     | 1.1    | 0.433      | 28      | 1.0     | 1.0    | 0.417      | 32      |
| Senegal               | 0          | 0      | 6.0     | 0.8    | 0.315      | 34      | 23.0    | 2.9    | 1.198      | 17      |
| Slovak Rep.*          | 0          | 0      | 3.0     | 0.8    | 0.315      | 34      | 0       | 0      | 0          | –       |
| Slovenia*             | 0          | 0      | 1.0     | 0.2    | 0.079      | 51      | 2.0     | 1.0    | 0.417      | 32      |
| South Africa*         | 0          | 0      | 0       | 0      | 0          | –       | 3.0     | 1.0    | 0.417      | 32      |
| Spain*                | 0          | 0      | 4.0     | 0.6    | 0.236      | 39      | 0       | 0      | 0          | –       |
| Sweden*               | 0          | 0      | 0       | 0      | 0          | –       | 0.5     | 0.2    | 0.104      | 48      |
| Switzerland*          | 1          | 17     | 6.0     | 1.6    | 0.630      | 25      | 11.0    | 3.3    | 1.393      | 15      |
| Türkiye               | 0          | 0      | 75.0    | 11.6   | 4.567      | 6       | 58.0    | 8.5    | 3.539      | 7       |
| Taiwan*               | 0          | 0      | 3.0     | 1.0    | 0.394      | 31      | 0       | 0      | 0          | –       |
| Tajikistan            | 0          | 0      | 4.0     | 0.6    | 0.236      | 39      | 0       | 0      | 0          | –       |
| Tanzania              | 0          | 0      | 2.0     | 0.3    | 0.118      | 48      | 0       | 0      | 0          | –       |
| Thailand*             | 0          | 0      | 31.0    | 7.0    | 2.756      | 12      | 7.0     | 2.0    | 0.833      | 23      |
| Tunisia*              | 0          | 0      | 1.5     | 0.4    | 0.157      | 46      | 0       | 0      | 0          | –       |
| Ukraine               | 1          | 0      | 84.0    | 15.9   | 6.260      | 4       | 69.0    | 13.9   | 5.812      | 4       |
| United Kingdom*       | 4          | 46     | 24.5    | 4.9    | 1.929      | 14      | 19.5    | 5.8    | 2.400      | 12      |
| Uruguay*              | 1          | 1      | 0       | 0      | 0          | –       | 0       | 0      | 0          | –       |
| USA*                  | 8          | 47     | 199.0   | 47.2   | 18.583     | 1       | 176.0   | 39.6   | 16.511     | 1       |
| Uzbekistan            | 0          | 0      | 68.5    | 11.2   | 4.409      | 7       | 48.0    | 8.4    | 3.482      | 8       |
| Venezuela*            | 3          | 25     | 3.0     | 0.5    | 0.197      | 45      | 0       | 0      | 0          | –       |
| Vietnam*              | 0          | 0      | 0       | 0      | 0          | –       | 9.0     | 2.0    | 0.833      | 23      |
| Yemen                 | 0          | 0      | 16.5    | 2.6    | 1.024      | 20      | 1.0     | 0.1    | 0.060      | 50      |

### 6.6. Acta Crystallographica Section F

| Country               | Co-editors |        | 2022    |        |            |         | 2023    |        |            |         |
|-----------------------|------------|--------|---------|--------|------------|---------|---------|--------|------------|---------|
|                       | No.        | Papers | Authors | Papers | % of total | Ranking | Authors | Papers | % of total | Ranking |
| Argentina*            | 0          | 0      | 1.0     | 0.2    | 0.364      | 15      | 0       | 0      | 0          | –       |
| Australia*            | 1          | 2      | 0       | 0      | 0          | –       | 0       | 0      | 0          | –       |
| Belgium*              | 0          | 0      | 0       | 0      | 0          | –       | 8.0     | 1.7    | 4.633      | 6       |
| Canada*               | 1          | 1      | 8.0     | 3.0    | 5.455      | 7       | 0       | 0      | 0          | –       |
| China, People's Rep.* | 0          | 0      | 16.5    | 3.5    | 6.364      | 5       | 17.0    | 2.7    | 7.207      | 5       |
| Czechia*              | 0          | 0      | 0       | 0      | 0          | –       | 12.0    | 1.0    | 2.703      | 8       |
| Denmark*              | 0          | 0      | 5.0     | 1.0    | 1.818      | 10      | 6.0     | 1.7    | 4.505      | 7       |
| Egypt*                | 0          | 0      | 0.5     | 0.1    | 0.182      | 16      | 0       | 0      | 0          | –       |
| Estonia               | 0          | 0      | 0       | 0      | 0          | –       | 0.3     | 0.0    | 0.129      | 15      |
| Finland*              | 0          | 0      | 2.0     | 1.0    | 1.818      | 10      | 0       | 0      | 0          | –       |
| France*               | 3          | 3      | 0       | 0      | 0          | –       | 5.0     | 1.0    | 2.703      | 8       |
| Germany*              | 2          | 4      | 17.5    | 3.9    | 7.091      | 4       | 12.0    | 3.1    | 8.408      | 3       |
| India*                | 1          | 2      | 11.0    | 3.0    | 5.455      | 7       | 0       | 0      | 0          | –       |
| Indonesia*            | 0          | 0      | 0       | 0      | 0          | –       | 6.0     | 0.9    | 2.317      | 13      |
| Israel*               | 1          | 0      | 0       | 0      | 0          | –       | 0       | 0      | 0          | –       |
| Italy*                | 0          | 0      | 12.0    | 3.5    | 6.364      | 5       | 0       | 0      | 0          | –       |
| Japan*                | 3          | 5      | 55.0    | 7.8    | 14.182     | 2       | 26.0    | 7.1    | 19.305     | 2       |
| Korea, S.*            | 1          | 4      | 5.0     | 2.0    | 3.636      | 9       | 5.0     | 1.0    | 2.703      | 8       |
| Netherlands*          | 0          | 0      | 0       | 0      | 0          | –       | 1.0     | 1.0    | 2.703      | 8       |
| New Zealand*          | 0          | 0      | 7.0     | 1.0    | 1.818      | 10      | 0       | 0      | 0          | –       |
| Portugal*             | 1          | 3      | 0       | 0      | 0          | –       | 0       | 0      | 0          | –       |
| Spain*                | 1          | 3      | 0       | 0      | 0          | –       | 0       | 0      | 0          | –       |
| Sweden*               | 1          | 0      | 2.0     | 0.4    | 0.727      | 14      | 1.7     | 0.2    | 0.644      | 14      |
| Taiwan*               | 0          | 0      | 9.0     | 1.0    | 1.818      | 10      | 3.0     | 1.0    | 2.703      | 8       |
| United Kingdom*       | 5          | 4      | 14.5    | 4.0    | 7.273      | 3       | 13.0    | 3.0    | 8.108      | 4       |
| USA*                  | 7          | 6      | 134.0   | 19.6   | 35.636     | 1       | 74.0    | 11.6   | 31.231     | 1       |

### 6.7. Journal of Applied Crystallography

| Country                 | Co-editors |        | 2022    |        |            |         | 2023    |        |            |         |
|-------------------------|------------|--------|---------|--------|------------|---------|---------|--------|------------|---------|
|                         | No.        | Papers | Authors | Papers | % of total | Ranking | Authors | Papers | % of total | Ranking |
| Algeria*                | 0          | 0      | 0       | 0      | 0          | –       | 1.0     | 0.5    | 0.267      | 26      |
| Argentina*              | 0          | 0      | 3.5     | 0.7    | 0.417      | 25      | 4.7     | 1.1    | 0.594      | 25      |
| Australia*              | 5          | 42     | 28.0    | 5.4    | 3.216      | 10      | 31.5    | 4.4    | 2.348      | 13      |
| Austria*                | 1          | 19     | 12.0    | 2.4    | 1.429      | 13      | 15.5    | 1.8    | 0.944      | 20      |
| Belgium*                | 0          | 0      | 1.0     | 0.5    | 0.298      | 29      | 0       | 0      | 0          | –       |
| Brazil*                 | 1          | 7      | 3.0     | 0.8    | 0.476      | 23      | 31.0    | 5.3    | 2.846      | 8       |
| Canada*                 | 1          | 3      | 0.5     | 0.2    | 0.119      | 34      | 8.5     | 1.7    | 0.896      | 21      |
| China, People's Rep.*   | 1          | 12     | 72.0    | 14.2   | 8.457      | 4       | 106.5   | 17.7   | 9.471      | 4       |
| Czechia*                | 0          | 0      | 3.3     | 0.6    | 0.357      | 27      | 13.0    | 2.8    | 1.471      | 15      |
| Denmark*                | 0          | 0      | 25.8    | 4.8    | 2.859      | 11      | 33.5    | 5.2    | 2.776      | 9       |
| Finland*                | 0          | 0      | 0       | 0      | 0          | –       | 1.0     | 0.0    | 0.011      | 35      |
| France*                 | 1          | 18     | 114.5   | 18.5   | 11.018     | 3       | 105.5   | 23.0   | 12.312     | 3       |
| Germany*                | 3          | 8      | 190.5   | 27.6   | 16.438     | 2       | 174.0   | 27.3   | 14.586     | 2       |
| Hungary*                | 0          | 0      | 0       | 0      | 0          | –       | 2.0     | 0.2    | 0.089      | 33      |
| India*                  | 1          | 0      | 4.0     | 1.0    | 0.596      | 14      | 7.0     | 2.0    | 1.081      | 16      |
| Ireland*                | 0          | 0      | 1.5     | 0.5    | 0.298      | 29      | 1.5     | 0.3    | 0.160      | 31      |
| Israel*                 | 0          | 0      | 3.0     | 0.8    | 0.476      | 23      | 7.0     | 1.1    | 0.598      | 24      |
| Italy*                  | 0          | 0      | 36.0    | 8.9    | 5.301      | 8       | 52.0    | 10.5   | 5.620      | 6       |
| Japan*                  | 1          | 10     | 61.0    | 14.1   | 8.398      | 5       | 86.5    | 11.9   | 6.346      | 5       |
| Jordan                  | 0          | 0      | 0       | 0      | 0          | –       | 0       | 0      | 0          | –       |
| Korea, S.*              | 0          | 0      | 9.0     | 1.0    | 0.596      | 14      | 6.0     | 1.8    | 0.980      | 19      |
| Latvia                  | 0          | 0      | 0       | 0      | 0          | –       | 0.5     | 0.5    | 0.267      | 26      |
| Lithuania               | 0          | 0      | 5.0     | 1.0    | 0.596      | 14      | 0       | 0      | 0          | –       |
| Luxembourg              | 1          | 2      | 3.0     | 0.5    | 0.298      | 29      | 0       | 0      | 0          | –       |
| Malaysia*               | 0          | 0      | 3.0     | 1.0    | 0.596      | 14      | 0       | 0      | 0          | –       |
| Mexico*                 | 0          | 0      | 5.0     | 1.0    | 0.596      | 14      | 0       | 0      | 0          | –       |
| Netherlands*            | 0          | 0      | 3.0     | 1.0    | 0.596      | 14      | 4.0     | 0.3    | 0.141      | 32      |
| New Zealand*            | 0          | 0      | 0       | 0      | 0          | –       | 1.0     | 0.3    | 0.178      | 30      |
| Norway*                 | 0          | 0      | 0       | 0      | 0          | –       | 4.0     | 0.4    | 0.238      | 29      |
| Pakistan*               | 0          | 0      | 2.0     | 0.3    | 0.179      | 33      | 0       | 0      | 0          | –       |
| Palestinian Territories | 0          | 0      | 1.5     | 0.2    | 0.119      | 34      | 0       | 0      | 0          | –       |
| Poland*                 | 0          | 0      | 2.0     | 0.7    | 0.417      | 25      | 16.0    | 4.6    | 2.451      | 11      |
| Russia*                 | 0          | 0      | 46.5    | 9.9    | 5.896      | 6       | 52.0    | 8.3    | 4.417      | 7       |
| Singapore*              | 0          | 0      | 0       | 0      | 0          | –       | 3.5     | 1.3    | 0.714      | 23      |
| Spain*                  | 1          | 6      | 5.5     | 0.9    | 0.536      | 22      | 11.0    | 1.8    | 0.987      | 18      |
| Sweden*                 | 2          | 14     | 26.5    | 6.1    | 3.633      | 9       | 39.5    | 4.6    | 2.445      | 12      |
| Switzerland*            | 0          | 0      | 19.3    | 3.4    | 2.025      | 12      | 24.8    | 2.8    | 1.490      | 14      |
| Türkiye                 | 0          | 0      | 1.0     | 0.5    | 0.298      | 29      | 0       | 0      | 0          | –       |
| Taiwan*                 | 0          | 0      | 24.0    | 1.0    | 0.596      | 14      | 14.5    | 1.5    | 0.780      | 22      |
| Thailand*               | 0          | 0      | 0       | 0      | 0          | –       | 4.0     | 2.0    | 1.070      | 17      |
| Trinidad and Tobago     | 0          | 0      | 3.0     | 1.0    | 0.596      | 14      | 0       | 0      | 0          | –       |
| Ukraine                 | 0          | 0      | 2.5     | 0.6    | 0.357      | 27      | 1.5     | 0.5    | 0.245      | 28      |
| United Kingdom*         | 1          | 0      | 42.5    | 9.1    | 5.420      | 7       | 39.5    | 5.0    | 2.652      | 10      |
| Uruguay*                | 0          | 0      | 0       | 0      | 0          | –       | 1.0     | 0.2    | 0.089      | 33      |
| USA*                    | 5          | 46     | 189.7   | 27.7   | 16.498     | 1       | 181.5   | 34.5   | 18.438     | 1       |

### 6.8. Journal of Synchrotron Radiation

| Country    | Co-editors |        | 2022    |        |            |         | 2023    |        |            |         |
|------------|------------|--------|---------|--------|------------|---------|---------|--------|------------|---------|
|            | No.        | Papers | Authors | Papers | % of total | Ranking | Authors | Papers | % of total | Ranking |
| Argentina* | 1          | 7      | 0       | 0      | 0          | –       | 0       | 0      | 0          | –       |
| Australia* | 0          | 0      | 62.8    | 4.5    | 2.711      | 9       | 52.3    | 5.8    | 4.637      | 7       |
| Austria*   | 0          | 0      | 4.0     | 0.7    | 0.422      | 24      | 4.0     | 0.3    | 0.210      | 23      |
| Belgium*   | 0          | 0      | 1.0     | 0.3    | 0.181      | 28      | 0       | 0      | 0          | –       |

## 6.8. Journal of Synchrotron Radiation

| Country               | Co-editors |        | 2022    |        |            |         | 2023    |        |            |         |
|-----------------------|------------|--------|---------|--------|------------|---------|---------|--------|------------|---------|
|                       | No.        | Papers | Authors | Papers | % of total | Ranking | Authors | Papers | % of total | Ranking |
| Brazil*               | 0          | 0      | 0       | 0      | 0          | –       | 5.5     | 0.7    | 0.546      | 20      |
| Canada*               | 0          | 0      | 12.5    | 2.2    | 1.325      | 13      | 17.5    | 3.1    | 2.434      | 10      |
| China, People's Rep.* | 0          | 0      | 123.0   | 17.1   | 10.301     | 4       | 146.0   | 16.9   | 13.406     | 4       |
| Czechia*              | 0          | 0      | 2.0     | 0.5    | 0.301      | 27      | 5.0     | 0.2    | 0.198      | 24      |
| Denmark*              | 0          | 0      | 4.5     | 0.8    | 0.482      | 23      | 8.5     | 0.9    | 0.675      | 18      |
| Egypt*                | 0          | 0      | 6.0     | 1.2    | 0.723      | 18      | 0       | 0      | 0          | –       |
| Finland*              | 0          | 0      | 3.5     | 1.0    | 0.602      | 20      | 9.0     | 2.2    | 1.786      | 12      |
| France*               | 3          | 8      | 222.2   | 22.6   | 13.614     | 2       | 156.0   | 17.4   | 13.846     | 3       |
| Germany*              | 3          | 17     | 339.7   | 21.0   | 12.651     | 3       | 319.9   | 19.8   | 15.712     | 2       |
| Hungary*              | 0          | 0      | 6.0     | 1.2    | 0.723      | 18      | 0       | 0      | 0          | –       |
| India*                | 1          | 7      | 8.0     | 1.8    | 1.084      | 16      | 11.0    | 1.3    | 0.992      | 15      |
| Israel*               | 0          | 0      | 2.5     | 0.3    | 0.181      | 28      | 2.0     | 0.3    | 0.227      | 22      |
| Italy*                | 2          | 0      | 33.8    | 3.5    | 2.108      | 11      | 22.5    | 1.2    | 0.916      | 17      |
| Japan*                | 5          | 37     | 120.0   | 13.3   | 8.012      | 5       | 90.0    | 12.5   | 9.890      | 5       |
| Jordan                | 1          | 0      | 17.0    | 2.0    | 1.205      | 15      | 0       | 0      | 0          | –       |
| Korea, S.*            | 0          | 0      | 30.0    | 3.6    | 2.169      | 10      | 27.5    | 2.6    | 2.049      | 11      |
| Luxembourg            | 0          | 0      | 2.0     | 0.2    | 0.120      | 31      | 0       | 0      | 0          | –       |
| Mexico*               | 0          | 0      | 4.0     | 0.3    | 0.181      | 28      | 0       | 0      | 0          | –       |
| Netherlands*          | 1          | 0      | 7.0     | 1.6    | 0.964      | 17      | 2.5     | 0.3    | 0.248      | 21      |
| Poland*               | 0          | 0      | 1.0     | 0.2    | 0.120      | 31      | 0.5     | 0.0    | 0.015      | 25      |
| Russia*               | 0          | 0      | 37.3    | 6.2    | 3.735      | 7       | 11.5    | 1.8    | 1.422      | 14      |
| Singapore*            | 0          | 0      | 5.0     | 0.7    | 0.422      | 24      | 0       | 0      | 0          | –       |
| Slovak Rep.*          | 0          | 0      | 1.0     | 0.1    | 0.060      | 33      | 0       | 0      | 0          | –       |
| Spain*                | 1          | 9      | 16.0    | 1.0    | 0.602      | 20      | 10.5    | 1.2    | 0.960      | 16      |
| Sweden*               | 1          | 11     | 63.5    | 5.4    | 3.253      | 8       | 40.6    | 4.2    | 3.305      | 8       |
| Switzerland*          | 3          | 11     | 18.0    | 2.9    | 1.747      | 12      | 63.5    | 5.9    | 4.714      | 6       |
| Taiwan*               | 1          | 4      | 17.0    | 2.1    | 1.265      | 14      | 13.0    | 2.0    | 1.587      | 13      |
| Thailand*             | 0          | 0      | 8.0     | 1.0    | 0.602      | 20      | 5.0     | 0.8    | 0.661      | 19      |
| United Kingdom*       | 3          | 9      | 87.8    | 10.4   | 6.265      | 6       | 36.2    | 3.9    | 3.119      | 9       |
| USA*                  | 2          | 6      | 344.8   | 35.7   | 21.506     | 1       | 172.0   | 20.7   | 16.444     | 1       |

## 6.9. IUCrJ

| Country               | Co-editors |        | 2022    |        |            |         | 2023    |        |            |         |
|-----------------------|------------|--------|---------|--------|------------|---------|---------|--------|------------|---------|
|                       | No.        | Papers | Authors | Papers | % of total | Ranking | Authors | Papers | % of total | Ranking |
| Australia*            | 1          | 2      | 22.5    | 1.6    | 2.260      | 12      | 10.0    | 1.7    | 2.674      | 12      |
| Austria*              | 0          | 0      | 3.0     | 0.5    | 0.706      | 24      | 0       | 0      | 0          | –       |
| Belgium*              | 0          | 0      | 3.0     | 0.8    | 1.130      | 21      | 0       | 0      | 0          | –       |
| Brazil*               | 0          | 0      | 10.0    | 0.9    | 1.271      | 20      | 0       | 0      | 0          | –       |
| Canada*               | 1          | 0      | 1.0     | 0.2    | 0.282      | 28      | 0       | 0      | 0          | –       |
| China, People's Rep.* | 5          | 12     | 48.0    | 6.6    | 9.322      | 3       | 51.0    | 8.3    | 12.846     | 2       |
| Croatia*              | 0          | 0      | 9.0     | 1.0    | 1.412      | 16      | 2.0     | 0.3    | 0.513      | 21      |
| Czechia*              | 0          | 0      | 12.0    | 2.3    | 3.249      | 8       | 9.0     | 1.0    | 1.538      | 15      |
| Denmark*              | 0          | 0      | 15.0    | 2.2    | 3.107      | 9       | 18.5    | 2.9    | 4.524      | 6       |
| Finland*              | 0          | 0      | 1.0     | 0.2    | 0.282      | 28      | 3.7     | 0.4    | 0.627      | 20      |
| France*               | 2          | 3      | 23.0    | 3.5    | 4.944      | 6       | 11.5    | 1.9    | 2.912      | 10      |
| Germany*              | 3          | 2      | 122.1   | 11.0   | 15.537     | 1       | 47.7    | 6.2    | 9.560      | 5       |
| India*                | 1          | 0      | 10.0    | 1.2    | 1.695      | 15      | 11.0    | 0.9    | 1.410      | 18      |
| Ireland*              | 0          | 0      | 0       | 0      | 0          | –       | 5.0     | 1.0    | 1.538      | 15      |
| Israel*               | 1          | 1      | 0       | 0      | 0          | –       | 0       | 0      | 0          | –       |
| Italy*                | 1          | 0      | 7.5     | 1.4    | 1.977      | 13      | 21.5    | 2.5    | 3.911      | 8       |
| Ivory Coast           | 0          | 0      | 0       | 0      | 0          | –       | 1.0     | 0.5    | 0.769      | 19      |
| Japan*                | 2          | 6      | 29.5    | 3.1    | 4.379      | 7       | 16.5    | 1.9    | 2.987      | 9       |
| Korea, S.*            | 0          | 0      | 10.0    | 2.1    | 2.966      | 10      | 70.0    | 7.6    | 11.731     | 4       |
| Luxembourg            | 0          | 0      | 4.0     | 0.7    | 0.989      | 23      | 6.0     | 1.3    | 2.000      | 13      |
| Netherlands*          | 0          | 0      | 2.3     | 0.3    | 0.424      | 27      | 0       | 0      | 0          | –       |
| New Zealand*          | 1          | 1      | 2.0     | 1.0    | 1.412      | 16      | 0       | 0      | 0          | –       |
| Peru                  | 0          | 0      | 1.0     | 0.1    | 0.141      | 30      | 0       | 0      | 0          | –       |
| Poland*               | 0          | 0      | 28.0    | 6.1    | 8.616      | 4       | 2.0     | 1.0    | 1.538      | 15      |
| Russia*               | 0          | 0      | 13.0    | 2.1    | 2.966      | 10      | 5.5     | 1.3    | 2.000      | 13      |
| Saudi Arabia          | 1          | 2      | 0       | 0      | 0          | –       | 0       | 0      | 0          | –       |
| Serbia*               | 0          | 0      | 5.0     | 0.8    | 1.130      | 21      | 0       | 0      | 0          | –       |
| Singapore*            | 0          | 0      | 3.0     | 0.1    | 0.141      | 30      | 2.0     | 0.2    | 0.385      | 22      |
| Slovak Rep.*          | 0          | 0      | 0       | 0      | 0          | –       | 1.0     | 0.2    | 0.256      | 23      |
| South Africa*         | 1          | 0      | 1.5     | 0.5    | 0.706      | 24      | 0       | 0      | 0          | –       |
| Spain*                | 0          | 0      | 3.0     | 1.0    | 1.412      | 16      | 0       | 0      | 0          | –       |
| Sweden*               | 3          | 3      | 6.0     | 1.3    | 1.836      | 14      | 33.3    | 1.8    | 2.800      | 11      |
| Switzerland*          | 0          | 0      | 2.5     | 0.4    | 0.565      | 26      | 23.0    | 2.7    | 4.110      | 7       |
| Türkiye               | 0          | 0      | 0       | 0      | 0          | –       | 0       | 0      | 0          | –       |
| Taiwan*               | 0          | 0      | 7.0     | 1.0    | 1.412      | 16      | 0       | 0      | 0          | –       |
| Ukraine               | 0          | 0      | 0       | 0      | 0          | –       | 1.5     | 0.2    | 0.231      | 24      |
| United Kingdom*       | 8          | 13     | 44.8    | 5.8    | 8.192      | 5       | 49.8    | 8.0    | 12.231     | 3       |
| USA*                  | 8          | 20     | 82.8    | 11.0   | 15.537     | 1       | 86.5    | 11.0   | 16.907     | 1       |

## 6.10. IUCrData

| Country     | Co-editors |        | 2022    |        |            |         | 2023    |        |            |         |
|-------------|------------|--------|---------|--------|------------|---------|---------|--------|------------|---------|
|             | No.        | Papers | Authors | Papers | % of total | Ranking | Authors | Papers | % of total | Ranking |
| Algeria*    | 0          | 0      | 19.0    | 4.4    | 4.726      | 7       | 4.0     | 0.7    | 0.542      | 20      |
| Austria*    | 1          | 21     | 0       | 0      | 0          | –       | 3.0     | 1.0    | 0.813      | 15      |
| Bangladesh* | 0          | 0      | 2.0     | 0.4    | 0.430      | 21      | 2.0     | 0.4    | 0.325      | 24      |
| Belgium*    | 1          | 7      | 0       | 0      | 0          | –       | 0       | 0      | 0          | –       |
| Brazil*     | 0          | 0      | 0       | 0      | 0          | –       | 10.0    | 2.1    | 1.707      | 11      |
| Bulgaria*   | 0          | 0      | 0       | 0      | 0          | –       | 1.0     | 0.5    | 0.407      | 22      |
| Canada*     | 0          | 0      | 5.0     | 1.0    | 1.074      | 15      | 3.0     | 1.0    | 0.813      | 15      |
| Chile*      | 1          | 2      | 2.0     | 1.0    | 1.074      | 15      | 0       | 0      | 0          | –       |

## 6.10. IUCrData

| Country                 | Co-editors |        | 2022    |        |            |         | 2023    |        |            |         |
|-------------------------|------------|--------|---------|--------|------------|---------|---------|--------|------------|---------|
|                         | No.        | Papers | Authors | Papers | % of total | Ranking | Authors | Papers | % of total | Ranking |
| China, People's Rep.*   | 1          | 4      | 33.0    | 11.0   | 11.815     | 2       | 32.0    | 12.0   | 9.756      | 3       |
| Costa Rica*             | 0          | 0      | 7.0     | 1.8    | 1.933      | 13      | 0       | 0      | 0          | –       |
| Egypt*                  | 0          | 0      | 7.0     | 2.1    | 2.256      | 11      | 3.5     | 0.8    | 0.610      | 19      |
| France*                 | 0          | 0      | 2.0     | 0.3    | 0.322      | 22      | 1.0     | 0.2    | 0.136      | 27      |
| Germany*                | 2          | 18     | 17.0    | 5.7    | 6.122      | 4       | 47.0    | 17.4   | 14.146     | 2       |
| Greece*                 | 0          | 0      | 4.0     | 1.3    | 1.396      | 14      | 0       | 0      | 0          | –       |
| India*                  | 0          | 0      | 35.0    | 7.3    | 7.841      | 3       | 23.0    | 4.3    | 3.523      | 9       |
| Indonesia*              | 0          | 0      | 0       | 0      | 0          | –       | 0.5     | 0.1    | 0.058      | 32      |
| Iraq                    | 0          | 0      | 0       | 0      | 0          | –       | 1.0     | 0.2    | 0.136      | 27      |
| Italy*                  | 0          | 0      | 1.0     | 0.2    | 0.215      | 24      | 1.0     | 0.2    | 0.163      | 26      |
| Japan*                  | 0          | 0      | 17.0    | 5.4    | 5.800      | 5       | 19.0    | 4.4    | 3.577      | 8       |
| Korea, S.*              | 0          | 0      | 2.0     | 2.0    | 2.148      | 12      | 2.0     | 2.0    | 1.626      | 13      |
| Kuwait                  | 0          | 0      | 0       | 0      | 0          | –       | 2.0     | 1.0    | 0.813      | 15      |
| Malaysia*               | 0          | 0      | 0       | 0      | 0          | –       | 18.5    | 3.0    | 2.468      | 10      |
| Mexico*                 | 1          | 11     | 19.0    | 4.2    | 4.511      | 8       | 18.0    | 5.0    | 4.065      | 6       |
| Morocco                 | 0          | 0      | 15.0    | 2.6    | 2.793      | 10      | 31.0    | 5.2    | 4.235      | 5       |
| Nepal                   | 0          | 0      | 1.0     | 0.2    | 0.215      | 24      | 0       | 0      | 0          | –       |
| Netherlands*            | 1          | 1      | 11.0    | 3.0    | 3.222      | 9       | 0.5     | 0.2    | 0.136      | 27      |
| New Zealand*            | 0          | 0      | 0       | 0      | 0          | –       | 1.0     | 0.3    | 0.271      | 25      |
| Nigeria                 | 0          | 0      | 0       | 0      | 0          | –       | 2.5     | 0.6    | 0.508      | 21      |
| Palestinian Territories | 0          | 0      | 0       | 0      | 0          | –       | 1.0     | 0.2    | 0.136      | 27      |
| Russia*                 | 1          | 0      | 0       | 0      | 0          | –       | 0       | 0      | 0          | –       |
| Saudi Arabia            | 0          | 0      | 0       | 0      | 0          | –       | 1.0     | 0.2    | 0.136      | 27      |
| Slovenia*               | 0          | 0      | 0       | 0      | 0          | –       | 24.0    | 7.5    | 6.098      | 4       |
| South Africa*           | 0          | 0      | 17.0    | 5.0    | 5.371      | 6       | 13.5    | 4.5    | 3.659      | 7       |
| Spain*                  | 2          | 9      | 2.0     | 0.7    | 0.752      | 20      | 2.0     | 0.5    | 0.407      | 22      |
| Switzerland*            | 0          | 0      | 2.0     | 1.0    | 1.074      | 15      | 0       | 0      | 0          | –       |
| United Kingdom*         | 4          | 35     | 1.0     | 0.3    | 0.322      | 22      | 9.0     | 2.1    | 1.674      | 12      |
| USA*                    | 4          | 15     | 104.0   | 30.3   | 32.546     | 1       | 133.0   | 43.2   | 35.111     | 1       |
| Uzbekistan              | 0          | 0      | 4.0     | 1.0    | 1.074      | 15      | 7.0     | 1.0    | 0.813      | 15      |
| Yemen                   | 0          | 0      | 5.0     | 0.9    | 0.967      | 19      | 8.0     | 1.4    | 1.134      | 14      |



## 7. Manuscripts rejected and withdrawn in 2023

### 7.1. *Acta Crystallographica*

|  | Number accepted | Number rejected | Number withdrawn | Rejection rate (%) | Withdrawal rate (%) | Rejection and withdrawal rate (%) |
|--|-----------------|-----------------|------------------|--------------------|---------------------|-----------------------------------|
|--|-----------------|-----------------|------------------|--------------------|---------------------|-----------------------------------|

#### *Section A*

|      |     |        |    |    |    |    |
|------|-----|--------|----|----|----|----|
| 2023 | 57  | 13*+18 | 10 | 32 | 10 | 42 |
| 2022 | 51  | 4*+11  | 8  | 25 | 13 | 38 |
| 2021 | 53  | 7*+13  | 7  | 25 | 9  | 34 |
| 2020 | 68  | 11*+15 | 10 | 25 | 10 | 35 |
| 2019 | 75  | 9*+26  | 11 | 29 | 19 | 38 |
| 2018 | 85  | 5*+26  | 4  | 26 | 3  | 29 |
| 2017 | 50  | 4*+18  | 12 | 26 | 14 | 40 |
| 2016 | 61  | 24     | 14 | 24 | 14 | 38 |
| 2015 | 63  | 5*+15  | 3  | 23 | 3  | 27 |
| 2014 | 69  | 3*+17  | 12 | 20 | 12 | 32 |
| 2013 | 62  | 28     | 11 | 28 | 11 | 39 |
| 2012 | 73  | 26     | 10 | 24 | 9  | 33 |
| 2011 | 75  | 34     | 17 | 27 | 13 | 40 |
| 2010 | 59  | 21     | 19 | 21 | 19 | 40 |
| 2009 | 66  | 26     | 16 | 24 | 15 | 39 |
| 2008 | 57  | 15     | 13 | 18 | 15 | 33 |
| 2007 | 74  | 19     | 17 | 17 | 15 | 33 |
| 2006 | 62  | 18     | 10 | 20 | 11 | 31 |
| 2005 | 54  | 17     | 17 | 19 | 19 | 39 |
| 2004 | 95  | 23     | 21 | 17 | 15 | 32 |
| 2003 | 75  | 26     | 26 | 20 | 20 | 41 |
| 2002 | 84  | 23     | 10 | 20 | 9  | 28 |
| 2001 | 85  | 14     | 10 | 13 | 9  | 22 |
| 2000 | 92  | 18     | 8  | 15 | 7  | 22 |
| 1999 | 71  | 11     | 9  | 12 | 10 | 22 |
| 1998 | 142 | 24     | 15 | 13 | 8  | 22 |
| 1997 | 118 | 13     | 2  | 10 | 2  | 11 |

#### *Section B*

|      |     |    |    |    |    |    |
|------|-----|----|----|----|----|----|
| 2023 | 49  | 28 | 8  | 33 | 9  | 42 |
| 2022 | 89  | 32 | 7  | 25 | 5  | 30 |
| 2021 | 102 | 34 | 5  | 24 | 4  | 28 |
| 2020 | 116 | 40 | 13 | 24 | 8  | 31 |
| 2019 | 135 | 50 | 15 | 25 | 8  | 32 |
| 2018 | 78  | 50 | 8  | 37 | 6  | 43 |
| 2017 | 117 | 50 | 11 | 28 | 6  | 34 |
| 2016 | 97  | 33 | 10 | 24 | 7  | 31 |
| 2015 | 100 | 38 | 8  | 26 | 5  | 32 |
| 2014 | 88  | 26 | 8  | 21 | 7  | 28 |
| 2013 | 99  | 34 | 22 | 22 | 14 | 36 |
| 2012 | 70  | 25 | 11 | 24 | 10 | 34 |
| 2011 | 61  | 22 | 19 | 22 | 19 | 40 |
| 2010 | 66  | 31 | 13 | 28 | 12 | 40 |
| 2009 | 91  | 33 | 13 | 24 | 9  | 34 |
| 2008 | 89  | 37 | 11 | 27 | 8  | 35 |
| 2007 | 91  | 50 | 13 | 32 | 8  | 41 |
| 2006 | 132 | 44 | 23 | 22 | 12 | 34 |
| 2005 | 96  | 41 | 13 | 27 | 9  | 36 |
| 2004 | 91  | 27 | 26 | 19 | 18 | 37 |
| 2003 | 82  | 22 | 21 | 18 | 17 | 34 |
| 2002 | 118 | 20 | 8  | 14 | 5  | 19 |

### 7.1. Acta Crystallographica

|      | Number accepted | Number rejected | Number withdrawn | Rejection rate (%) | Withdrawal rate (%) | Rejection and withdrawal rate (%) |
|------|-----------------|-----------------|------------------|--------------------|---------------------|-----------------------------------|
| 2001 | 106             | 12              | 6                | 10                 | 5                   | 15                                |
| 2000 | 122             | 24              | 9                | 15                 | 6                   | 21                                |
| 1999 | 119             | 11              | 8                | 8                  | 6                   | 14                                |
| 1998 | 109             | 9               | 13               | 7                  | 10                  | 17                                |
| 1997 | 123             | 14              | 15               | 9                  | 10                  | 19                                |

### Section C

|      |      |     |     |    |    |    |
|------|------|-----|-----|----|----|----|
| 2023 | 58   | 50  | 11  | 42 | 9  | 51 |
| 2022 | 92   | 48  | 21  | 30 | 13 | 43 |
| 2021 | 101  | 49  | 18  | 29 | 11 | 40 |
| 2020 | 132  | 72  | 21  | 32 | 9  | 41 |
| 2019 | 205  | 156 | 43  | 39 | 11 | 49 |
| 2018 | 232  | 131 | 44  | 32 | 11 | 43 |
| 2017 | 181  | 106 | 54  | 31 | 16 | 47 |
| 2016 | 166  | 100 | 50  | 32 | 16 | 47 |
| 2015 | 193  | 147 | 59  | 37 | 15 | 52 |
| 2014 | 230  | 164 | 63  | 36 | 14 | 50 |
| 2013 | 350  | 196 | 52  | 33 | 9  | 41 |
| 2012 | 232  | 151 | 72  | 33 | 16 | 49 |
| 2011 | 235  | 167 | 72  | 35 | 15 | 50 |
| 2010 | 283  | 243 | 75  | 40 | 12 | 53 |
| 2009 | 332  | 270 | 87  | 39 | 13 | 52 |
| 2008 | 307  | 341 | 118 | 45 | 15 | 60 |
| 2007 | 451  | 317 | 173 | 34 | 18 | 52 |
| 2006 | 466  | 286 | 189 | 30 | 20 | 50 |
| 2005 | 404  | 299 | 265 | 31 | 27 | 58 |
| 2004 | 561  | 239 | 291 | 22 | 27 | 49 |
| 2003 | 512  | 121 | 191 | 15 | 23 | 38 |
| 2002 | 471  | 101 | 176 | 14 | 24 | 37 |
| 2001 | 511  | 74  | 220 | 9  | 27 | 37 |
| 2000 | 915  | 78  | 298 | 6  | 23 | 29 |
| 1999 | 766  | 76  | 224 | 7  | 21 | 28 |
| 1998 | 944  | 112 | 208 | 9  | 16 | 25 |
| 1997 | 1024 | 145 | 240 | 10 | 17 | 27 |

### Section D

|      |     |     |    |    |    |    |
|------|-----|-----|----|----|----|----|
| 2023 | 92  | 15  | 11 | 13 | 9  | 22 |
| 2022 | 112 | 24  | 12 | 16 | 8  | 24 |
| 2021 | 140 | 23  | 12 | 13 | 7  | 20 |
| 2020 | 135 | 12  | 11 | 8  | 7  | 15 |
| 2019 | 95  | 30  | 8  | 23 | 6  | 29 |
| 2018 | 123 | 18  | 10 | 12 | 7  | 19 |
| 2017 | 99  | 20  | 11 | 15 | 8  | 24 |
| 2016 | 113 | 24  | 12 | 16 | 8  | 24 |
| 2015 | 212 | 48  | 31 | 16 | 11 | 27 |
| 2014 | 281 | 102 | 32 | 25 | 8  | 32 |
| 2013 | 307 | 78  | 33 | 19 | 8  | 27 |
| 2012 | 212 | 59  | 28 | 20 | 9  | 29 |
| 2011 | 139 | 29  | 19 | 16 | 10 | 26 |
| 2010 | 145 | 22  | 20 | 12 | 11 | 22 |
| 2009 | 172 | 28  | 13 | 13 | 6  | 19 |
| 2008 | 137 | 23  | 10 | 14 | 6  | 19 |
| 2007 | 148 | 30  | 13 | 16 | 7  | 23 |
| 2006 | 201 | 27  | 35 | 10 | 13 | 24 |
| 2005 | 211 | 28  | 37 | 10 | 13 | 24 |
| 2004 | 446 | 37  | 33 | 7  | 6  | 14 |
| 2003 | 486 | 23  | 24 | 4  | 5  | 9  |
| 2002 | 467 | 19  | 10 | 4  | 2  | 6  |

### 7.1. Acta Crystallographica

|      | Number accepted | Number rejected | Number withdrawn | Rejection rate (%) | Withdrawal rate (%) | Rejection and withdrawal rate (%) |
|------|-----------------|-----------------|------------------|--------------------|---------------------|-----------------------------------|
| 2001 | 396             | 9               | 11               | 2                  | 3                   | 5                                 |
| 2000 | 349             | 22              | 6                | 6                  | 2                   | 7                                 |
| 1999 | 304             | 9               | 11               | 3                  | 3                   | 6                                 |
| 1998 | 275             | 12              | 4                | 4                  | 1                   | 5                                 |
| 1997 | 213             | 8               | 6                | 4                  | 3                   | 6                                 |

### Section E

|      |      |     |     |    |   |    |
|------|------|-----|-----|----|---|----|
| 2023 | 251  | 23  | 13  | 8  | 5 | 13 |
| 2022 | 239  | 14  | 15  | 5  | 6 | 11 |
| 2021 | 271  | 12  | 8   | 4  | 3 | 7  |
| 2020 | 353  | 45  | 23  | 11 | 5 | 16 |
| 2019 | 386  | 59  | 37  | 12 | 8 | 20 |
| 2018 | 420  | 51  | 32  | 10 | 6 | 17 |
| 2017 | 449  | 47  | 34  | 9  | 6 | 15 |
| 2016 | 447  | 49  | 42  | 9  | 8 | 17 |
| 2015 | 1095 | 83  | 108 | 6  | 8 | 15 |
| 2014 | 1318 | 90  | 109 | 6  | 7 | 13 |
| 2013 | 1858 | 161 | 159 | 7  | 7 | 15 |
| 2012 | 3882 | 445 | 340 | 10 | 7 | 17 |
| 2011 | 4449 | 675 | 336 | 12 | 6 | 19 |
| 2010 | 4147 | 536 | 404 | 11 | 8 | 18 |
| 2009 | 4206 | 543 | 384 | 11 | 7 | 18 |
| 2008 | 3245 | 391 | 247 | 10 | 6 | 16 |
| 2007 | 5423 | 644 | 430 | 10 | 7 | 17 |
| 2006 | 4183 | 566 | 325 | 11 | 6 | 18 |
| 2005 | 2996 | 342 | 256 | 10 | 7 | 17 |
| 2004 | 1899 | 253 | 203 | 11 | 9 | 19 |
| 2003 | 1370 | 81  | 117 | 5  | 7 | 13 |
| 2002 | 937  | 37  | 67  | 4  | 6 | 10 |
| 2001 | 794  | 24  | 53  | 3  | 6 | 9  |
| 2000 | 77   | 1   | 6   | 1  | 7 | 8  |

### Section F

|      |     |    |    |    |    |    |
|------|-----|----|----|----|----|----|
| 2023 | 36  | 14 | 3  | 26 | 6  | 32 |
| 2022 | 50  | 13 | 7  | 19 | 10 | 29 |
| 2021 | 65  | 17 | 6  | 19 | 7  | 26 |
| 2020 | 81  | 21 | 8  | 19 | 7  | 26 |
| 2019 | 86  | 29 | 11 | 23 | 9  | 32 |
| 2018 | 122 | 50 | 13 | 27 | 7  | 34 |
| 2017 | 109 | 66 | 10 | 36 | 5  | 41 |
| 2016 | 131 | 50 | 19 | 25 | 10 | 34 |
| 2015 | 228 | 80 | 36 | 23 | 10 | 34 |
| 2014 | 330 | 30 | 35 | 8  | 9  | 16 |
| 2013 | 334 | 14 | 14 | 4  | 4  | 8  |
| 2012 | 336 | 18 | 14 | 5  | 4  | 9  |
| 2011 | 355 | 14 | 17 | 4  | 4  | 8  |
| 2010 | 385 | 17 | 22 | 4  | 5  | 9  |
| 2009 | 366 | 16 | 22 | 4  | 5  | 9  |
| 2008 | 314 | 21 | 12 | 6  | 3  | 10 |
| 2007 | 279 | 19 | 12 | 6  | 4  | 10 |
| 2006 | 334 | 14 | 17 | 4  | 5  | 8  |
| 2005 | 287 | 13 | 17 | 4  | 5  | 9  |
| 2004 | 57  | 1  | 1  | 2  | 2  | 3  |

|  | Number accepted | Number rejected | Number withdrawn | Rejection rate (%) | Withdrawal rate (%) | Rejection and withdrawal rate (%) |
|--|-----------------|-----------------|------------------|--------------------|---------------------|-----------------------------------|
|--|-----------------|-----------------|------------------|--------------------|---------------------|-----------------------------------|

### 7.2 Journal of Applied Crystallography

|      |     |    |    |    |    |    |
|------|-----|----|----|----|----|----|
| 2023 | 177 | 83 | 19 | 30 | 7  | 37 |
| 2022 | 187 | 53 | 12 | 21 | 5  | 26 |
| 2021 | 175 | 60 | 27 | 23 | 10 | 33 |
| 2020 | 188 | 72 | 19 | 26 | 7  | 33 |
| 2019 | 182 | 64 | 23 | 24 | 9  | 32 |
| 2018 | 206 | 70 | 30 | 23 | 10 | 33 |
| 2017 | 192 | 91 | 24 | 30 | 8  | 37 |
| 2016 | 260 | 81 | 32 | 22 | 9  | 30 |
| 2015 | 246 | 69 | 31 | 20 | 9  | 29 |
| 2014 | 230 | 81 | 59 | 22 | 16 | 38 |
| 2013 | 266 | 93 | 54 | 23 | 13 | 36 |
| 2012 | 209 | 56 | 35 | 19 | 12 | 30 |
| 2011 | 162 | 57 | 27 | 23 | 11 | 34 |
| 2010 | 212 | 64 | 38 | 20 | 12 | 32 |
| 2009 | 182 | 67 | 28 | 24 | 10 | 34 |
| 2008 | 148 | 56 | 38 | 23 | 16 | 39 |
| 2007 | 265 | 58 | 23 | 17 | 7  | 23 |
| 2006 | 191 | 56 | 29 | 20 | 11 | 31 |
| 2005 | 146 | 33 | 23 | 16 | 11 | 28 |
| 2004 | 167 | 26 | 33 | 12 | 15 | 26 |
| 2003 | 277 | 25 | 28 | 8  | 8  | 16 |
| 2002 | 138 | 26 | 18 | 14 | 10 | 24 |
| 2001 | 138 | 17 | 33 | 9  | 18 | 27 |
| 2000 | 178 | 13 | 18 | 6  | 9  | 15 |
| 1999 | 220 | 23 | 17 | 9  | 7  | 15 |
| 1998 | 158 | 18 | 19 | 9  | 10 | 19 |
| 1997 | 235 | 16 | 14 | 6  | 5  | 11 |

### 7.3 Journal of Synchrotron Radiation

|      |     |    |    |    |    |    |
|------|-----|----|----|----|----|----|
| 2023 | 115 | 47 | 5  | 28 | 3  | 31 |
| 2022 | 154 | 25 | 6  | 14 | 3  | 17 |
| 2021 | 198 | 54 | 10 | 21 | 4  | 24 |
| 2020 | 212 | 49 | 18 | 18 | 6  | 24 |
| 2019 | 249 | 56 | 25 | 17 | 8  | 25 |
| 2018 | 211 | 36 | 18 | 14 | 7  | 20 |
| 2017 | 164 | 41 | 15 | 19 | 7  | 25 |
| 2016 | 174 | 52 | 15 | 22 | 6  | 28 |
| 2015 | 217 | 41 | 9  | 15 | 3  | 19 |
| 2014 | 168 | 35 | 12 | 16 | 6  | 22 |
| 2013 | 166 | 43 | 14 | 19 | 6  | 26 |
| 2012 | 150 | 32 | 11 | 17 | 6  | 22 |
| 2011 | 122 | 34 | 13 | 20 | 8  | 28 |
| 2010 | 123 | 32 | 13 | 19 | 8  | 27 |
| 2009 | 133 | 25 | 10 | 15 | 6  | 21 |
| 2008 | 95  | 28 | 14 | 20 | 10 | 31 |
| 2007 | 92  | 17 | 9  | 14 | 8  | 22 |
| 2006 | 69  | 12 | 9  | 13 | 10 | 23 |
| 2005 | 104 | 7  | 5  | 6  | 4  | 10 |
| 2004 | 86  | 10 | 13 | 9  | 12 | 21 |
| 2003 | 97  | 9  | 10 | 8  | 9  | 16 |
| 2002 | 99  | 3  | 3  | 3  | 3  | 6  |
| 2001 | 82  | 13 | 20 | 11 | 17 | 29 |
| 2000 | 327 | 37 | 13 | 10 | 3  | 13 |
| 1999 | 155 | 8  | 7  | 5  | 4  | 9  |
| 1998 | 215 | 26 | 21 | 10 | 8  | 18 |
| 1997 | 330 | 17 | 12 | 5  | 3  | 8  |

|  | Number accepted | Number rejected | Number withdrawn | Rejection rate (%) | Withdrawal rate (%) | Rejection and withdrawal rate (%) |
|--|-----------------|-----------------|------------------|--------------------|---------------------|-----------------------------------|
|--|-----------------|-----------------|------------------|--------------------|---------------------|-----------------------------------|

#### 7.4 IUCrJ

|      |     |        |   |    |   |    |
|------|-----|--------|---|----|---|----|
| 2023 | 68  | 20*+11 | 0 | 31 | 0 | 31 |
| 2022 | 60  | 14*+12 | 2 | 30 | 2 | 32 |
| 2021 | 94  | 34*+34 | 0 | 41 | 0 | 41 |
| 2020 | 105 | 46*+20 | 6 | 37 | 3 | 41 |
| 2019 | 111 | 34*+19 | 3 | 48 | 2 | 38 |
| 2018 | 96  | 31*+13 | 4 | 31 | 3 | 33 |
| 2017 | 89  | 20*+20 | 5 | 30 | 4 | 34 |
| 2016 | 52  | 15*+3  | 1 | 25 | 1 | 27 |
| 2015 | 67  | 11*+8  | 3 | 21 | 3 | 25 |
| 2014 | 78  | 21*+7  | 2 | 26 | 2 | 28 |
| 2013 | 10  | 0      | 0 | 0  | 0 | 0  |

#### 7.5 IUCrData

|      |     |    |    |    |   |    |
|------|-----|----|----|----|---|----|
| 2023 | 122 | 8  | 4  | 6  | 3 | 9  |
| 2022 | 96  | 4  | 5  | 4  | 5 | 9  |
| 2021 | 92  | 5  | 1  | 5  | 1 | 6  |
| 2020 | 139 | 11 | 9  | 7  | 6 | 13 |
| 2019 | 163 | 22 | 14 | 11 | 7 | 18 |
| 2018 | 238 | 24 | 24 | 8  | 8 | 17 |
| 2017 | 368 | 28 | 29 | 7  | 7 | 13 |
| 2016 | 512 | 35 | 32 | 6  | 6 | 12 |
| 2015 | 22  | 0  | 0  | 0  | 0 | 0  |

#### 7.6 Overall

|      |      |      |     |    |    |    |
|------|------|------|-----|----|----|----|
| 2023 | 903  | 322  | 80  | 25 | 6  | 31 |
| 2022 | 1034 | 232  | 90  | 17 | 7  | 24 |
| 2021 | 1291 | 282  | 94  | 17 | 6  | 23 |
| 2020 | 1529 | 357  | 138 | 18 | 7  | 24 |
| 2019 | 1687 | 511  | 190 | 21 | 8  | 29 |
| 2018 | 1811 | 469  | 187 | 19 | 8  | 27 |
| 2017 | 1818 | 487  | 205 | 19 | 8  | 28 |
| 2016 | 2013 | 451  | 227 | 17 | 8  | 25 |
| 2015 | 2443 | 529  | 288 | 16 | 9  | 25 |
| 2014 | 2792 | 552  | 332 | 15 | 9  | 24 |
| 2013 | 3452 | 647  | 359 | 15 | 8  | 23 |
| 2012 | 5164 | 812  | 521 | 12 | 8  | 21 |
| 2011 | 5598 | 1032 | 520 | 14 | 7  | 22 |
| 2010 | 5420 | 966  | 604 | 14 | 9  | 22 |
| 2009 | 5548 | 1008 | 573 | 14 | 8  | 22 |
| 2008 | 4392 | 912  | 463 | 16 | 8  | 24 |
| 2007 | 6823 | 1154 | 690 | 13 | 8  | 21 |
| 2006 | 5638 | 1023 | 637 | 14 | 9  | 23 |
| 2005 | 4298 | 780  | 633 | 14 | 11 | 25 |
| 2004 | 3402 | 616  | 621 | 13 | 13 | 27 |
| 2003 | 2899 | 307  | 417 | 8  | 12 | 20 |
| 2002 | 2314 | 229  | 292 | 8  | 10 | 18 |
| 2001 | 2112 | 163  | 353 | 6  | 13 | 20 |
| 2000 | 2060 | 193  | 358 | 7  | 14 | 21 |
| 1999 | 1635 | 138  | 276 | 7  | 13 | 20 |
| 1998 | 1843 | 201  | 280 | 9  | 12 | 21 |
| 1997 | 2043 | 213  | 289 | 8  | 11 | 20 |



## 8. Citation statistics

Citation statistics for individual articles are available at <https://publif.iucr.org/orcid/citations.php>

|           | Category                                                                                                       | Impact factor |       |       |       |       |       |       |       |
|-----------|----------------------------------------------------------------------------------------------------------------|---------------|-------|-------|-------|-------|-------|-------|-------|
|           |                                                                                                                | 2015          | 2016  | 2017  | 2018  | 2019  | 2020  | 2021  | 2022  |
| Section A | Chemistry, multidisciplinary<br>Crystallography                                                                | 2.333         | 5.725 | 7.930 | 1.878 | 1.960 | 2.290 | 2.331 | 1.826 |
| Section B | Chemistry, multidisciplinary<br>Crystallography                                                                | 2.892         | 2.032 | 6.467 | 6.732 | 2.048 | 2.266 | 2.684 | 1.880 |
| Section C | Chemistry, multidisciplinary<br>Crystallography                                                                | 0.479         | 4.099 | 8.678 | 0.930 | 1.090 | 1.172 | 1.184 | 0.786 |
| Section D | Biochemistry and molecular biology<br>Biochemical research methods<br>Biophysics<br>Crystallography            | 2.512         | 2.114 | 3.099 | 3.227 | 5.266 | 7.652 | 5.699 | 2.176 |
| Section E | Crystallography                                                                                                |               |       |       |       |       |       |       | 0.910 |
| Section F | Biochemistry and molecular biology<br>Biochemical research methods<br>Biology<br>Biophysics<br>Crystallography | 0.647         | 0.799 | 0.989 | 1.199 | 0.968 | 1.056 | 1.072 | 0.894 |
| JAC       | Chemistry, multidisciplinary<br>Crystallography                                                                | 2.570         | 2.614 | 3.422 | 2.867 | 2.995 | 3.304 | 4.868 | 6.134 |
| JSR       | Instruments and instrumentation<br>Optics<br>Physics applied                                                   | 1.877         | 3.011 | 3.232 | 2.452 | 2.251 | 2.616 | 2.557 | 2.450 |
| IUCrJ     | Chemistry, multidisciplinary<br>Crystallography<br>Materials science, multidisciplinary                        | 5.316         | 5.793 | 6.544 | 4.756 | 5.401 | 4.769 | 5.588 | 3.925 |

| Rank | Journal                     | Impact factor |
|------|-----------------------------|---------------|
| 1.   | <i>J APPL CRYSTALLOGR</i>   | 6.1           |
| 2.   | <i>PROG CRYST GROWTH CH</i> | 5.1           |
| 3.   | <i>LIQ CRYST REV</i>        | 5.1           |
| 4.   | <i>IUCrJ</i>                | 3.9           |
| 5.   | <i>CRYST GROWTH DES</i>     | 3.8           |
| 6.   | <i>LIQ CRYST TODAY</i>      | 3.1           |
| 7.   | <i>CRYSTENGCOMM</i>         | 3.1           |
| 8.   | <i>CRYSTALLOGR REV</i>      | 3.0           |
| 9.   | <i>J MOL GRAPH MODEL</i>    | 2.9           |
| 10.  | <i>CRYSTALS</i>             | 2.7           |
| 11.  | <i>POLYHEDRON</i>           | 2.6           |
| 12.  | <i>ACTA CRYSTALLOGR D</i>   | 2.2           |
| 13.  | <i>LIQUID CRYSTALS</i>      | 2.2           |
| 14.  | <i>CHIN J STRUCT CHEM</i>   | 2.2           |
| 15.  | <i>ACTA CRYSTALLOGR B</i>   | 1.9           |
| 16.  | <i>POLYM CRYSTAL</i>        | 1.9           |
| 17.  | <i>ACTA CRYSTALLOGR A</i>   | 1.8           |
| 18.  | <i>J CRYST GROWTH</i>       | 1.8           |
| 19.  | <i>STRUCT CHEM</i>          | 1.7           |
| 20.  | <i>PHASE TRANSIT</i>        | 1.6           |
| 21.  | <i>CRYST RES TECHNOL</i>    | 1.5           |
| 22.  | <i>Z KRISTALLOGR</i>        | 1.2           |
| 23.  | <i>ACTA CRYSTALLOGR E</i>   | 0.9           |
| 24.  | <i>ACTA CRYSTALLOGR F</i>   | 0.9           |
| 25.  | <i>ACTA CRYSTALLOGR C</i>   | 0.8           |
| 26.  | <i>J CHEM CRYSTALLOGR</i>   | 0.8           |
| 27.  | <i>CRYSTALLOGR REP+</i>     | 0.7           |
| 28.  | <i>MOL CRYST LIQ CRYST</i>  | 0.7           |
| 29.  | <i>CHIN J LIQ CRYST DIS</i> | 0.6           |
| 30.  | <i>LIQ CRYST APPL</i>       | 0.5           |
| 31.  | <i>Z KRIST-NEW CRYST ST</i> | 0.2           |
| 32.  | <i>X-RAY STRUCT ANAL ON</i> | 0.2           |
| 33.  | <i>J KOR CRYST GROWTH C</i> | 0.2           |



## 9. Download statistics

Open-access articles are marked with an asterisk.

### 9.1. Summary

|                         | html    | pdf     | Total    | 2022 total | 2021 total | 2020 total | 2019 total | 2018 total |
|-------------------------|---------|---------|----------|------------|------------|------------|------------|------------|
| Acta Cryst. (1948-1967) |         | 79515   | 79515    | 102060     | 92145      | 93081      | 87836      | 68298      |
| Acta Cryst. Section A   | 268791  | 1056614 | 1325405  | 1884710    | 2136229    | 1364108    | 1707901    | 1018143    |
| Acta Cryst. Section B   | 249889  | 144985  | 394874   | 413700     | 445524     | 508102     | 424889     | 354971     |
| Acta Cryst. Section C   | 217620  | 137929  | 355549   | 303777     | 422246     | 684510     | 438876     | 313754     |
| Acta Cryst. Section D   | 674608  | 238457  | 913065   | 1142019    | 1096292    | 1435520    | 1256349    | 1099362    |
| Acta Cryst. Section E   | 3797709 | 1688408 | 5486117  | 6153584    | 5573378    | 7394591    | 5706178    | 5082740    |
| Acta Cryst. Section F   | 280898  | 72080   | 352978   | 346562     | 330447     | 443416     | 346990     | 342264     |
| JAC                     | 943719  | 275984  | 1219703  | 883669     | 812481     | 909527     | 853449     | 887705     |
| JSR                     | 1538321 | 322670  | 1860991  | 1441844    | 629125     | 799397     | 752576     | 593218     |
| IUCrJ                   | 712638  | 138141  | 850779   | 911108     | 666641     | 789153     | 696050     | 632853     |
| IUCrData                | 599753  | 180314  | 780067   | 540634     | 408313     | 562863     | 92785      | 58678      |
| Total                   | 9283946 | 4335097 | 13619043 | 14123667   | 12612821   | 14984268   | 12363879   | 10451986   |

### 9.2. Acta Crystallographica (1948-1967)

| Downloads | Title                                                                                              | Authors                                | Reference                   |
|-----------|----------------------------------------------------------------------------------------------------|----------------------------------------|-----------------------------|
| 2548      | The structure of sodium thymonucleate fibres. I. The influence of water content                    | Franklin, R.E. and Gosling, R.G.       | Acta Cryst. (1953). 6, 673  |
| 1533      | The structure of sodium thymonucleate fibres. II. The cylindrically symmetrical Patterson function | Franklin, R.E. and Gosling, R.G.       | Acta Cryst. (1953). 6, 678  |
| 448       | The packing of [alpha]-helices: simple coiled-coils                                                | Crick, F.H.C.                          | Acta Cryst. (1953). 6, 689  |
| 409       | The structure of graphitic carbons                                                                 | Franklin, R.E.                         | Acta Cryst. (1951). 4, 253  |
| 385       | The scattering of electrons by atoms and crystals. I. A new theoretical approach                   | Cowley, J.M. and Moodie, A.F.          | Acta Cryst. (1957). 10, 609 |
| 374       | Abstracts of Papers                                                                                |                                        | Acta Cryst. (1954). 7, 616  |
| 334       | Peter Debye, 1884-1966                                                                             | Ewald, P.P.                            | Acta Cryst. (1967). 22, 947 |
| 295       | The crystal structure of ferrocene                                                                 | Dunitz, J.D., Orgel, L.E. and Rich, A. | Acta Cryst. (1956). 9, 373  |
| 251       | The structure of synthetic polypeptides. I. The transform of atoms on a helix                      | Cochran, W., Crick, F.H. and Vand, V.  | Acta Cryst. (1952). 5, 581  |
| 229       | Angle calculations for 3- and 4-circle X-ray and neutron diffractometers                           | Busing, W.R. and Levy, H.A.            | Acta Cryst. (1967). 22, 457 |

### 9.3. Acta Crystallographica Section A

| Downloads | Title                                                                                                         | Authors                      | Reference                   |
|-----------|---------------------------------------------------------------------------------------------------------------|------------------------------|-----------------------------|
| 5493      | A short history of SHELX                                                                                      | Sheldrick, G.M.              | Acta Cryst. (2008). 64, 112 |
| 5383*     | SHELXT - Integrated space-group and crystal-structure determination                                           | Sheldrick, G.M.              | Acta Cryst. (2015). 71, 3   |
| 3659*     | On the combinatorics of crystal structures. II. Number of Wyckoff sequences of a given subdivision complexity | Hornfeck, W. and Cervený, K. | Acta Cryst. (2023). 79, 280 |
| 2935      | Report of the Executive Committee for 2020                                                                    | Ashcroft, A.T.               | Acta Cryst. (2022). 78, 65  |
| 2217      | Revised effective ionic radii and systematic studies of interatomic distances in halides and chalcogenides    | Shannon, R.D.                | Acta Cryst. (1976). 32, 751 |
| 2214      | Report of the Executive Committee for 2002                                                                    | Dacombe, M.                  | Acta Cryst. (2003). 59, 588 |

### 9.3. Acta Crystallographica Section A

| Downloads | Title                                                                                                                           | Authors                                                                                  | Reference                   |
|-----------|---------------------------------------------------------------------------------------------------------------------------------|------------------------------------------------------------------------------------------|-----------------------------|
| 2111      | The Protein Data Bank: a historical perspective                                                                                 | Berman, H.M.                                                                             | Acta Cryst. (2008). 64, 88  |
| 2068*     | Arithmetic proof of the multiplicity-weighted Euler characteristic for symmetrically arranged space-filling polyhedra           | Naskrecki, B., Dauter, Z. and Jaskolski, M.                                              | Acta Cryst. (2021). 77, 126 |
| 1714*     | Optimal estimated standard uncertainties of reflection intensities for kinematical refinement from 3D electron diffraction data | Khouchen, M., Klar, P.B., Chintakindi, H., Suresh, A. and Palatinus, L.                  | Acta Cryst. (2023). 79, 427 |
| 1689*     | Dynamic tilting in perovskites                                                                                                  | Handley, C.M., Ward, R.E., Freeman, C.L., Reaney, I.M., Sinclair, D.C. and Harding, J.H. | Acta Cryst. (2023). 79, 163 |
| 1572*     | Crystal diffraction prediction and partiality estimation using Gaussian basis functions                                         | Brehm, W., White, T. and Chapman, H.N.                                                   | Acta Cryst. (2023). 79, 145 |
| 1515*     | Dynamical diffraction of high-energy electrons by light-atom structures: a multiple forward scattering interpretation           | Drevon, T.R., Waterman, D.G. and Krissinel, E.                                           | Acta Cryst. (2023). 79, 180 |

### 9.4. Acta Crystallographica Section B

| Downloads | Title                                                                                                                                                                                                   | Authors                                                                                              | Reference                    |
|-----------|---------------------------------------------------------------------------------------------------------------------------------------------------------------------------------------------------------|------------------------------------------------------------------------------------------------------|------------------------------|
| 3630*     | The Cambridge Structural Database                                                                                                                                                                       | Groom, C.R., Bruno, I.J., Lightfoot, M.P. and Ward, S.C.                                             | Acta Cryst. (2016). B72, 171 |
| 3229*     | Report on the sixth blind test of organic crystal structure prediction methods                                                                                                                          | Reilly, et al.                                                                                       | Acta Cryst. (2016). B72, 439 |
| 3011      | Crystalline metal-organic frameworks (MOFs): synthesis, structure and function                                                                                                                          | Dey, C., Kundu, T., Biswal, B.P., Mallick, A. and Banerjee, R.                                       | Acta Cryst. (2014). B70, 3   |
| 2704      | Understanding geology through crystal engineering: coordination complexes, coordination polymers and metal-organic frameworks as minerals                                                               | Huskić, I. and Friscić, T.                                                                           | Acta Cryst. (2018). B74, 539 |
| 2597*     | Direct interpretation of the X-ray and neutron three-dimensional difference pair distribution functions (3D-[Delta]PDFs) of yttria-stabilized zirconia                                                  | Schmidt, E.M., Neder, R.B., Martin, J.D., Minelli, A., Lemée, M.-H. and Goodwin, A.L.                | Acta Cryst. (2023). B79, 138 |
| 1929      | Structural studies of metal-organic frameworks under high pressure                                                                                                                                      | McKellar, S.C. and Moggach, S.A.                                                                     | Acta Cryst. (2015). B71, 587 |
| 1788      | A new home for studies of crystal growth and characterisation                                                                                                                                           | Blake, A.J., de Boissieu, M., Nangia, A., Boldyreva, E., Katrusiak, A., Bekker, T.B. and Knope, K.E. | Acta Cryst. (2021). B77, 456 |
| 1712*     | Synthesis and structure of two novel transplatinum complexes                                                                                                                                            | Vinci, D. and Chateigner, D.                                                                         | Acta Cryst. (2023). B79, 213 |
| 1572*     | Analysis of diffuse scattering in electron diffraction data for the crystal structure determination of Pigment Orange 13, C <sub>32</sub> H <sub>24</sub> Cl <sub>2</sub> N <sub>8</sub> O <sub>2</sub> | Gorelik, T.E., Bekö, S.L., Teteruk, J., Heyse, W. and Schmidt, M.U.                                  | Acta Cryst. (2023). B79, 122 |
| 1499*     | Structure of boehmite-derived [gamma]-alumina and its transformation mechanism revealed by electron crystallography                                                                                     | Luo, Z.                                                                                              | Acta Cryst. (2021). B77, 772 |
| 1499*     | Crystallographic studies of gas sorption in metal-organic frameworks                                                                                                                                    | Carrington, E.J., Vitórica-Yrezábal, I.J. and Brammer, L.                                            | Acta Cryst. (2014). B70, 404 |
| 1494*     | Automated electron diffraction tomography - development and applications                                                                                                                                | Kolb, U., Krysiak, Y. and Plana-Ruiz, S.                                                             | Acta Cryst. (2019). B75, 463 |

### 9.5. Acta Crystallographica Section C

| Downloads       | Title                                                                                                                                                                                                                              | Authors                                                                                                     | Reference                                                 |
|-----------------|------------------------------------------------------------------------------------------------------------------------------------------------------------------------------------------------------------------------------------|-------------------------------------------------------------------------------------------------------------|-----------------------------------------------------------|
| 10026*<br>4093* | Crystal structure refinement with SHELXL<br>Psilocybin: crystal structure solutions enable phase analysis of prior art and recently patented examples                                                                              | Sheldrick, G.M.<br>Sherwood, A.M., Kargbo, R.B., Kaylo, K.W., Cozzi, N.V., Meisenheimer, P. and Kaduk, J.A. | Acta Cryst. (2015). C71, 3<br>Acta Cryst. (2022). C78, 36 |
| 3909*           | Geometric isomers of dichloridoiron(III) complexes of CTMC (5,7,12,14-tetramethyl-1,4,8,11-tetraazacyclotetradecane)                                                                                                               | DeLancey, S.S., Clending, R.A., Zeller, M. and Ren, T.                                                      | Acta Cryst. (2022). C78, 507                              |
| 2712*           | Halogen bonds, chalcogen bonds, pnictogen bonds, tetrel bonds and other [sigma]-hole interactions: a snapshot of current progress                                                                                                  | Brammer, L., Peuronen, A. and Roseveare, T.M.                                                               | Acta Cryst. (2023). C79, 204                              |
| 1823*           | Pathological crystal structures                                                                                                                                                                                                    | Raymond, K.N. and Girolami, G.S.                                                                            | Acta Cryst. (2023). C79, 445                              |
| 1759            | PLATON SQUEEZE: a tool for the calculation of the disordered solvent contribution to the calculated structure factors                                                                                                              | Spek, A.L.                                                                                                  | Acta Cryst. (2015). C71, 9                                |
| 1612*           | Chalcogen bonding in the solid-state structures of 1,3-bis(benzimidazoliumyl)benzene-based chalcogen-bonding donors                                                                                                                | Steinke, T., Engelage, E. and Huber, S.M.                                                                   | Acta Cryst. (2023). C79, 26                               |
| 1250*           | High-resolution structural study on pyridin-3-yl ebselen and its N-methylated tosylate and iodide derivatives                                                                                                                      | Xu, R., Fellowes, T. and White, J.M.                                                                        | Acta Cryst. (2023). C79, 43                               |
| 1186*           | Synthesis and characterization of the 'Japanese rice-ball'-shaped Molybdenum Blue                                                                                                                                                  | Al-Sayed, E., Tanuhadi, E., Giester, G. and Rompel, A.                                                      | Acta Cryst. (2022). C78, 299                              |
| 1181*           | Crystal structure and characterization of the sulfamethazine-piperidine salt                                                                                                                                                       | González-González, et al.                                                                                   | Acta Cryst. (2023). C79, 71                               |
| 1172*           | Halogen, chalcogen, and hydrogen bonding in organoiodine cocrystals of heterocyclic thiones: imidazolidine-2-thione, 2-mercaptobenzimidazole, 2-mercapto-5-methylbenzimidazole, 2-mercaptobenzoxazole, and 2-mercaptobenzothiazole | Watts, S., Peloquin, A.J., Bandara, M., McMillen, C.D. and Pennington, W.T.                                 | Acta Cryst. (2022). C78, 702                              |
| 1148*           | Optimizing disordered crystal structures                                                                                                                                                                                           | Linden, A.                                                                                                  | Acta Cryst. (2023). C79, 69                               |

### 9.6. Acta Crystallographica Section D

| Downloads      | Title                                                                                                             | Authors                                                                                  | Reference                                                      |
|----------------|-------------------------------------------------------------------------------------------------------------------|------------------------------------------------------------------------------------------|----------------------------------------------------------------|
| 7674           | AlphaFold and the future of structural biology                                                                    | Read, R.J., Baker, E.N., Bond, C.S., Garman, E.F. and van Raaij, M.J.                    | Acta Cryst. (2023). D79, 556                                   |
| 7651*<br>4841* | Rotations and rotation matrices<br>Crystal structure of a covalently linked Aurora-A-MYCN complex                 | Evans, P.R.<br>Diebold, M., Schönemann, L., Eilers, M., Sotriffer, C. and Schindelin, H. | Acta Cryst. (2001). D57, 1355<br>Acta Cryst. (2023). D79, 1    |
| 4565*          | Features and development of Coot                                                                                  | Emsley, P., Lohkamp, B., Scott, W.G. and Cowtan, K.                                      | Acta Cryst. (2010). D66, 486                                   |
| 4030*          | The CCP4 suite: integrative software for macromolecular crystallography                                           | Agirre, et al.                                                                           | Acta Cryst. (2023). D79, 449                                   |
| 3716*<br>3535* | Introduction to twinning<br>How good are my data and what is the resolution?                                      | Parsons, S.<br>Evans, P.R. and Murshudov, G.N.                                           | Acta Cryst. (2003). D59, 1995<br>Acta Cryst. (2013). D69, 1204 |
| 3470*<br>3285* | XDS<br>Macromolecular structure determination using X-rays, neutrons and electrons: recent developments in Phenix | Kabsch, W.<br>Lieschner, et al.                                                          | Acta Cryst. (2010). D66, 125<br>Acta Cryst. (2019). D75, 861   |

### 9.6. Acta Crystallographica Section D

| Downloads | Title                                                                                  | Authors                                    | Reference                     |
|-----------|----------------------------------------------------------------------------------------|--------------------------------------------|-------------------------------|
| 3232*     | Errors in structural biology are not the exception                                     | Gao, Y., Thorn, V. and Thorn, A.           | Acta Cryst. (2023). D79, 206  |
| 3166*     | Coot: model-building tools for molecular graphics                                      | Emsley, P. and Cowtan, K.                  | Acta Cryst. (2004). D60, 2126 |
| 3141*     | Protein structure prediction by AlphaFold2: are attention and symmetries all you need? | Bouatta, N., Sorger, P. and AlQuraishi, M. | Acta Cryst. (2021). D77, 982  |

### 9.7. Acta Crystallographica Section E

| Downloads | Title                                                                                                                                                                             | Authors                                                                                                         | Reference                     |
|-----------|-----------------------------------------------------------------------------------------------------------------------------------------------------------------------------------|-----------------------------------------------------------------------------------------------------------------|-------------------------------|
| 7053*     | Golden oldies: ten crystallography articles that we think must be read                                                                                                            | Massera, C. and Helliwell, J.R.                                                                                 | Acta Cryst. (2023). E79, 580  |
| 2878*     | checkCIF validation ALERTS: what they mean and how to respond                                                                                                                     | Spek, A.L.                                                                                                      | Acta Cryst. (2020). E76, 1    |
| 2392*     | Electron crystallography and dedicated electron-diffraction instrumentation                                                                                                       | Simoncic, P., Romeijn, E., Hovestreydt, E., Steinfeld, G., Santiso-Quiñones, G. and Merkelbach, J.              | Acta Cryst. (2023). E79, 410  |
| 2030*     | A lanthanum(III) complex with a lacunary polyoxotungstate: Na <sub>2</sub> (NH <sub>4</sub> ) <sub>7</sub> [La(W <sub>5</sub> O <sub>18</sub> ) <sub>2</sub> ].16H <sub>2</sub> O | Almeida Paz, F.A., Balula, M.S.S., Cavaleiro, A.M.V., Klinowski, J. and Nogueira, H.I.S.                        | Acta Cryst. (2005). E61, i28  |
| 1867*     | N-(5-Chloro-2-nitrobenzoyl)-N'-isonicotinoylhydrazine: a three-dimensional framework containing four types of hydrogen bond                                                       | Souza, M.V.N. de, Wardell, S.M.S.V., Wardell, J.L., Low, J.N. and Glidewell, C.                                 | Acta Cryst. (2007). E63, o230 |
| 1859*     | A periodic-like table of space groups                                                                                                                                             | Kahr, B.                                                                                                        | Acta Cryst. (2023). E79, 124  |
| 1833*     | Crystal structure and Hirshfeld surface analysis of 2,2'-[(3,5-di-tert-butyl-4-hydroxyphenyl)methanediyl]bis(3-hydroxy-5,5-dimethylcyclohex-2-en-1-one)                           | Khalilov, A.N., Khrustalev, V.N., Aleksandrova, L.V., Akkurt, M., Rzayev, R.M., Bhattarai, A. and Mamedov, I.G. | Acta Cryst. (2023). E79, 436  |
| 1652*     | Crystal structure of serotonin                                                                                                                                                    | Naeem, M., Chadeayne, A.R., Golen, J.A. and Manke, D.R.                                                         | Acta Cryst. (2022). E78, 365  |
| 1517*     | Crystal structure of zymonic acid and a re-determination of its precursor, pyruvic acid                                                                                           | Heger, D., Eugene, A.J., Parkin, S.R. and Guzman, M.I.                                                          | Acta Cryst. (2019). E75, 858  |
| 1437*     | Crystal and molecular structure of 4-fluoro-1H-pyrazole at 150 K                                                                                                                  | Ahmed, B.M., Zeller, M. and Mezei, G.                                                                           | Acta Cryst. (2023). E79, 428  |
| 1390*     | Norpillocin: freebase and fumarate salt                                                                                                                                           | Chadeayne, A.R., Pham, D.N.K., Golen, J.A. and Manke, D.R.                                                      | Acta Cryst. (2020). E76, 589  |
| 1357*     | Utilizing Hirshfeld surface calculations, non-covalent interaction (NCI) plots and the calculation of interaction energies in the analysis of molecular packing                   | Tan, S.L., Jotani, M.M. and Tiekink, E.R.T.                                                                     | Acta Cryst. (2019). E75, 308  |

### 9.8. Acta Crystallographica Section F

| Downloads | Title                                                                                        | Authors                                                                    | Reference                    |
|-----------|----------------------------------------------------------------------------------------------|----------------------------------------------------------------------------|------------------------------|
| 7960*     | Structure of the imine reductase from <i>Ajellomyces dermatitidis</i> in three crystal forms | Sharma, M., Cuetos, A., Williams, A., González-Martínez, D. and Grogan, G. | Acta Cryst. (2023). F79, 224 |
| 7630*     | Joint X-ray/neutron structure of <i>Lentinus similis</i> AA9A at room temperature            | Tandrup, T., Lo Leggio, L. and Meilleur, F.                                | Acta Cryst. (2023). F79, 1   |
| 7167*     | High-resolution crystal structure of the Mu8.1 conotoxin from <i>Conus mucronatus</i>        | Müller, E., Hackney, C.M., Ellgaard, L. and Morth, J.P.                    | Acta Cryst. (2023). F79, 240 |

### 9.8. Acta Crystallographica Section F

| Downloads | Title                                                                                                                                                                | Authors                                                                                                                 | Reference                    |
|-----------|----------------------------------------------------------------------------------------------------------------------------------------------------------------------|-------------------------------------------------------------------------------------------------------------------------|------------------------------|
| 7008*     | Structures of chloramphenicol acetyltransferase III and Escherichia coli [beta]-ketoacylsynthase III co-crystallized with partially hydrolysed acetyl-oxa(dethia)CoA | Benjamin, A.B., Stunkard, L.M., Ling, J., Nice, J.N. and Lohman, J.R.                                                   | Acta Cryst. (2023). F79, 61  |
| 6356*     | Biochemical and X-ray analyses of the players involved in the faRel2/aTfaRel2 toxin-antitoxin operon                                                                 | Dominguez-Molina, L., Talavera, A., Cepauskas, A., Kurata, T., Echemendia-Blanco, D., Hauryliuk, V. and Garcia-Pino, A. | Acta Cryst. (2023). F79, 247 |
| 5841*     | Room-temperature serial synchrotron crystallography of the human phosphatase PTP1B                                                                                   | Sharma, S., Ebrahim, A. and Keedy, D.A.                                                                                 | Acta Cryst. (2023). F79, 23  |
| 5406*     | Making your raw data available to the macromolecular crystallography community                                                                                       | Kroon-Batenburg, L.M.J.                                                                                                 | Acta Cryst. (2023). F79, 267 |
| 4767*     | Purification and structure of luminal domain C of human Niemann-Pick C1 protein                                                                                      | Odongo, L., Zadrozny, K.K., Diehl, W.E., Luban, J., White, J.M., Ganser-Pornillos, B.K., Tamm, L.K. and Pornillos, O.   | Acta Cryst. (2023). F79, 45  |
| 4716*     | Structural and biophysical characterization of the Borna disease virus 1 phosphoprotein                                                                              | Whitehead, J.D., Grimes, J.M. and Keown, J.R.                                                                           | Acta Cryst. (2023). F79, 51  |
| 3145      | Crystal structure of adenylosuccinate lyase from the thermophilic bacterium Thermus thermophilus HB8                                                                 | Nemoto, N., Kawai, G. and Sampei, G.                                                                                    | Acta Cryst. (2023). F79, 278 |
| 3074      | Introduction to protein crystallization                                                                                                                              | McPherson, A. and Gavira, J.A.                                                                                          | Acta Cryst. (2014). F70, 2   |
| 2789*     | TssA from Burkholderia cenocepacia: expression, purification, crystallization and crystallographic analysis                                                          | Owen, H.J., Sun, R., Ahmad, A., Sedelnikova, S.E., Baker, P.J., Thomas, M.S. and Rice, D.W.                             | Acta Cryst. (2018). F74, 536 |

### 9.9. Journal of Applied Crystallography

| Downloads | Title                                                                                                                        | Authors                                                                                  | Reference                       |
|-----------|------------------------------------------------------------------------------------------------------------------------------|------------------------------------------------------------------------------------------|---------------------------------|
| 9032*     | Specimen-displacement correction for powder X-ray diffraction in Debye-Scherrer geometry with a flat area detector           | Hulbert, B.S. and Kriven, W.M.                                                           | J. Appl. Cryst. (2023). 56, 160 |
| 8892*     | An inclined detector geometry for improved X-ray total scattering measurements                                               | Burns, N., Rahemtulla, A., Annett, S., Moreno, B. and Kycia, S.                          | J. Appl. Cryst. (2023). 56, 510 |
| 8228*     | A reactor for time-resolved X-ray studies of nucleation and growth during solvothermal synthesis                             | Roelsgaard, et al.                                                                       | J. Appl. Cryst. (2023). 56, 581 |
| 8217*     | Modelling the structural disorder in trigonal-prismatic coordinated transition metal dichalcogenides                         | Ursi, F., Virga, S., Pipitone, C., Sanson, A., Longo, A., Giannici, F. and Martorana, A. | J. Appl. Cryst. (2023). 56, 502 |
| 8064*     | xrd simulator: 3D X-ray diffraction simulation software supporting 3D polycrystalline microstructure morphology descriptions | Henningsson, A. and Hall, S.A.                                                           | J. Appl. Cryst. (2023). 56, 282 |

### 9.9. *Journal of Applied Crystallography*

| Downloads | Title                                                                                                                                                         | Authors                                                                                                                                                                                                                                                            | Reference                        |
|-----------|---------------------------------------------------------------------------------------------------------------------------------------------------------------|--------------------------------------------------------------------------------------------------------------------------------------------------------------------------------------------------------------------------------------------------------------------|----------------------------------|
| 7680*     | A versatile approach to high-density microcrystals in lipidic cubic phase for room-temperature serial crystallography                                         | Birch, J., Kwan, T.O.C., Judge, P.J., Axford, D., Aller, P., Butryn, A., Reis, R.I., Bada Juarez, J.F., Vinals, J., Owen, R.L., Nango, E., Tanaka, R., Tono, K., Joti, Y., Tanaka, T., Owada, S., Sugahara, M., Iwata, S., Orville, A.M., Watts, A. and Moraes, I. | J. Appl. Cryst. (2023). 56, 1361 |
| 7604*     | CrystalMELA: a new crystallographic machine learning platform for crystal system determination                                                                | Corriero, N., Rizzi, R., Settembre, G., Del Buono, N. and Diacono, D.                                                                                                                                                                                              | J. Appl. Cryst. (2023). 56, 409  |
| 7559*     | POWTEX visits POWGEN                                                                                                                                          | Houben, A., Meinerzhagen, Y., Nachtigall, N., Jacobs, P. and Dronskowski, R.                                                                                                                                                                                       | J. Appl. Cryst. (2023). 56, 633  |
| 7529*     | Kinematic scattering by nanocrystals                                                                                                                          | Thomas, O. and Noyan, I.C.                                                                                                                                                                                                                                         | J. Appl. Cryst. (2023). 56, 128  |
| 7177*     | Three-phase material mapping with incomplete X-ray diffraction spectral information                                                                           | Chang, X., Lavernhe-Taillard, K., Roux, S. and Hubert, O.                                                                                                                                                                                                          | J. Appl. Cryst. (2023). 56, 750  |
| 7157*     | Implication of the double-gating mode in a hybrid photon counting detector for measurements of transient heat conduction in GaAs/AlAs superlattice structures | Naumenko, D., Burian, M., Marmioli, B., Haider, R., Radeticchio, A., Wagner, L., Piazza, L., Glatt, L., Brandstetter, S., Dal Zilio, S., Biasiol, G. and Amenitsch, H.                                                                                             | J. Appl. Cryst. (2023). 56, 961  |
| 7115*     | On the dependence of creep-induced dislocation configurations on crystallographic orientation in pure Al and Al-Mg                                            | Fernández, R., Bokuchava, G., Bruno, G., Serrano-Muñoz, I. and González-Doncel, G.                                                                                                                                                                                 | J. Appl. Cryst. (2023). 56, 764  |

### 9.10. *Journal of Synchrotron Radiation*

| Downloads | Title                                                                                                                            | Authors                                                                                                                   | Reference                           |
|-----------|----------------------------------------------------------------------------------------------------------------------------------|---------------------------------------------------------------------------------------------------------------------------|-------------------------------------|
| 43169*    | Counting on the future: fast charge-integrating detectors for X-ray nanoimaging                                                  | Deng, J., Miceli, A. and Jacobsen, C.                                                                                     | J. Synchrotron Rad. (2023). 30, 859 |
| 42395*    | FlexPES: a versatile soft X-ray beamline at MAX IV Laboratory                                                                    | Preobrajenski, A., Generalov, A., Öhrwall, G., Tchapyguine, M., Tarawneh, H., Appelfeller, S., Frampton, E. and Walsh, N. | J. Synchrotron Rad. (2023). 30, 831 |
| 17513*    | Assessing an aqueous flow cell designed for in situ crystal growth under X-ray nanotomography and effects of radiolysis products | Yuan, K., Starchenko, V., Rampal, N., Yang, F., Xiao, X. and Stack, A.G.                                                  | J. Synchrotron Rad. (2023). 30, 634 |
| 12968*    | darfix - data analysis for dark-field X-ray microscopy                                                                           | Garriga Ferrer, J., Rodríguez-Lamas, R., Payno, H., De Nolf, W., Cook, P., Solé Jover, V.A., Yildirim, C. and Detlefs, C. | J. Synchrotron Rad. (2023). 30, 527 |
| 9036*     | Hard X-ray full-field nanoimaging using a direct photon-counting detector                                                        | Flenner, S., Hagemann, J., Wittwer, F., Longo, E., Kubec, A., Rothkirch, A., David, C., Müller, M. and Greving, I.        | J. Synchrotron Rad. (2023). 30, 390 |

### 9.10. *Journal of Synchrotron Radiation*

| Downloads | Title                                                                                                                                             | Authors                                                                                                                                                        | Reference                           |
|-----------|---------------------------------------------------------------------------------------------------------------------------------------------------|----------------------------------------------------------------------------------------------------------------------------------------------------------------|-------------------------------------|
| 8285*     | High-efficiency focusing and imaging by dielectric kinoform zone plate lenses with soft X-rays                                                    | Tong, X., Chen, Y., Xu, Z., Li, Y., Xing, Z., Mu, C., Zhao, J., Zhen, X., Mao, C. and Tai, R.                                                                  | J. Synchrotron Rad. (2023). 30, 319 |
| 7994*     | MAXPEEM: a spectromicroscopy beam-line at MAX IV laboratory                                                                                       | Niu, Y., Vinogradov, N., Preobrajenski, A., Struzzi, C., Sarpi, B., Zhu, L., Goliias, E. and Zakharov, A.                                                      | J. Synchrotron Rad. (2023). 30, 468 |
| 7945*     | Soft X-ray spectro-ptychography of boron nitride nanobamboos, carbon nanotubes and permalloy nanorods                                             | Vijayakumar, J., Yuan, H., Mille, N., Stanescu, S., Swaraj, S., Favre-Nicolin, V., Najafi, E., Hitchcock, A.P. and Belkhou, R.                                 | J. Synchrotron Rad. (2023). 30, 746 |
| 7913*     | Fly-scan-oriented motion analyses and upgraded beamline integration architecture for the High-Dynamic Double-Crystal Monochromator at Sirius/LNLS | Geraldes, R.R., Luiz, S.A.L., de Brito Neto, J.L., Soares, T.R.S., dos Reis, R.D., Calligaris, G.A., Witvoet, G. and Vermeulen, J.P.M.B.                       | J. Synchrotron Rad. (2023). 30, 90  |
| 7799*     | FOCUS: fast Monte Carlo approach to coherence of undulator sources                                                                                | Siano, M., Geloni, G., Paroli, B., Butti, D., Lefèvre, T., Mazzoni, S., Trad, G., Iriso, U., Nosych, A.A., Torino, L. and Potenza, M.A.C.                      | J. Synchrotron Rad. (2023). 30, 217 |
| 7733*     | Beam damage in operando X-ray diffraction studies of Li-ion batteries                                                                             | Christensen, C.K., Karlsen, M.A., Drejer, A.Ø., Andersen, B.P., Jakobsen, C.L., Johansen, M., Sørensen, D.R., Kantor, I., Jørgensen, M.R.V. and Ravnsbæk, D.B. | J. Synchrotron Rad. (2023). 30, 561 |
| 7708*     | Online absolute calibration of fast FEL pulse energy measurements                                                                                 | Juranić, P., Alarcon, A. and Ischebeck, R.                                                                                                                     | J. Synchrotron Rad. (2023). 30, 500 |

### 9.11. *IUCrJ*

| Downloads | Title                                                                                                                                                                | Authors                                                                                                                                                          | Reference             |
|-----------|----------------------------------------------------------------------------------------------------------------------------------------------------------------------|------------------------------------------------------------------------------------------------------------------------------------------------------------------|-----------------------|
| 53185*    | Classification of perovskite structural types with dynamical octahedral tilting                                                                                      | Adams, D.J. and Churakov, S.V.                                                                                                                                   | IUCrJ (2023). 10, 309 |
| 10595*    | A Bayesian approach to beam-induced motion correction in cryo-EM single-particle analysis                                                                            | Zivanov, J., Nakane, T. and Scheres, S.H.W.                                                                                                                      | IUCrJ (2019). 6, 5    |
| 10374*    | Fast extraction of three-dimensional nanofiber orientation from WAXD patterns using machine learning                                                                 | Sun, M., Dong, Z., Wu, L., Yao, H., Niu, W., Xu, D., Chen, P., Gupta, H.S., Zhang, Y., Dong, Y., Chen, C. and Zhao, L.                                           | IUCrJ (2023). 10, 297 |
| 6639*     | Structure of a heterogeneous, glycosylated, lipid-bound, in vivo-grown protein crystal at atomic resolution from the viviparous cockroach <i>Diploptera punctata</i> | Banerjee, S., Coussens, N.P., Gallat, F.-X., Sathyanarayanan, N., Srikanth, J., Yagi, K.J., Gray, J.S.S., Tobe, S.S., Stay, B., Chavas, L.M.G. and Ramaswamy, S. | IUCrJ (2016). 3, 282  |
| 3867*     | ‘Cryo-EM’: electron cryomicroscopy, cryo electron microscopy or something else?                                                                                      | Henderson, R. and Hasnain, S.                                                                                                                                    | IUCrJ (2023). 10, 519 |
| 3482*     | Facing the phase problem                                                                                                                                             | Hendrickson, W.A.                                                                                                                                                | IUCrJ (2023). 10, 521 |
| 3319*     | Estimation of high-order aberrations and anisotropic magnification from cryo-EM data sets in RELION-3.1                                                              | Zivanov, J., Nakane, T. and Scheres, S. H. W.                                                                                                                    | IUCrJ (2020). 7, 253  |

9.11. *IUCrJ*

| Downloads | Title                                                                                                          | Authors                                                                                                                             | Reference             |
|-----------|----------------------------------------------------------------------------------------------------------------|-------------------------------------------------------------------------------------------------------------------------------------|-----------------------|
| 3044*     | Pressure effects on lipids and bio-membrane assemblies                                                         | Brooks, N.J.                                                                                                                        | IUCrJ (2014). 1, 470  |
| 2976*     | Hirshfeld atom refinement based on projector augmented wave densities with periodic boundary conditions        | Ruth, P.N., Herbst-Irmer, R. and Stalke, D.                                                                                         | IUCrJ (2022). 9, 286  |
| 2944*     | CSD Communications of the Cambridge Structural Database                                                        | Ferrence, G.M., Tovee, C.A., Holgate, S.J.W., Johnson, N.T., Lightfoot, M.P., Nowakowska-Orzechowska, K.L. and Ward, S.C.           | IUCrJ (2023). 10, 6   |
| 2843*     | Bone mineral properties and 3D orientation of human lamellar bone around cement lines and the Haversian system | Grünewald, T.A., Johannes, A., Wittig, N.K., Palle, J., Rack, A., Burghammer, M. and Birkedal, H.                                   | IUCrJ (2023). 10, 189 |
| 2737*     | JINXED: just in time crystallization for easy structure determination of biological macromolecules             | Henkel, A., Galchenkova, M., Maracke, J., Yefanov, O., Klopprogge, B., Hakanpää, J., Mesters, J.R., Chapman, H.N. and Oberthuer, D. | IUCrJ (2023). 10, 253 |

9.12. *IUCrData*

| Downloads | Title                                                                                                                                                             | Authors                                                                                                             | Reference                   |
|-----------|-------------------------------------------------------------------------------------------------------------------------------------------------------------------|---------------------------------------------------------------------------------------------------------------------|-----------------------------|
| 1713*     | Cyclohexane plastic phase I: single-crystal diffraction images and new structural model                                                                           | Bernès, S. and Camargo, S.                                                                                          | IUCrData (2023). 8, x230114 |
| 1626*     | Crystal structure reinvestigation of silver(I) fluoride, AgF                                                                                                      | Lozinsek, M., Belak Vivod, M. and Dragomir, M.                                                                      | IUCrData (2023). 8, x230018 |
| 1530*     | [3-Methoxy-5-(methoxycarbonyl)isoxazol-4-yl](4-methoxyphenyl)iodonium 2,2,2-trifluoroacetate                                                                      | Abdul Manan, M.A.F., Cordes, D.B., Slawin, A.M.Z. and O'Hagan, D.                                                   | IUCrData (2023). 8, x230300 |
| 1501*     | 5,8-Dihydroxy-2,2-dimethyl-12-(3-methylbut-2-enyl)pyrano[3,2-b]xanthen-6-one (brasixanthone B)                                                                    | Binti Seruji, N.M.U., Rosli, M.M., Jong, V.Y.M., Karunakaran, T., Lizazman, M.A., Marlina, A. and Binti Halid, Y.Y. | IUCrData (2023). 8, x221198 |
| 1469*     | (S)-2-[(S)-2,2,2-Trifluoro-1-hydroxyethyl]-1-tetralone                                                                                                            | Motaln, K., Cotman, A.E. and Lozinsek, M.                                                                           | IUCrData (2023). 8, x221209 |
| 1462*     | N-Methylserotonin hydrogen oxalate                                                                                                                                | Naeem, M., Anas, N.A., Chadeayne, A.R., Golen, J.A. and Manke, D.R.                                                 | IUCrData (2023). 8, x230378 |
| 1398*     | Methyl 1-[(6-methoxy-5-methylpyrimidin-4-yl)methyl]-1H-benzo[d]imidazole-7-carboxylate: a combined X-ray and DFT study                                            | Richter, A., Goddard, R., Schönefeld, R., Imming, P. and Seidel, R.W.                                               | IUCrData (2023). 8, x230025 |
| 1327*     | ([eta]5-Carboxycyclopentadienyl)([eta]7-cycloheptatrienyl)manganese(I) hexafluoridophosphate                                                                      | Thaler, R., Wurst, K. and Bildstein, B.                                                                             | IUCrData (2023). 8, x230107 |
| 1325*     | [(1,2,5,6-[eta])-Cycloocta-1,5-diene](4-isopropyl-1-methyl-1,2,4-triazol-5-ylidene)(triphenylphosphane)iridium(I) tetrafluoridoborate dichloromethane 0.8-solvate | Smith, T.E., Astashkin, A.V., Albert, D.R. and Rajaseelan, E.                                                       | IUCrData (2023). 8, x230064 |
| 1289*     | Aquatrifluoridoboron-1,3-dioxolan-2-one (1/2)                                                                                                                     | Radan, K., Forero-Saboya, J., Ponrouch, A. and Lozinsek, M.                                                         | IUCrData (2023). 8, x230062 |

9.12. *IUCrData*

| Downloads | Title                                | Authors                                                                                        | Reference                   |
|-----------|--------------------------------------|------------------------------------------------------------------------------------------------|-----------------------------|
| 1279*     | Meloxicam hydrochloride              | Flores Manuel, F., Sosa Rivadeneira, M. and Bernès, S.                                         | IUCrData (2023). 8, x230202 |
| 1270*     | 1,4-Phenylene diallyl bis(carbonate) | López-Velázquez, D., Núñez-Méndez, I., Bernès, S., Martínez-de la Luz, I. and Pérez-Cruz, M.A. | IUCrData (2023). 8, x230133 |

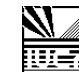

## 10. Number of open-access articles

|             | Pre 2004 | 2004 | 2005 | 2006 | 2007 | 2008 | 2009 | 2010 | 2011 | 2012 | 2013 | 2014 | 2015 | 2016 | 2017 | 2018 | 2019 | 2020 | 2021 | 2022 | 2023 |
|-------------|----------|------|------|------|------|------|------|------|------|------|------|------|------|------|------|------|------|------|------|------|------|
| Section A   | 6        | 7    | 9    | 3    | 4    | 0    | 0    | 2    | 6    | 3    | 4    | 4    | 9    | 7    | 5    | 13   | 28   | 21   | 20   | 16   | 24   |
| Section B   | 0        | 8    | 20   | 32   | 5    | 1    | 2    | 3    | 5    | 0    | 6    | 8    | 9    | 10   | 8    | 8    | 12   | 19   | 31   | 22   | 19   |
| Section C   | 0        | 57   | 76   | 72   | 19   | 2    | 1    | 1    | 0    | 0    | 0    | 1    | 3    | 0    | 3    | 6    | 9    | 22   | 19   | 24   | 25   |
| Section D   | 124      | 67   | 37   | 57   | 24   | 33   | 43   | 38   | 27   | 41   | 78   | 101  | 84   | 59   | 56   | 66   | 60   | 70   | 93   | 83   | 77   |
| Section E   | 0        | 109  | 191  | 189  | 59   | 3558 | 4166 | 4113 | 4444 | 4047 | 1964 | 1336 | 1168 | 450  | 458  | 411  | 393  | 366  | 263  | 261  | 242  |
| Section F   | 0        | 0    | 28   | 35   | 13   | 8    | 11   | 41   | 42   | 15   | 22   | 36   | 41   | 27   | 22   | 28   | 16   | 28   | 23   | 31   | 18   |
| Acta Cryst. | 130      | 248  | 361  | 388  | 124  | 3602 | 4223 | 4198 | 4524 | 4106 | 2074 | 1486 | 1314 | 553  | 552  | 532  | 518  | 526  | 449  | 437  | 405  |
| JAC         | 3        | 31   | 16   | 18   | 151  | 11   | 12   | 11   | 6    | 7    | 42   | 20   | 55   | 60   | 55   | 38   | 33   | 55   | 83   | 99   | 109  |
| JSR         | 0        | 7    | 24   | 4    | 9    | 35   | 11   | 25   | 64   | 29   | 71   | 52   | 84   | 53   | 54   | 88   | 87   | 91   | 108  | 169  | 129  |
| IUCrJ       | –        | –    | –    | –    | –    | –    | –    | –    | –    | –    | –    | 70   | 81   | 57   | 93   | 98   | 120  | 129  | 108  | 89   | 80   |
| IUCrData    | –        | –    | –    | –    | –    | –    | –    | –    | –    | –    | –    | –    | –    | 517  | 375  | 243  | 165  | 140  | 96   | 94   | 123  |
| Totals      | 133      | 286  | 401  | 410  | 284  | 3648 | 4246 | 4234 | 4594 | 4142 | 2187 | 1628 | 1534 | 1240 | 1129 | 999  | 923  | 941  | 844  | 888  | 846  |



## 11. Category statistics

### 11.1. *Acta Crystallographica Section A*

| Category                               | 2018 | 2019 | 2020 | 2021 | 2022 | 2023 |
|----------------------------------------|------|------|------|------|------|------|
| abstract                               | 1124 | 1217 | 227  | 1566 | 1020 | 390  |
| addenda and errata                     | 2    | 3    | 3    | 1    | 1    | 0    |
| book reviews                           | 9    | 5    | 7    | 6    | 3    | 0    |
| scientific comment                     | 1    | 0    | 0    | 0    | 0    | 0    |
| editorial                              | 0    | 1    | 0    | 1    | 0    | 0    |
| research papers                        | 54   | 74   | 55   | 49   | 42   | 46   |
| feature articles                       | 1    | 0    | 0    | 1    | 0    | 0    |
| international union of crystallography | 2    | 4    | 4    | 1    | 4    | 3    |
| lead articles                          | 0    | 0    | 2    | 1    | 0    | 0    |
| obituaries                             | 2    | 0    | 1    | 1    | 2    | 2    |
| short communications                   | 2    | 0    | 4    | 2    | 5    | 3    |
| scientific commentaries                | 2    | 1    | 2    | 2    | 0    | 1    |
| topical reviews                        | 1    | 0    | 1    | 0    | 0    | 0    |

### 11.2. *Acta Crystallographica Section B*

| Category                | 2018 | 2019 | 2020 | 2021 | 2022 | 2023 |
|-------------------------|------|------|------|------|------|------|
| addenda and errata      | 1    | 0    | 1    | 1    | 0    | 2    |
| book reviews            | 3    | 7    | 4    | 2    | 2    | 1    |
| scientific comment      | 0    | 1    | 0    | 0    | 0    | 0    |
| editorial               | 1    | 1    | 0    | 2    | 1    | 1    |
| research papers         | 63   | 120  | 107  | 102  | 81   | 52   |
| feature articles        | 1    | 1    | 0    | 0    | 0    | 0    |
| lead articles           | 0    | 2    | 0    | 0    | 0    | 0    |
| letters to the editor   | 0    | 0    | 0    | 0    | 2    | 0    |
| obituaries              | 0    | 2    | 0    | 0    | 1    | 0    |
| opinions                | 1    | 0    | 0    | 1    | 4    | 0    |
| short communications    | 1    | 0    | 0    | 0    | 0    | 0    |
| scientific commentaries | 1    | 2    | 5    | 4    | 2    | 7    |
| topical reviews         | 3    | 1    | 0    | 0    | 2    | 0    |

### 11.3. *Acta Crystallographica Section C*

| Category                | 2018 | 2019 | 2020 | 2021 | 2022 | 2023 |
|-------------------------|------|------|------|------|------|------|
| addenda and errata      | 0    | 0    | 2    | 1    | 0    | 1    |
| book reviews            | 3    | 2    | 2    | 0    | 0    | 0    |
| editorial               | 1    | 0    | 0    | 0    | 0    | 1    |
| research papers         | 227  | 203  | 137  | 98   | 93   | 60   |
| feature articles        | 3    | 3    | 0    | 0    | 0    | 0    |
| letters to the editor   | 0    | 0    | 0    | 2    | 0    | 0    |
| scientific commentaries | 0    | 6    | 2    | 4    | 3    | 3    |
| topical reviews         | 0    | 0    | 0    | 0    | 0    | 2    |

#### 11.4. *Acta Crystallographica Section D*

| Category                | 2018 | 2019 | 2020 | 2021 | 2022 | 2023 |
|-------------------------|------|------|------|------|------|------|
| addenda and errata      | 3    | 0    | 2    | 2    | 0    | 2    |
| book reviews            | 2    | 3    | 1    | 1    | 1    | 0    |
| scientific comment      | 1    | 0    | 0    | 0    | 0    | 1    |
| editorial               | 1    | 2    | 3    | 3    | 1    | 3    |
| research papers         | 110  | 98   | 115  | 132  | 122  | 89   |
| feature articles        | 0    | 2    | 2    | 1    | 1    | 1    |
| lead articles           | 1    | 0    | 0    | 0    | 0    | 0    |
| letters to the editor   | 0    | 1    | 2    | 0    | 0    | 2    |
| obituaries              | 1    | 4    | 1    | 1    | 1    | 3    |
| essays                  | 0    | 0    | 1    | 1    | 1    | 0    |
| scientific commentaries | 1    | 1    | 1    | 2    | 0    | 3    |
| topical reviews         | 0    | 1    | 1    | 3    | 2    | 1    |

#### 11.5. *Acta Crystallographica Section E*

| Category                                | 2018 | 2019 | 2020 | 2021 | 2022 | 2023 |
|-----------------------------------------|------|------|------|------|------|------|
| addenda and errata                      | 2    | 1    | 4    | 1    | 6    | 0    |
| editorial                               | 1    | 0    | 0    | 0    | 1    | 1    |
| research communications (inorganic)     | 19   | 25   | 30   | 15   | 15   | 20   |
| research communications (metal-organic) | 142  | 118  | 127  | 102  | 86   | 80   |
| research communications (organic)       | 247  | 249  | 205  | 145  | 151  | 136  |
| obituaries                              | 0    | 0    | 0    | 0    | 0    | 1    |
| teaching and education                  | 0    | 0    | 0    | 0    | 3    | 4    |

#### 11.6. *Acta Crystallographica Section F*

| Category                | 2018 | 2019 | 2020 | 2021 | 2022 | 2023 |
|-------------------------|------|------|------|------|------|------|
| addenda and errata      | 0    | 1    | 2    | 0    | 2    | 0    |
| book reviews            | 1    | 0    | 0    | 0    | 0    | 0    |
| scientific comment      | 0    | 0    | 0    | 0    | 1    | 0    |
| editorial               | 1    | 5    | 3    | 2    | 0    | 4    |
| methods communications  | 0    | 3    | 5    | 9    | 3    | 1    |
| research communications | 113  | 95   | 76   | 51   | 48   | 36   |
| scientific commentaries | 0    | 1    | 0    | 1    | 0    | 1    |
| topical reviews         | 2    | 1    | 0    | 1    | 1    | 0    |

#### 11.7. *Journal of Applied Crystallography*

| Category                   | 2018 | 2019 | 2020 | 2021 | 2022 | 2023 |
|----------------------------|------|------|------|------|------|------|
| addenda and errata         | 4    | 1    | 1    | 4    | 0    | 1    |
| book reviews               | 6    | 12   | 7    | 5    | 3    | 3    |
| CIF applications           | 0    | 0    | 0    | 1    | 1    | 0    |
| cryocrystallography papers | 1    | 2    | 0    | 0    | 0    | 0    |
| computer programs          | 20   | 21   | 26   | 23   | 23   | 23   |
| crystallographers          | 1    | 1    | 6    | 4    | 0    | 5    |
| editorial                  | 2    | 1    | 0    | 1    | 0    | 2    |
| research papers            | 152  | 121  | 132  | 145  | 131  | 151  |
| feature articles           | 1    | 0    | 0    | 1    | 0    | 1    |
| lead articles              | 0    | 0    | 0    | 1    | 0    | 0    |
| letters to the editor      | 0    | 2    | 0    | 1    | 2    | 2    |
| laboratory notes           | 2    | 1    | 6    | 4    | 1    | 2    |
| new commercial products    | 0    | 0    | 1    | 0    | 0    | 0    |
| short communications       | 5    | 5    | 4    | 7    | 6    | 2    |
| scientific commentaries    | 0    | 0    | 2    | 1    | 0    | 1    |
| teaching and education     | 7    | 5    | 3    | 4    | 8    | 4    |
| topical reviews            | 0    | 0    | 0    | 0    | 0    | 1    |

### 11.8. *Journal of Synchrotron Radiation*

| Category                               | 2018 | 2019 | 2020 | 2021 | 2022 | 2023 |
|----------------------------------------|------|------|------|------|------|------|
| addenda and errata                     | 1    | 3    | 1    | 4    | 6    | 2    |
| beamlines                              | 17   | 27   | 23   | 39   | 19   | 22   |
| book reviews                           | 2    | 0    | 0    | 0    | 0    | 0    |
| current events                         | 1    | 0    | 0    | 0    | 0    | 0    |
| computer programs                      | 12   | 2    | 6    | 5    | 8    | 1    |
| editorial                              | 2    | 1    | 2    | 3    | 1    | 0    |
| research papers                        | 172  | 203  | 158  | 151  | 130  | 95   |
| feature articles                       | 4    | 0    | 0    | 0    | 0    | 0    |
| international union of crystallography | 0    | 0    | 3    | 0    | 0    | 0    |
| laboratory notes                       | 2    | 0    | 1    | 1    | 0    | 1    |
| obituaries                             | 1    | 0    | 1    | 0    | 1    | 2    |
| short communications                   | 6    | 10   | 14   | 9    | 4    | 5    |
| scientific commentaries                | 0    | 0    | 0    | 2    | 0    | 1    |
| teaching and education                 | 1    | 2    | 0    | 1    | 0    | 0    |
| topical reviews                        | 1    | 1    | 0    | 0    | 0    | 0    |

### 11.9. *IUCrJ*

| Category                               | 2018 | 2019 | 2020 | 2021 | 2022 | 2023 |
|----------------------------------------|------|------|------|------|------|------|
| addenda and errata                     | 1    | 2    | 1    | 2    | 1    | 1    |
| scientific comment                     | 2    | 0    | 0    | 0    | 0    | 0    |
| editorial                              | 4    | 6    | 5    | 3    | 4    | 5    |
| research papers                        | 75   | 94   | 100  | 79   | 62   | 56   |
| feature articles                       | 1    | 1    | 1    | 3    | 0    | 1    |
| international union of crystallography | 0    | 0    | 0    | 0    | 2    | 0    |
| lead articles                          | 0    | 0    | 1    | 1    | 0    | 1    |
| letters to the editor                  | 2    | 0    | 0    | 1    | 0    | 1    |
| obituaries                             | 0    | 0    | 0    | 1    | 0    | 0    |
| research letters                       | 5    | 6    | 8    | 6    | 5    | 2    |
| scientific commentaries                | 7    | 8    | 11   | 11   | 12   | 9    |
| topical reviews                        | 1    | 3    | 2    | 1    | 3    | 4    |

### 11.10. *IUCrData*

| Category                     | 2018 | 2019 | 2020 | 2021 | 2022 | 2023 |
|------------------------------|------|------|------|------|------|------|
| addenda and errata           | 1    | 0    | 2    | 2    | 0    | 0    |
| editorial                    | 0    | 0    | 0    | 0    | 1    | 0    |
| data reports (inorganic)     | 10   | 4    | 7    | 6    | 3    | 7    |
| data reports (metal-organic) | 54   | 57   | 37   | 36   | 35   | 39   |
| data reports (organic)       | 178  | 104  | 94   | 52   | 53   | 76   |
| raw data letters             | 0    | 0    | 0    | 0    | 2    | 1    |
